# Supplementary material
Source: PubMed Central journal article supplement (PMC6859642)
Supplement: NIHMS1539530-supplement-Supplement2.pdf [file NIHMS1539530-supplement-Supplement2.pdf]

Supplementary Information for:

## Assessing PM<sub>2.5</sub> Model Performance for the Conterminous U.S. with Comparison to Model Performance Statistics from 2007-2015

James T. Kelly<sup>1,\*</sup>, Shannon N. Koplitz<sup>1</sup>, Kirk R. Baker<sup>1</sup>, Amara L. Holder<sup>2</sup>, Havala O.T. Pye<sup>2</sup>, Benjamin N. Murphy<sup>2</sup>, Jesse O. Bash<sup>2</sup>, Barron H. Henderson<sup>1</sup>, Norm Possiel<sup>1</sup>, Heather Simon<sup>1</sup>, Alison M. Eyth<sup>1</sup>, Carey Jang<sup>1</sup>, Sharon Phillips<sup>1</sup>, and Brian Timin<sup>1</sup>

<sup>1</sup>*Office of Air Quality Planning and Standards, U.S. Environmental Protection Agency, Research Triangle Park, NC 27711, USA*

<sup>2</sup>*Office of Research and Development, U.S. Environmental Protection Agency, Research Triangle Park, NC 27711, USA*

\*Correspondence to

James T Kelly

Air Quality Modeling Group | Air Quality Assessment Division

Office of Air Quality Planning & Standards | Office of Air & Radiation

US Environmental Protection Agency

109 TW Alexander Drive | Mail Drop: C439-01

Research Triangle Park, NC 27711

Tel: (919) 541-0886 | Fax: (919) 541-0044 | Email: [kelly.james@epa.gov](mailto:kelly.james@epa.gov)

Table S1. Median (range) of performance statistics for PM<sub>2.5</sub> at AQS (FRM/FEM) sites for years 2007-2015.

| Region      | Season | MB<br>( $\mu\text{g m}^{-3}$ ) | NMB<br>(%)             | RMSE<br>( $\mu\text{g m}^{-3}$ ) | NME<br>(%)          | <i>r</i>            |
|-------------|--------|--------------------------------|------------------------|----------------------------------|---------------------|---------------------|
| NE          | Winter | 3.47 (2.41 to 9.06)            | 36.2 (22.5 to 79.3)    | 8.46 (6.43 to 14.57)             | 51.2 (42.1 to 87.7) | 0.68 (0.45 to 0.74) |
|             | Spring | 1.21 (-0.48 to 2.72)           | 14.4 (-5.2 to 34.9)    | 5.19 (3.99 to 9.46)              | 44.0 (34.7 to 62.5) | 0.59 (0.46 to 0.68) |
|             | Summer | -2.12 (-4.82 to 1.25)          | -18.2 (-35.4 to 15.0)  | 6.07 (4.06 to 8.39)              | 36.9 (35.2 to 54.6) | 0.66 (0.22 to 0.71) |
|             | Fall   | 1.90 (0.38 to 3.34)            | 26.5 ( 4.9 to 43.3)    | 6.07 (4.34 to 10.20)             | 45.2 (39.1 to 69.2) | 0.70 (0.37 to 0.73) |
|             | All    | 1.26 (-0.29 to 3.09)           | 15.0 (-3.1 to 36.3)    | 6.94 (5.45 to 10.86)             | 44.2 (40.3 to 64.6) | 0.63 (0.42 to 0.67) |
| SE          | Winter | 2.06 (-0.07 to 3.54)           | 24.1 (-0.8 to 38.9)    | 6.07 (4.85 to 7.41)              | 47.4 (34.7 to 54.4) | 0.58 (0.53 to 0.61) |
|             | Spring | -1.31 (-3.41 to 0.78)          | -13.9 (-30.6 to 8.7)   | 4.67 (4.08 to 9.57)              | 34.2 (31.7 to 42.3) | 0.59 (0.48 to 0.68) |
|             | Summer | -3.70 (-6.64 to 0.25)          | -28.3 (-52.4 to 2.6)   | 6.06 (4.14 to 9.27)              | 37.1 (35.2 to 53.1) | 0.60 (0.47 to 0.68) |
|             | Fall   | 0.53 (-2.35 to 1.78)           | 6.2 (-28.0 to 20.4)    | 4.32 (4.04 to 7.02)              | 36.5 (29.9 to 42.1) | 0.65 (0.57 to 0.70) |
|             | All    | -0.44 (-2.87 to 1.15)          | -5.2 (-29.7 to 13.1)   | 5.39 (4.51 to 8.40)              | 39.3 (35.8 to 43.9) | 0.52 (0.46 to 0.61) |
| Ohio Valley | Winter | 1.81 (0.84 to 4.55)            | 17.1 ( 7.9 to 37.7)    | 5.75 (5.32 to 8.29)              | 38.4 (33.2 to 50.4) | 0.66 (0.52 to 0.70) |
|             | Spring | -0.14 (-1.21 to 1.21)          | -1.0 (-11.9 to 11.0)   | 5.04 (4.07 to 7.13)              | 35.9 (32.8 to 39.6) | 0.60 (0.47 to 0.65) |
|             | Summer | -2.23 (-3.87 to -0.24)         | -15.5 (-29.2 to -2.0)  | 5.63 (4.30 to 7.24)              | 32.1 (29.3 to 37.5) | 0.59 (0.55 to 0.63) |
|             | Fall   | 1.61 (0.12 to 3.84)            | 15.5 ( 1.2 to 37.4)    | 6.23 (4.56 to 7.90)              | 38.9 (33.2 to 50.9) | 0.67 (0.63 to 0.76) |
|             | All    | 0.53 (-0.90 to 1.29)           | 3.8 (-8.0 to 13.6)     | 6.00 (4.61 to 6.82)              | 36.2 (33.4 to 40.6) | 0.59 (0.55 to 0.64) |
| MW          | Winter | 1.18 (-0.56 to 4.79)           | 10.5 (-4.3 to 49.1)    | 6.14 (4.75 to 8.31)              | 38.3 (29.8 to 61.7) | 0.70 (0.61 to 0.75) |
|             | Spring | 0.23 (-1.15 to 1.70)           | 2.4 (-12.3 to 19.8)    | 5.12 (4.10 to 5.58)              | 40.2 (32.6 to 43.6) | 0.65 (0.48 to 0.73) |
|             | Summer | -1.35 (-3.36 to 0.22)          | -15.3 (-37.8 to 2.8)   | 4.54 (4.05 to 5.61)              | 37.5 (33.5 to 43.6) | 0.60 (0.56 to 0.73) |
|             | Fall   | 1.40 (-0.36 to 3.98)           | 20.2 (-3.7 to 48.5)    | 4.92 (4.12 to 7.16)              | 42.1 (34.3 to 58.3) | 0.75 (0.64 to 0.82) |
|             | All    | 0.51 (-1.10 to 2.17)           | 6.2 (-11.4 to 25.1)    | 5.16 (4.82 to 6.36)              | 40.2 (35.4 to 48.9) | 0.64 (0.63 to 0.74) |
| South       | Winter | 1.84 (-0.14 to 4.10)           | 23.0 (-1.7 to 45.8)    | 7.32 (5.10 to 13.03)             | 54.3 (40.6 to 69.0) | 0.43 (0.30 to 0.49) |
|             | Spring | -1.61 (-4.75 to -0.74)         | -16.3 (-44.4 to -7.6)  | 6.02 (4.24 to 7.46)              | 42.9 (35.8 to 52.6) | 0.37 (0.19 to 0.51) |
|             | Summer | -2.89 (-5.93 to -0.76)         | -24.4 (-52.6 to -6.7)  | 6.39 (5.59 to 7.78)              | 44.0 (38.0 to 54.9) | 0.42 (0.30 to 0.58) |
|             | Fall   | 1.21 (-1.70 to 3.09)           | 15.9 (-19.6 to 28.2)   | 5.68 (3.76 to 10.29)             | 44.2 (35.5 to 52.4) | 0.55 (0.50 to 0.63) |
|             | All    | -0.13 (-2.96 to 0.71)          | -1.6 (-31.0 to 6.5)    | 6.55 (5.35 to 9.83)              | 46.7 (40.7 to 51.8) | 0.37 (0.31 to 0.52) |
| SW          | Winter | -0.37 (-2.65 to 3.13)          | -4.6 (-29.8 to 50.6)   | 9.07 (6.50 to 12.84)             | 66.0 (53.1 to 86.0) | 0.44 (0.27 to 0.61) |
|             | Spring | -0.61 (-3.65 to 1.04)          | -9.4 (-49.8 to 20.6)   | 5.36 (3.60 to 6.52)              | 55.7 (48.1 to 63.1) | 0.25 (0.12 to 0.44) |
|             | Summer | -2.23 (-3.29 to -1.12)         | -28.6 (-46.0 to -18.5) | 5.16 (3.80 to 6.12)              | 52.5 (43.1 to 53.7) | 0.30 (0.22 to 0.59) |
|             | Fall   | 0.58 (-1.74 to 2.32)           | 10.5 (-24.4 to 38.5)   | 4.86 (4.06 to 6.60)              | 57.6 (43.1 to 76.0) | 0.47 (0.34 to 0.56) |
|             | All    | -0.23 (-2.48 to 0.82)          | -3.7 (-35.6 to 12.1)   | 6.54 (4.77 to 8.01)              | 57.7 (48.9 to 68.6) | 0.40 (0.29 to 0.52) |
| NRP         | Winter | -2.18 (-5.29 to -0.77)         | -35.5 (-51.8 to -12.3) | 7.40 (6.25 to 10.79)             | 63.4 (59.1 to 64.8) | 0.28 (0.23 to 0.37) |
|             | Spring | -1.52 (-2.55 to 0.44)          | -25.8 (-42.7 to 9.6)   | 4.26 (3.80 to 29.58)             | 50.8 (47.4 to 63.9) | 0.53 (0.20 to 0.60) |
|             | Summer | -2.05 (-3.48 to -0.91)         | -26.5 (-57.2 to -8.8)  | 5.21 (4.42 to 17.61)             | 54.0 (48.5 to 73.8) | 0.50 (0.24 to 0.80) |
|             | Fall   | -0.51 (-2.29 to -0.15)         | -7.7 (-36.1 to -2.6)   | 5.97 (4.60 to 8.74)              | 55.4 (51.5 to 60.9) | 0.40 (0.26 to 0.74) |
|             | All    | -1.50 (-2.92 to -0.99)         | -23.3 (-45.1 to -15.1) | 6.80 (5.05 to 18.06)             | 55.8 (53.5 to 66.0) | 0.39 (0.24 to 0.70) |
| NW          | Winter | -0.66 (-3.20 to 0.82)          | -6.1 (-35.9 to 8.2)    | 10.20 (8.18 to 13.06)            | 77.6 (68.0 to 81.2) | 0.29 (0.14 to 0.45) |
|             | Spring | 0.54 (-1.93 to 1.84)           | 11.8 (-35.2 to 40.5)   | 6.24 (4.10 to 6.72)              | 71.5 (57.8 to 85.5) | 0.34 (0.25 to 0.48) |
|             | Summer | -0.04 (-2.58 to 1.95)          | -0.8 (-39.9 to 21.2)   | 7.24 (4.03 to 32.40)             | 62.6 (46.6 to 67.7) | 0.39 (0.28 to 0.53) |
|             | Fall   | 0.97 (-1.22 to 3.09)           | 9.8 (-18.4 to 34.9)    | 9.36 (5.78 to 15.33)             | 65.2 (52.3 to 82.3) | 0.43 (0.31 to 0.56) |
|             | All    | 0.06 (-1.80 to 1.55)           | 1.0 (-25.5 to 21.2)    | 9.09 (5.75 to 19.26)             | 69.8 (57.3 to 75.4) | 0.40 (0.31 to 0.47) |
| West        | Winter | -2.08 (-2.99 to 0.30)          | -17.8 (-25.1 to 2.6)   | 9.66 (8.09 to 10.75)             | 49.5 (43.3 to 53.3) | 0.61 (0.53 to 0.68) |
|             | Spring | -1.05 (-3.03 to 1.68)          | -12.7 (-34.0 to 22.1)  | 5.86 (4.17 to 6.75)              | 46.4 (38.3 to 56.0) | 0.48 (0.44 to 0.61) |
|             | Summer | -1.73 (-3.40 to 3.41)          | -17.2 (-34.8 to 22.0)  | 6.58 (5.76 to 15.92)             | 46.8 (43.5 to 58.4) | 0.48 (0.37 to 0.72) |
|             | Fall   | -1.33 (-2.43 to 0.56)          | -13.4 (-21.1 to 5.8)   | 7.70 (6.36 to 16.85)             | 47.1 (44.0 to 53.9) | 0.53 (0.37 to 0.56) |
|             | All    | -1.43 (-2.55 to 0.70)          | -12.2 (-25.0 to 5.7)   | 7.95 (6.57 to 11.12)             | 47.6 (43.1 to 53.4) | 0.53 (0.44 to 0.65) |
| All         | Winter | 1.00 (-0.49 to 3.12)           | 11.3 (-4.8 to 30.4)    | 8.13 (7.12 to 10.33)             | 51.9 (46.6 to 65.6) | 0.51 (0.45 to 0.56) |
|             | Spring | -0.17 (-2.12 to 0.49)          | -2.1 (-22.9 to 6.8)    | 5.61 (4.95 to 8.86)              | 43.8 (42.3 to 45.5) | 0.52 (0.35 to 0.60) |
|             | Summer | -2.22 (-3.84 to -0.22)         | -20.9 (-39.3 to -2.5)  | 6.19 (5.69 to 13.01)             | 42.3 (39.7 to 48.5) | 0.55 (0.47 to 0.63) |
|             | Fall   | 1.13 (-0.94 to 1.86)           | 14.5 (-11.2 to 20.8)   | 6.94 (5.37 to 9.22)              | 47.9 (41.3 to 52.9) | 0.55 (0.44 to 0.60) |
|             | All    | 0.12 (-1.74 to 0.61)           | 1.1 (-18.9 to 7.3)     | 7.09 (5.93 to 9.94)              | 46.4 (43.4 to 50.3) | 0.51 (0.45 to 0.57) |

Table S2. Median (range) of performance statistics for PM<sub>2.5</sub> sulfate at CSN sites for years 2007-2015.

| Region      | Season | MB<br>( $\mu\text{g m}^{-3}$ ) | NMB<br>(%)             | RMSE<br>( $\mu\text{g m}^{-3}$ ) | NME<br>(%)           | <i>r</i>            |
|-------------|--------|--------------------------------|------------------------|----------------------------------|----------------------|---------------------|
| NE          | Winter | -0.37 (-0.96 to 0.00)          | -16.6 (-33.2 to 0.3)   | 1.28 (1.01 to 1.95)              | 41.0 (30.5 to 52.7)  | 0.48 (0.18 to 0.68) |
|             | Spring | -0.07 (-0.94 to 0.01)          | -4.0 (-32.0 to 0.7)    | 0.78 (0.57 to 1.44)              | 29.6 (26.3 to 37.0)  | 0.73 (0.57 to 0.86) |
|             | Summer | -0.45 (-1.44 to 0.04)          | -14.6 (-29.0 to 2.8)   | 1.48 (0.56 to 2.80)              | 29.9 (24.8 to 38.3)  | 0.82 (0.77 to 0.88) |
|             | Fall   | -0.14 (-0.57 to 0.12)          | -7.8 (-22.3 to 10.8)   | 0.81 (0.63 to 1.72)              | 33.5 (28.5 to 37.3)  | 0.80 (0.63 to 0.87) |
|             | All    | -0.29 (-0.94 to 0.02)          | -14.7 (-29.3 to 1.7)   | 1.06 (0.79 to 1.88)              | 31.9 (31.0 to 39.6)  | 0.72 (0.61 to 0.86) |
| SE          | Winter | -0.13 (-0.65 to 0.08)          | -5.4 (-28.8 to 6.1)    | 1.03 (0.74 to 1.29)              | 40.2 (32.6 to 44.6)  | 0.54 (0.41 to 0.65) |
|             | Spring | -0.46 (-1.31 to 0.01)          | -18.1 (-38.5 to 0.8)   | 0.95 (0.68 to 1.76)              | 29.4 (26.2 to 41.0)  | 0.65 (0.54 to 0.74) |
|             | Summer | -0.71 (-1.84 to 0.12)          | -21.2 (-40.0 to 6.6)   | 1.34 (0.52 to 2.81)              | 31.6 (26.8 to 42.0)  | 0.68 (0.61 to 0.76) |
|             | Fall   | -0.04 (-0.84 to 0.22)          | -2.2 (-30.0 to 24.9)   | 0.82 (0.56 to 1.58)              | 31.9 (27.9 to 43.7)  | 0.72 (0.57 to 0.77) |
|             | All    | -0.36 (-1.16 to 0.07)          | -15.1 (-35.4 to 5.7)   | 1.03 (0.64 to 1.91)              | 32.7 (30.4 to 40.5)  | 0.64 (0.60 to 0.76) |
| Ohio Valley | Winter | -0.65 (-1.23 to -0.49)         | -32.0 (-42.2 to -19.3) | 1.41 (1.24 to 2.24)              | 42.8 (36.5 to 47.2)  | 0.54 (0.28 to 0.64) |
|             | Spring | -0.35 (-1.36 to -0.03)         | -16.1 (-38.2 to -1.8)  | 1.13 (0.83 to 1.96)              | 31.3 (25.3 to 40.4)  | 0.69 (0.60 to 0.84) |
|             | Summer | -0.65 (-1.48 to -0.02)         | -17.7 (-32.6 to -0.6)  | 1.52 (1.00 to 2.95)              | 31.4 (27.3 to 38.8)  | 0.73 (0.68 to 0.78) |
|             | Fall   | -0.24 (-0.92 to 0.11)          | -11.7 (-27.0 to 8.2)   | 0.91 (0.59 to 1.89)              | 30.6 (28.3 to 34.6)  | 0.79 (0.71 to 0.87) |
|             | All    | -0.43 (-1.25 to -0.11)         | -18.0 (-34.6 to -6.2)  | 1.33 (0.99 to 2.15)              | 32.8 (31.0 to 39.9)  | 0.70 (0.62 to 0.82) |
| MW          | Winter | -0.38 (-0.95 to -0.16)         | -21.8 (-40.5 to -8.9)  | 1.02 (0.76 to 1.46)              | 40.0 (34.9 to 46.2)  | 0.59 (0.47 to 0.71) |
|             | Spring | -0.06 (-0.85 to 0.05)          | -3.5 (-35.0 to 3.5)    | 0.82 (0.55 to 1.31)              | 29.3 (25.6 to 39.8)  | 0.80 (0.67 to 0.91) |
|             | Summer | -0.41 (-0.87 to 0.08)          | -16.9 (-33.7 to 4.8)   | 1.18 (0.70 to 1.80)              | 33.5 (26.9 to 42.3)  | 0.80 (0.74 to 0.86) |
|             | Fall   | -0.13 (-0.64 to 0.18)          | -8.6 (-29.2 to 14.3)   | 0.71 (0.62 to 1.48)              | 34.5 (28.0 to 39.9)  | 0.81 (0.71 to 0.90) |
|             | All    | -0.18 (-0.82 to -0.00)         | -10.5 (-34.2 to -0.4)  | 0.93 (0.66 to 1.47)              | 33.9 (30.2 to 40.4)  | 0.79 (0.71 to 0.84) |
| South       | Winter | -0.15 (-0.65 to 0.10)          | -11.8 (-34.8 to 8.3)   | 1.09 (0.69 to 2.17)              | 40.8 (35.7 to 51.2)  | 0.64 (0.40 to 0.70) |
|             | Spring | -0.47 (-1.35 to -0.04)         | -21.9 (-47.6 to -2.2)  | 1.00 (0.72 to 1.82)              | 32.4 (28.1 to 48.7)  | 0.63 (0.50 to 0.82) |
|             | Summer | -0.65 (-1.49 to -0.18)         | -25.8 (-49.9 to -9.7)  | 1.13 (0.75 to 2.05)              | 37.6 (29.5 to 52.0)  | 0.61 (0.53 to 0.70) |
|             | Fall   | -0.17 (-1.06 to 0.10)          | -10.8 (-37.8 to 7.7)   | 0.80 (0.65 to 1.63)              | 33.0 (29.6 to 43.1)  | 0.71 (0.58 to 0.83) |
|             | All    | -0.36 (-1.14 to -0.02)         | -15.6 (-43.4 to -0.9)  | 1.10 (0.73 to 1.87)              | 34.6 (31.7 to 47.1)  | 0.66 (0.54 to 0.70) |
| SW          | Winter | -0.04 (-0.28 to 0.16)          | -5.9 (-33.7 to 28.9)   | 0.59 (0.34 to 1.19)              | 53.5 (47.7 to 69.4)  | 0.33 (0.12 to 0.65) |
|             | Spring | -0.12 (-0.35 to 0.35)          | -14.6 (-36.7 to 57.1)  | 0.43 (0.24 to 0.61)              | 34.5 (28.4 to 65.3)  | 0.55 (0.38 to 0.65) |
|             | Summer | -0.39 (-0.46 to -0.11)         | -34.8 (-45.2 to -13.3) | 0.58 (0.39 to 0.68)              | 43.5 (38.2 to 50.0)  | 0.43 (0.09 to 0.53) |
|             | Fall   | -0.08 (-0.37 to 0.10)          | -12.9 (-37.8 to 17.2)  | 0.42 (0.29 to 0.54)              | 40.3 (31.8 to 52.7)  | 0.53 (0.24 to 0.78) |
|             | All    | -0.11 (-0.32 to 0.11)          | -14.9 (-36.1 to 17.9)  | 0.49 (0.43 to 0.66)              | 43.3 (39.7 to 52.0)  | 0.38 (0.29 to 0.55) |
| NRP         | Winter | -0.20 (-0.57 to -0.05)         | -21.6 (-45.5 to -6.0)  | 0.67 (0.48 to 0.90)              | 43.9 (35.6 to 59.7)  | 0.72 (0.43 to 0.77) |
|             | Spring | -0.17 (-0.54 to 0.09)          | -12.4 (-40.3 to 11.2)  | 0.66 (0.35 to 0.80)              | 35.1 (26.1 to 42.6)  | 0.76 (0.61 to 0.84) |
|             | Summer | -0.19 (-0.52 to 0.18)          | -17.6 (-38.3 to 21.3)  | 0.64 (0.41 to 1.16)              | 40.4 (25.8 to 58.7)  | 0.78 (0.50 to 0.90) |
|             | Fall   | -0.03 (-0.41 to 0.13)          | -3.5 (-32.3 to 17.8)   | 0.52 (0.35 to 1.15)              | 38.0 (30.3 to 49.4)  | 0.78 (0.63 to 0.91) |
|             | All    | -0.17 (-0.51 to 0.02)          | -15.9 (-39.2 to 3.3)   | 0.73 (0.40 to 0.88)              | 39.0 (31.3 to 51.0)  | 0.76 (0.56 to 0.81) |
| NW          | Winter | 0.26 (-0.15 to 0.44)           | 47.8 (-14.1 to 103.4)  | 0.69 (0.55 to 2.13)              | 70.8 (57.9 to 127.8) | 0.31 (0.13 to 0.68) |
|             | Spring | 0.20 (-0.13 to 0.53)           | 36.3 (-14.7 to 99.2)   | 0.50 (0.35 to 0.70)              | 51.4 (37.7 to 103.8) | 0.55 (0.44 to 0.70) |
|             | Summer | 0.06 (-0.23 to 0.42)           | 5.9 (-20.4 to 62.3)    | 0.58 (0.39 to 0.91)              | 38.4 (30.5 to 81.4)  | 0.60 (0.14 to 0.73) |
|             | Fall   | 0.18 (0.06 to 0.49)            | 20.1 (-8.6 to 108.3)   | 0.67 (0.37 to 0.90)              | 57.0 (37.7 to 113.3) | 0.42 (0.29 to 0.60) |
|             | All    | 0.15 (-0.03 to 0.45)           | 17.8 (-4.0 to 87.6)    | 0.66 (0.43 to 1.07)              | 52.6 (43.5 to 103.2) | 0.46 (0.19 to 0.52) |
| West        | Winter | 0.11 (-0.27 to 0.24)           | 16.2 (-29.2 to 39.5)   | 0.64 (0.41 to 0.98)              | 63.6 (46.5 to 66.7)  | 0.46 (0.29 to 0.65) |
|             | Spring | -0.18 (-0.62 to 0.24)          | -17.5 (-39.1 to 24.2)  | 0.61 (0.50 to 1.18)              | 38.7 (35.1 to 47.5)  | 0.68 (0.54 to 0.73) |
|             | Summer | -0.62 (-0.76 to -0.03)         | -33.0 (-44.5 to -2.1)  | 1.05 (0.61 to 2.02)              | 43.1 (32.6 to 48.3)  | 0.56 (0.49 to 0.65) |
|             | Fall   | -0.20 (-0.72 to 0.20)          | -20.1 (-43.9 to 27.3)  | 0.55 (0.46 to 1.20)              | 42.2 (35.4 to 48.5)  | 0.61 (0.57 to 0.74) |
|             | All    | -0.23 (-0.57 to 0.14)          | -19.7 (-36.8 to 14.5)  | 0.80 (0.56 to 1.41)              | 44.3 (39.0 to 47.3)  | 0.60 (0.49 to 0.68) |
| All         | Winter | -0.27 (-0.76 to -0.10)         | -15.7 (-34.9 to -7.5)  | 1.13 (1.00 to 1.55)              | 43.1 (37.7 to 47.3)  | 0.58 (0.42 to 0.63) |
|             | Spring | -0.22 (-1.00 to 0.04)          | -11.2 (-37.2 to 3.1)   | 0.90 (0.67 to 1.54)              | 31.9 (27.5 to 40.7)  | 0.73 (0.68 to 0.84) |
|             | Summer | -0.54 (-1.22 to -0.01)         | -19.2 (-34.7 to -0.7)  | 1.36 (0.80 to 2.43)              | 32.9 (28.9 to 41.1)  | 0.79 (0.73 to 0.84) |
|             | Fall   | -0.16 (-0.70 to 0.15)          | -11.3 (-28.7 to 15.3)  | 0.76 (0.58 to 1.53)              | 34.1 (31.0 to 37.8)  | 0.79 (0.71 to 0.84) |
|             | All    | -0.27 (-0.92 to 0.02)          | -13.2 (-34.0 to 1.8)   | 1.06 (0.79 to 1.73)              | 33.9 (32.9 to 41.2)  | 0.74 (0.67 to 0.83) |

Table S3. Median (range) of performance statistics for PM<sub>2.5</sub> sulfate at IMPROVE sites for years 2007-2015.

| Region      | Season | MB<br>( $\mu\text{g m}^{-3}$ ) | NMB<br>(%)             | RMSE<br>( $\mu\text{g m}^{-3}$ ) | NME<br>(%)           | <i>r</i>            |
|-------------|--------|--------------------------------|------------------------|----------------------------------|----------------------|---------------------|
| NE          | Winter | -0.17 (-0.44 to 0.08)          | -16.2 (-25.5 to 7.2)   | 0.71 (0.44 to 1.16)              | 35.5 (24.8 to 45.6)  | 0.69 (0.42 to 0.83) |
|             | Spring | 0.01 (-0.39 to 0.29)           | 0.8 (-21.3 to 29.2)    | 0.72 (0.37 to 0.98)              | 29.7 (27.1 to 47.1)  | 0.78 (0.61 to 0.87) |
|             | Summer | -0.21 (-1.06 to 0.09)          | -11.9 (-29.6 to 8.2)   | 1.16 (0.42 to 2.19)              | 34.9 (29.9 to 42.8)  | 0.84 (0.70 to 0.89) |
|             | Fall   | -0.01 (-0.25 to 0.14)          | -1.1 (-17.0 to 15.5)   | 0.55 (0.32 to 1.17)              | 33.5 (31.1 to 41.2)  | 0.84 (0.75 to 0.90) |
|             | All    | -0.07 (-0.47 to 0.14)          | -6.3 (-23.4 to 13.3)   | 0.77 (0.42 to 1.42)              | 33.5 (31.0 to 40.2)  | 0.78 (0.68 to 0.86) |
| SE          | Winter | -0.14 (-0.47 to 0.02)          | -10.7 (-26.1 to 1.3)   | 0.78 (0.63 to 1.07)              | 36.0 (32.0 to 39.4)  | 0.60 (0.53 to 0.66) |
|             | Spring | -0.36 (-0.94 to -0.14)         | -17.0 (-32.8 to -9.2)  | 0.93 (0.60 to 1.69)              | 30.1 (24.2 to 37.4)  | 0.66 (0.59 to 0.77) |
|             | Summer | -0.83 (-1.58 to -0.19)         | -25.9 (-39.1 to -10.2) | 1.34 (0.55 to 2.80)              | 32.9 (26.3 to 42.4)  | 0.73 (0.64 to 0.79) |
|             | Fall   | -0.25 (-0.74 to 0.10)          | -11.2 (-30.2 to 11.2)  | 0.82 (0.45 to 1.53)              | 34.3 (28.9 to 38.8)  | 0.73 (0.56 to 0.80) |
|             | All    | -0.40 (-0.91 to -0.11)         | -18.2 (-33.0 to -8.1)  | 0.99 (0.57 to 1.88)              | 32.3 (30.0 to 39.5)  | 0.70 (0.63 to 0.77) |
| Ohio Valley | Winter | -0.52 (-0.80 to -0.33)         | -25.8 (-40.0 to -22.9) | 0.98 (0.66 to 1.32)              | 37.3 (33.8 to 43.3)  | 0.67 (0.59 to 0.74) |
|             | Spring | -0.41 (-1.15 to -0.14)         | -16.7 (-34.2 to -9.3)  | 1.09 (0.66 to 1.77)              | 31.0 (25.6 to 36.1)  | 0.76 (0.59 to 0.84) |
|             | Summer | -0.98 (-1.75 to -0.17)         | -27.8 (-35.6 to -8.7)  | 1.56 (0.78 to 3.07)              | 34.0 (28.5 to 38.6)  | 0.77 (0.73 to 0.83) |
|             | Fall   | -0.28 (-0.89 to 0.08)          | -16.2 (-29.3 to 7.2)   | 0.87 (0.45 to 1.99)              | 32.0 (29.4 to 37.8)  | 0.76 (0.65 to 0.88) |
|             | All    | -0.51 (-1.09 to -0.14)         | -21.3 (-33.8 to -9.4)  | 1.16 (0.66 to 2.10)              | 32.0 (30.5 to 38.4)  | 0.76 (0.74 to 0.87) |
| MW          | Winter | -0.28 (-0.54 to -0.09)         | -26.4 (-37.3 to -6.6)  | 0.72 (0.50 to 0.87)              | 38.3 (35.4 to 46.5)  | 0.71 (0.44 to 0.75) |
|             | Spring | -0.10 (-0.57 to 0.07)          | -9.0 (-33.3 to 8.0)    | 0.56 (0.37 to 0.99)              | 32.2 (27.7 to 38.1)  | 0.81 (0.66 to 0.87) |
|             | Summer | -0.21 (-0.71 to 0.11)          | -18.0 (-37.9 to 11.7)  | 0.59 (0.41 to 1.49)              | 34.8 (29.3 to 44.5)  | 0.86 (0.80 to 0.92) |
|             | Fall   | -0.07 (-0.59 to 0.15)          | -7.5 (-34.6 to 17.3)   | 0.54 (0.32 to 1.31)              | 38.0 (33.6 to 44.7)  | 0.83 (0.75 to 0.91) |
|             | All    | -0.13 (-0.51 to 0.01)          | -10.9 (-34.1 to 1.6)   | 0.61 (0.40 to 1.11)              | 36.1 (30.3 to 39.5)  | 0.80 (0.74 to 0.88) |
| South       | Winter | -0.17 (-0.41 to -0.01)         | -14.3 (-36.2 to -1.2)  | 0.72 (0.46 to 0.91)              | 38.5 (37.4 to 48.5)  | 0.69 (0.55 to 0.80) |
|             | Spring | -0.40 (-0.86 to -0.10)         | -23.0 (-46.2 to -8.9)  | 0.88 (0.60 to 1.34)              | 36.2 (28.4 to 47.3)  | 0.72 (0.60 to 0.79) |
|             | Summer | -0.70 (-1.19 to -0.54)         | -37.5 (-45.4 to -29.6) | 1.06 (0.81 to 1.98)              | 41.0 (33.6 to 48.5)  | 0.73 (0.58 to 0.81) |
|             | Fall   | -0.25 (-0.62 to -0.05)         | -19.0 (-34.1 to -4.3)  | 0.69 (0.49 to 1.69)              | 34.5 (27.8 to 42.2)  | 0.77 (0.64 to 0.88) |
|             | All    | -0.37 (-0.73 to -0.22)         | -24.3 (-40.5 to -17.3) | 0.86 (0.66 to 1.40)              | 37.9 (33.6 to 43.9)  | 0.74 (0.65 to 0.81) |
| SW          | Winter | 0.11 (0.02 to 0.18)            | 33.7 (3.9 to 51.8)     | 0.24 (0.21 to 0.37)              | 53.6 (37.3 to 69.2)  | 0.56 (0.51 to 0.76) |
|             | Spring | -0.12 (-0.35 to 0.37)          | -18.5 (-41.3 to 73.9)  | 0.42 (0.24 to 0.52)              | 34.1 (29.2 to 83.4)  | 0.56 (0.40 to 0.64) |
|             | Summer | -0.39 (-0.46 to -0.19)         | -38.2 (-49.9 to -24.3) | 0.54 (0.41 to 0.60)              | 48.6 (38.9 to 53.4)  | 0.62 (0.32 to 0.76) |
|             | Fall   | -0.14 (-0.30 to 0.05)          | -21.9 (-37.8 to 10.6)  | 0.33 (0.27 to 0.46)              | 40.7 (32.1 to 49.4)  | 0.68 (0.56 to 0.90) |
|             | All    | -0.13 (-0.25 to 0.09)          | -22.3 (-35.6 to 17.6)  | 0.43 (0.36 to 0.45)              | 42.9 (39.8 to 56.0)  | 0.53 (0.46 to 0.74) |
| NRP         | Winter | -0.03 (-0.12 to 0.08)          | -7.9 (-25.5 to 23.4)   | 0.38 (0.28 to 0.64)              | 52.6 (49.3 to 58.3)  | 0.68 (0.47 to 0.79) |
|             | Spring | -0.06 (-0.38 to 0.23)          | -10.9 (-42.8 to 43.8)  | 0.40 (0.32 to 0.64)              | 38.3 (29.2 to 61.4)  | 0.73 (0.60 to 0.82) |
|             | Summer | -0.06 (-0.25 to 0.22)          | -11.9 (-35.5 to 43.8)  | 0.35 (0.25 to 0.68)              | 41.3 (30.0 to 65.6)  | 0.68 (0.38 to 0.78) |
|             | Fall   | -0.02 (-0.18 to 0.20)          | -3.1 (-31.9 to 62.4)   | 0.33 (0.23 to 0.46)              | 41.4 (35.8 to 79.9)  | 0.70 (0.47 to 0.81) |
|             | All    | -0.02 (-0.24 to 0.16)          | -3.3 (-35.4 to 37.2)   | 0.40 (0.30 to 0.57)              | 44.4 (33.5 to 64.4)  | 0.72 (0.51 to 0.78) |
| NW          | Winter | 0.15 (0.09 to 0.21)            | 64.9 (34.4 to 142.5)   | 0.33 (0.24 to 0.64)              | 98.7 (67.7 to 162.4) | 0.45 (0.28 to 0.56) |
|             | Spring | 0.12 (-0.08 to 0.42)           | 26.9 (-13.5 to 104.5)  | 0.34 (0.28 to 0.57)              | 48.3 (37.8 to 106.9) | 0.68 (0.57 to 0.78) |
|             | Summer | 0.04 (-0.14 to 0.35)           | 7.1 (-17.9 to 79.1)    | 0.36 (0.25 to 0.61)              | 39.9 (31.3 to 87.2)  | 0.64 (0.24 to 0.77) |
|             | Fall   | 0.11 (-0.00 to 0.38)           | 28.4 (-0.4 to 152.4)   | 0.40 (0.29 to 0.84)              | 60.9 (46.6 to 161.7) | 0.51 (0.29 to 0.65) |
|             | All    | 0.10 (-0.02 to 0.34)           | 25.0 (-4.4 to 108.5)   | 0.40 (0.31 to 0.61)              | 54.8 (45.4 to 116.1) | 0.56 (0.45 to 0.67) |
| West        | Winter | 0.16 (0.03 to 0.23)            | 56.6 (10.2 to 93.3)    | 0.34 (0.22 to 0.48)              | 87.4 (60.5 to 107.1) | 0.51 (0.30 to 0.65) |
|             | Spring | -0.08 (-0.35 to 0.32)          | -12.1 (-38.5 to 50.4)  | 0.44 (0.35 to 0.77)              | 42.5 (38.4 to 68.4)  | 0.55 (0.45 to 0.65) |
|             | Summer | -0.29 (-0.39 to 0.10)          | -27.8 (-43.5 to 12.7)  | 0.63 (0.48 to 1.17)              | 48.2 (42.8 to 52.7)  | 0.38 (0.22 to 0.56) |
|             | Fall   | -0.10 (-0.27 to 0.19)          | -15.9 (-35.9 to 43.0)  | 0.42 (0.30 to 0.51)              | 46.1 (40.5 to 72.2)  | 0.52 (0.36 to 0.61) |
|             | All    | -0.09 (-0.23 to 0.20)          | -14.4 (-29.8 to 37.1)  | 0.48 (0.42 to 0.73)              | 50.4 (44.6 to 66.0)  | 0.48 (0.43 to 0.63) |
| All         | Winter | -0.03 (-0.19 to 0.07)          | -4.2 (-21.6 to 11.8)   | 0.55 (0.44 to 0.72)              | 45.0 (40.6 to 48.7)  | 0.75 (0.71 to 0.80) |
|             | Spring | -0.09 (-0.46 to 0.18)          | -10.6 (-33.9 to 23.6)  | 0.60 (0.41 to 0.95)              | 36.1 (30.5 to 50.1)  | 0.80 (0.66 to 0.88) |
|             | Summer | -0.35 (-0.63 to -0.01)         | -25.6 (-36.1 to -1.2)  | 0.86 (0.55 to 1.61)              | 40.4 (36.2 to 43.1)  | 0.83 (0.70 to 0.88) |
|             | Fall   | -0.11 (-0.34 to 0.13)          | -13.7 (-28.2 to 22.6)  | 0.52 (0.45 to 0.95)              | 38.3 (35.7 to 50.5)  | 0.81 (0.70 to 0.87) |
|             | All    | -0.13 (-0.40 to 0.08)          | -12.6 (-31.0 to 10.8)  | 0.65 (0.50 to 1.11)              | 38.6 (35.8 to 46.7)  | 0.81 (0.70 to 0.87) |

Table S4. Median (range) of performance statistics for PM<sub>2.5</sub> nitrate at CSN sites for years 2007-2015.

| Region      | Season | MB<br>( $\mu\text{g m}^{-3}$ ) | NMB<br>(%)             | RMSE<br>( $\mu\text{g m}^{-3}$ ) | NME<br>(%)            | r                    |
|-------------|--------|--------------------------------|------------------------|----------------------------------|-----------------------|----------------------|
| NE          | Winter | 0.37 (-0.12 to 1.38)           | 16.4 (-4.8 to 65.8)    | 1.66 (1.42 to 2.33)              | 45.9 (41.6 to 77.5)   | 0.68 (0.66 to 0.75)  |
|             | Spring | 0.01 (-0.28 to 0.63)           | 1.3 (-20.1 to 49.3)    | 1.12 (0.63 to 1.57)              | 55.5 (44.0 to 78.4)   | 0.70 (0.58 to 0.77)  |
|             | Summer | -0.17 (-0.28 to 0.11)          | -29.0 (-58.2 to 13.8)  | 0.53 (0.40 to 1.25)              | 69.5 (55.5 to 85.2)   | 0.54 (0.39 to 0.61)  |
|             | Fall   | 0.39 (0.08 to 0.57)            | 40.2 ( 8.9 to 55.6)    | 1.21 (0.82 to 1.83)              | 74.3 (58.3 to 85.5)   | 0.69 (0.63 to 0.79)  |
|             | All    | 0.14 (-0.06 to 0.42)           | 11.2 (-5.0 to 36.6)    | 1.24 (0.89 to 1.59)              | 55.6 (49.7 to 70.1)   | 0.74 (0.69 to 0.78)  |
| SE          | Winter | 0.71 (0.39 to 1.14)            | 76.7 (31.9 to 116.9)   | 1.45 (1.22 to 1.74)              | 93.7 (75.0 to 129.2)  | 0.62 (0.55 to 0.68)  |
|             | Spring | -0.02 (-0.20 to 0.38)          | -3.9 (-30.2 to 46.8)   | 0.59 (0.39 to 1.28)              | 68.7 (55.6 to 105.1)  | 0.55 (0.37 to 0.72)  |
|             | Summer | -0.11 (-0.25 to 0.27)          | -32.3 (-67.9 to 97.2)  | 0.31 (0.24 to 1.39)              | 72.6 (59.7 to 143.7)  | 0.22 (0.06 to 0.44)  |
|             | Fall   | 0.38 (0.21 to 0.64)            | 86.8 (44.3 to 119.4)   | 0.96 (0.77 to 1.60)              | 130.8 (99.9 to 144.4) | 0.60 (0.52 to 0.78)  |
|             | All    | 0.24 (0.08 to 0.35)            | 46.3 (12.4 to 65.3)    | 1.01 (0.80 to 1.31)              | 92.0 (83.5 to 105.8)  | 0.67 (0.55 to 0.72)  |
| Ohio Valley | Winter | 0.05 (-0.93 to 0.77)           | 1.8 (-21.3 to 34.2)    | 1.77 (1.57 to 2.67)              | 41.6 (38.6 to 51.1)   | 0.68 (0.57 to 0.79)  |
|             | Spring | 0.05 (-0.72 to 0.79)           | 3.7 (-41.7 to 48.1)    | 1.26 (0.75 to 2.07)              | 55.5 (46.9 to 83.7)   | 0.74 (0.64 to 0.78)  |
|             | Summer | -0.11 (-0.23 to 0.22)          | -17.4 (-49.2 to 31.5)  | 0.70 (0.50 to 1.49)              | 76.8 (65.6 to 107.1)  | 0.43 (0.18 to 0.54)  |
|             | Fall   | 0.55 (0.05 to 0.82)            | 46.0 ( 4.8 to 61.0)    | 1.41 (0.67 to 1.93)              | 69.4 (60.9 to 94.5)   | 0.73 (0.59 to 0.88)  |
|             | All    | 0.15 (-0.25 to 0.42)           | 9.4 (-15.6 to 26.5)    | 1.25 (1.06 to 2.00)              | 52.1 (48.5 to 67.2)   | 0.77 (0.63 to 0.84)  |
| MW          | Winter | -0.25 (-1.14 to 0.85)          | -5.5 (-26.5 to 27.0)   | 1.76 (1.23 to 3.46)              | 36.3 (29.6 to 40.8)   | 0.78 (0.57 to 0.86)  |
|             | Spring | -0.01 (-0.82 to 0.34)          | -0.3 (-38.8 to 14.8)   | 1.50 (1.00 to 2.15)              | 48.0 (39.8 to 62.2)   | 0.71 (0.62 to 0.81)  |
|             | Summer | -0.07 (-0.22 to 0.34)          | -12.2 (-44.4 to 42.8)  | 0.70 (0.45 to 1.10)              | 71.8 (58.4 to 89.6)   | 0.48 (0.35 to 0.61)  |
|             | Fall   | 0.54 (0.03 to 0.89)            | 36.1 ( 2.0 to 49.8)    | 1.42 (0.81 to 2.17)              | 57.8 (44.8 to 73.1)   | 0.79 (0.63 to 0.93)  |
|             | All    | 0.06 (-0.31 to 0.34)           | 3.9 (-17.2 to 20.7)    | 1.45 (1.03 to 2.18)              | 47.2 (42.6 to 50.9)   | 0.80 (0.71 to 0.88)  |
| South       | Winter | 0.05 (-0.22 to 0.39)           | 4.0 (-14.3 to 21.7)    | 1.16 (0.91 to 1.81)              | 50.5 (44.8 to 59.6)   | 0.69 (0.61 to 0.85)  |
|             | Spring | -0.23 (-0.52 to 0.25)          | -25.7 (-51.1 to 22.3)  | 0.79 (0.58 to 1.59)              | 60.5 (54.3 to 74.6)   | 0.74 (0.43 to 0.84)  |
|             | Summer | -0.17 (-0.30 to 0.40)          | -52.8 (-80.8 to 107.4) | 0.42 (0.29 to 1.90)              | 84.6 (59.5 to 186.5)  | 0.30 (0.11 to 0.46)  |
|             | Fall   | 0.06 (-0.01 to 0.66)           | 10.9 (-3.1 to 102.2)   | 0.61 (0.44 to 1.64)              | 79.3 (65.9 to 149.0)  | 0.63 (0.51 to 0.73)  |
|             | All    | -0.04 (-0.10 to 0.33)          | -6.5 (-13.1 to 31.3)   | 0.93 (0.66 to 1.40)              | 62.9 (58.0 to 79.4)   | 0.72 (0.45 to 0.79)  |
| SW          | Winter | -1.99 (-3.10 to -0.79)         | -55.6 (-70.5 to -39.3) | 4.41 (2.05 to 6.96)              | 66.3 (58.6 to 75.1)   | 0.50 (0.32 to 0.71)  |
|             | Spring | -0.31 (-0.55 to -0.13)         | -38.4 (-58.0 to -22.5) | 0.89 (0.52 to 1.22)              | 62.6 (50.8 to 73.4)   | 0.59 (0.34 to 0.77)  |
|             | Summer | -0.21 (-0.35 to -0.03)         | -53.3 (-85.6 to -8.8)  | 0.42 (0.37 to 0.65)              | 85.2 (82.3 to 118.1)  | 0.21 (-0.09 to 0.57) |
|             | Fall   | -0.30 (-0.57 to 0.29)          | -39.6 (-50.4 to 40.7)  | 1.22 (0.89 to 1.65)              | 71.5 (61.5 to 127.0)  | 0.53 (0.16 to 0.71)  |
|             | All    | -0.70 (-1.12 to -0.32)         | -52.6 (-65.7 to -29.1) | 2.28 (1.18 to 3.53)              | 68.4 (65.4 to 81.0)   | 0.57 (0.48 to 0.70)  |
| NRP         | Winter | -0.26 (-1.21 to 0.72)          | -12.6 (-32.8 to 34.6)  | 1.80 (1.06 to 2.80)              | 49.8 (40.5 to 70.6)   | 0.71 (0.68 to 0.86)  |
|             | Spring | -0.33 (-0.81 to -0.05)         | -23.8 (-58.0 to -6.3)  | 1.00 (0.74 to 2.42)              | 49.8 (40.0 to 66.5)   | 0.80 (0.64 to 0.93)  |
|             | Summer | -0.16 (-0.18 to 0.04)          | -40.8 (-57.9 to 14.2)  | 0.36 (0.31 to 0.87)              | 75.8 (64.1 to 95.7)   | 0.51 (0.24 to 0.63)  |
|             | Fall   | 0.37 (-0.03 to 0.71)           | 47.9 (-5.2 to 82.5)    | 1.20 (0.47 to 1.56)              | 86.5 (50.8 to 111.1)  | 0.79 (0.62 to 0.90)  |
|             | All    | -0.14 (-0.34 to 0.27)          | -10.6 (-34.3 to 26.0)  | 1.30 (0.81 to 1.95)              | 59.0 (45.2 to 72.8)   | 0.76 (0.64 to 0.88)  |
| NW          | Winter | -0.27 (-1.05 to 0.62)          | -16.2 (-38.4 to 36.0)  | 1.87 (1.17 to 7.14)              | 75.5 (60.5 to 96.8)   | 0.36 (0.24 to 0.61)  |
|             | Spring | 0.24 (-0.09 to 0.59)           | 56.1 (-12.6 to 106.7)  | 0.97 (0.46 to 1.64)              | 89.8 (57.3 to 146.2)  | 0.58 (0.37 to 0.71)  |
|             | Summer | -0.01 (-0.28 to 0.69)          | -1.6 (-70.2 to 224.1)  | 0.53 (0.32 to 2.63)              | 90.6 (67.7 to 278.0)  | 0.35 (0.16 to 0.54)  |
|             | Fall   | 0.26 (-0.10 to 0.62)           | 19.7 (-9.7 to 96.8)    | 1.35 (0.85 to 2.52)              | 87.4 (65.9 to 132.5)  | 0.44 (0.29 to 0.55)  |
|             | All    | 0.10 (-0.29 to 0.54)           | 11.0 (-28.9 to 70.5)   | 1.26 (0.86 to 3.48)              | 87.0 (66.1 to 121.8)  | 0.41 (0.28 to 0.57)  |
| West        | Winter | -1.82 (-2.93 to -1.16)         | -41.8 (-60.2 to -31.0) | 4.86 (3.50 to 5.94)              | 57.9 (48.4 to 67.6)   | 0.63 (0.47 to 0.78)  |
|             | Spring | -0.61 (-1.19 to -0.10)         | -39.3 (-53.3 to -6.4)  | 1.82 (1.25 to 3.23)              | 53.9 (47.3 to 59.3)   | 0.74 (0.64 to 0.79)  |
|             | Summer | -0.48 (-0.97 to -0.27)         | -32.9 (-62.2 to -14.2) | 1.47 (1.01 to 2.38)              | 54.7 (42.0 to 67.8)   | 0.78 (0.58 to 0.88)  |
|             | Fall   | -1.03 (-1.88 to -0.56)         | -40.7 (-52.8 to -29.9) | 2.91 (2.46 to 4.76)              | 57.8 (53.8 to 68.7)   | 0.62 (0.48 to 0.83)  |
|             | All    | -0.96 (-1.45 to -0.70)         | -40.3 (-52.2 to -29.6) | 3.02 (2.33 to 4.20)              | 58.0 (49.2 to 62.5)   | 0.67 (0.60 to 0.77)  |
| All         | Winter | -0.08 (-0.52 to 0.47)          | -3.9 (-17.1 to 20.5)   | 2.56 (1.84 to 3.12)              | 50.7 (48.3 to 61.9)   | 0.61 (0.54 to 0.68)  |
|             | Spring | -0.15 (-0.35 to 0.27)          | -13.5 (-28.5 to 18.5)  | 1.17 (0.95 to 1.80)              | 55.6 (50.8 to 71.3)   | 0.69 (0.62 to 0.77)  |
|             | Summer | -0.14 (-0.25 to 0.08)          | -25.7 (-47.6 to 14.8)  | 0.69 (0.58 to 1.19)              | 69.7 (64.6 to 94.0)   | 0.57 (0.29 to 0.82)  |
|             | Fall   | 0.19 (0.08 to 0.43)            | 19.8 ( 9.1 to 35.5)    | 1.37 (1.07 to 2.26)              | 72.8 (66.9 to 82.2)   | 0.61 (0.51 to 0.78)  |
|             | All    | -0.05 (-0.15 to 0.12)          | -4.8 (-10.4 to 9.4)    | 1.60 (1.25 to 2.18)              | 61.1 (55.2 to 65.3)   | 0.66 (0.62 to 0.71)  |

Table S5. Median (range) of performance statistics for PM<sub>2.5</sub> nitrate at IMPROVE sites for years 2007-2015.

| Region      | Season | MB<br>( $\mu\text{g m}^{-3}$ ) | NMB<br>(%)             | RMSE<br>( $\mu\text{g m}^{-3}$ ) | NME<br>(%)             | <i>r</i>             |
|-------------|--------|--------------------------------|------------------------|----------------------------------|------------------------|----------------------|
| NE          | Winter | 0.66 (0.41 to 1.15)            | 92.2 (59.7 to 194.6)   | 1.12 (0.88 to 1.87)              | 110.5 (81.5 to 200.7)  | 0.71 (0.58 to 0.80)  |
|             | Spring | 0.08 (-0.01 to 0.48)           | 18.6 (-4.2 to 89.2)    | 0.55 (0.38 to 1.24)              | 90.7 (69.8 to 127.5)   | 0.64 (0.45 to 0.71)  |
|             | Summer | -0.02 (-0.08 to 0.09)          | -10.8 (-47.7 to 48.0)  | 0.25 (0.20 to 0.71)              | 84.6 (78.8 to 118.8)   | 0.38 (0.27 to 0.48)  |
|             | Fall   | 0.19 (0.07 to 0.49)            | 66.4 (26.0 to 112.0)   | 0.68 (0.33 to 1.28)              | 113.5 (90.9 to 147.1)  | 0.69 (0.50 to 0.82)  |
|             | All    | 0.19 (0.14 to 0.47)            | 50.8 (36.2 to 113.0)   | 0.73 (0.55 to 1.18)              | 95.5 (81.6 to 155.0)   | 0.69 (0.63 to 0.75)  |
| SE          | Winter | 0.42 (0.28 to 0.72)            | 65.2 (45.0 to 109.6)   | 1.07 (0.83 to 1.41)              | 108.6 (80.1 to 142.6)  | 0.65 (0.58 to 0.68)  |
|             | Spring | -0.01 (-0.17 to 0.24)          | -1.5 (-43.4 to 40.9)   | 0.53 (0.41 to 1.22)              | 90.1 (58.0 to 122.1)   | 0.57 (0.44 to 0.68)  |
|             | Summer | -0.07 (-0.15 to 0.27)          | -32.2 (-66.3 to 129.3) | 0.30 (0.21 to 1.11)              | 87.2 (63.4 to 163.5)   | 0.18 (-0.07 to 0.42) |
|             | Fall   | 0.17 (0.11 to 0.61)            | 66.1 (52.4 to 145.9)   | 0.72 (0.37 to 1.45)              | 132.2 (98.4 to 198.5)  | 0.62 (0.47 to 0.76)  |
|             | All    | 0.14 (0.09 to 0.27)            | 32.9 (22.8 to 56.3)    | 0.76 (0.51 to 1.11)              | 106.0 (76.5 to 129.2)  | 0.64 (0.51 to 0.68)  |
| Ohio Valley | Winter | 0.21 (-0.40 to 0.47)           | 10.8 (-22.6 to 30.2)   | 1.39 (1.02 to 1.86)              | 54.2 (47.2 to 66.9)    | 0.64 (0.59 to 0.72)  |
|             | Spring | 0.01 (-0.46 to 0.83)           | 3.1 (-47.0 to 77.5)    | 1.01 (0.57 to 1.97)              | 74.9 (51.2 to 106.7)   | 0.60 (0.47 to 0.71)  |
|             | Summer | -0.02 (-0.14 to 0.36)          | -6.5 (-63.5 to 139.8)  | 0.27 (0.19 to 1.39)              | 79.0 (53.8 to 187.4)   | 0.38 (0.22 to 0.64)  |
|             | Fall   | 0.48 (-0.01 to 1.04)           | 79.6 (-1.8 to 140.1)   | 1.15 (0.36 to 1.82)              | 110.8 (70.7 to 158.2)  | 0.70 (0.47 to 0.80)  |
|             | All    | 0.12 (-0.12 to 0.57)           | 14.5 (-13.8 to 60.5)   | 1.14 (0.69 to 1.51)              | 69.0 (54.7 to 92.1)    | 0.71 (0.48 to 0.77)  |
| MW          | Winter | 0.16 (-0.65 to 0.69)           | 6.0 (-23.4 to 35.3)    | 1.62 (0.91 to 2.15)              | 47.0 (36.6 to 64.1)    | 0.79 (0.72 to 0.87)  |
|             | Spring | 0.02 (-0.55 to 0.35)           | 2.3 (-44.2 to 28.6)    | 0.87 (0.82 to 1.64)              | 52.2 (41.9 to 65.4)    | 0.80 (0.64 to 0.88)  |
|             | Summer | 0.02 (-0.11 to 0.21)           | 12.8 (-55.1 to 76.7)   | 0.33 (0.20 to 0.72)              | 75.7 (62.5 to 118.5)   | 0.64 (0.42 to 0.83)  |
|             | Fall   | 0.67 (0.05 to 0.91)            | 84.4 ( 7.2 to 113.1)   | 1.38 (0.56 to 1.95)              | 99.0 (66.4 to 133.3)   | 0.77 (0.64 to 0.89)  |
|             | All    | 0.12 (-0.16 to 0.33)           | 12.2 (-16.6 to 36.0)   | 1.22 (0.73 to 1.58)              | 57.8 (45.1 to 71.7)    | 0.80 (0.67 to 0.86)  |
| South       | Winter | -0.08 (-0.34 to 0.16)          | -3.9 (-29.4 to 10.4)   | 1.15 (0.83 to 1.44)              | 49.7 (45.7 to 69.1)    | 0.75 (0.50 to 0.86)  |
|             | Spring | -0.08 (-0.41 to 0.20)          | -16.3 (-55.4 to 20.6)  | 0.78 (0.49 to 1.09)              | 63.4 (43.8 to 81.0)    | 0.75 (0.41 to 0.92)  |
|             | Summer | -0.12 (-0.23 to 0.15)          | -53.1 (-85.6 to 56.4)  | 0.27 (0.19 to 1.21)              | 88.0 (54.8 to 149.9)   | 0.22 (0.02 to 0.57)  |
|             | Fall   | 0.14 (-0.01 to 0.61)           | 43.1 (-3.8 to 158.3)   | 0.58 (0.35 to 1.42)              | 98.3 (69.8 to 196.8)   | 0.70 (0.35 to 0.78)  |
|             | All    | -0.03 (-0.26 to 0.22)          | -5.8 (-37.8 to 28.3)   | 0.85 (0.57 to 1.05)              | 66.8 (53.2 to 74.6)    | 0.78 (0.45 to 0.83)  |
| SW          | Winter | -0.11 (-0.16 to -0.03)         | -33.2 (-44.8 to -13.6) | 0.47 (0.33 to 0.64)              | 68.1 (63.0 to 74.4)    | 0.65 (0.57 to 0.77)  |
|             | Spring | -0.10 (-0.19 to -0.06)         | -48.2 (-79.6 to -26.9) | 0.24 (0.20 to 0.32)              | 78.8 (68.2 to 82.7)    | 0.38 (0.24 to 0.51)  |
|             | Summer | -0.13 (-0.16 to -0.08)         | -81.8 (-87.6 to -51.1) | 0.20 (0.13 to 0.33)              | 86.9 (67.2 to 104.5)   | 0.25 (0.14 to 0.47)  |
|             | Fall   | -0.02 (-0.07 to 0.04)          | -16.1 (-48.1 to 31.1)  | 0.22 (0.17 to 0.55)              | 92.5 (73.5 to 128.8)   | 0.40 (0.33 to 0.54)  |
|             | All    | -0.09 (-0.17 to -0.05)         | -44.5 (-67.9 to -24.7) | 0.31 (0.23 to 0.42)              | 78.6 (71.3 to 87.4)    | 0.58 (0.51 to 0.67)  |
| NRP         | Winter | 0.22 (-0.09 to 0.44)           | 29.7 (-26.6 to 124.4)  | 0.99 (0.48 to 1.52)              | 76.2 (57.8 to 173.2)   | 0.60 (0.41 to 0.76)  |
|             | Spring | -0.00 (-0.23 to 0.12)          | -1.0 (-64.8 to 39.4)   | 0.49 (0.25 to 0.64)              | 69.4 (55.9 to 89.9)    | 0.71 (0.59 to 0.83)  |
|             | Summer | -0.06 (-0.07 to 0.09)          | -56.6 (-75.6 to 59.5)  | 0.17 (0.12 to 0.85)              | 83.5 (78.4 to 152.8)   | 0.41 (0.28 to 0.53)  |
|             | Fall   | 0.20 (0.04 to 0.29)            | 111.4 (29.6 to 143.1)  | 0.60 (0.31 to 0.79)              | 147.0 (100.1 to 188.0) | 0.70 (0.35 to 0.83)  |
|             | All    | 0.12 (-0.13 to 0.17)           | 30.7 (-46.7 to 65.5)   | 0.66 (0.43 to 0.85)              | 90.7 (67.6 to 115.3)   | 0.66 (0.37 to 0.74)  |
| NW          | Winter | 0.03 (-0.13 to 0.13)           | 10.3 (-44.7 to 37.3)   | 0.75 (0.30 to 1.34)              | 92.6 (82.6 to 138.2)   | 0.43 (0.27 to 0.73)  |
|             | Spring | 0.03 (-0.01 to 0.16)           | 16.6 (-5.3 to 117.5)   | 0.41 (0.29 to 0.75)              | 105.0 (75.7 to 155.7)  | 0.63 (0.48 to 0.71)  |
|             | Summer | 0.01 (-0.12 to 0.17)           | 4.4 (-69.5 to 129.7)   | 0.38 (0.17 to 1.52)              | 105.4 (79.3 to 227.6)  | 0.45 (0.29 to 0.61)  |
|             | Fall   | 0.13 (-0.02 to 0.24)           | 71.4 (-7.7 to 117.0)   | 0.68 (0.36 to 0.79)              | 144.4 (89.6 to 160.6)  | 0.50 (0.39 to 0.63)  |
|             | All    | 0.05 (-0.06 to 0.15)           | 19.9 (-30.1 to 75.8)   | 0.59 (0.41 to 1.00)              | 111.2 (84.0 to 149.3)  | 0.43 (0.28 to 0.60)  |
| West        | Winter | -0.23 (-0.53 to -0.00)         | -34.4 (-46.1 to -0.1)  | 1.67 (0.82 to 2.47)              | 68.2 (51.2 to 79.6)    | 0.75 (0.58 to 0.91)  |
|             | Spring | -0.23 (-0.32 to -0.05)         | -37.7 (-51.6 to -11.6) | 0.56 (0.52 to 1.04)              | 68.5 (56.9 to 73.1)    | 0.58 (0.48 to 0.68)  |
|             | Summer | -0.22 (-0.34 to 0.09)          | -58.8 (-66.6 to 24.2)  | 0.43 (0.39 to 0.77)              | 76.9 (69.9 to 83.7)    | 0.51 (0.31 to 0.66)  |
|             | Fall   | -0.24 (-0.47 to 0.02)          | -42.1 (-55.7 to 4.9)   | 1.14 (0.76 to 2.17)              | 76.4 (71.7 to 82.2)    | 0.62 (0.50 to 0.71)  |
|             | All    | -0.23 (-0.41 to 0.00)          | -39.8 (-48.3 to 0.3)   | 1.01 (0.63 to 1.72)              | 73.2 (65.0 to 74.4)    | 0.68 (0.58 to 0.84)  |
| All         | Winter | 0.11 (-0.06 to 0.23)           | 11.0 (-8.0 to 32.7)    | 1.17 (0.89 to 1.43)              | 70.1 (62.1 to 92.1)    | 0.70 (0.58 to 0.77)  |
|             | Spring | -0.02 (-0.16 to 0.09)          | -4.1 (-37.3 to 15.5)   | 0.60 (0.46 to 0.98)              | 73.7 (66.1 to 86.9)    | 0.68 (0.51 to 0.75)  |
|             | Summer | -0.08 (-0.12 to 0.04)          | -40.6 (-61.1 to 17.6)  | 0.35 (0.24 to 0.67)              | 86.5 (80.5 to 114.1)   | 0.37 (0.17 to 0.51)  |
|             | Fall   | 0.10 (0.03 to 0.25)            | 37.0 (10.4 to 67.6)    | 0.82 (0.52 to 1.26)              | 102.8 (91.3 to 129.7)  | 0.57 (0.45 to 0.69)  |
|             | All    | 0.03 (-0.07 to 0.11)           | 6.6 (-17.3 to 22.0)    | 0.83 (0.60 to 1.09)              | 81.2 (70.9 to 89.0)    | 0.66 (0.56 to 0.72)  |

Table S6. Median (range) of performance statistics for PM<sub>2.5</sub> OC at CSN sites for years 2007-2015.

| Region      | Season | MB<br>( $\mu\text{g m}^{-3}$ ) | NMB<br>(%)             | RMSE<br>( $\mu\text{g m}^{-3}$ ) | NME<br>(%)            | <i>r</i>              |
|-------------|--------|--------------------------------|------------------------|----------------------------------|-----------------------|-----------------------|
| NE          | Winter | 1.76 (0.84 to 3.69)            | 116.1 (44.8 to 231.7)  | 2.46 (1.91 to 6.49)              | 122.4 (62.9 to 233.9) | 0.61 (0.38 to 0.76)   |
|             | Spring | 0.38 (-0.44 to 2.15)           | 24.3 (-24.5 to 192.8)  | 1.58 (1.15 to 4.60)              | 59.8 (48.4 to 199.4)  | 0.49 (0.34 to 0.64)   |
|             | Summer | -0.73 (-2.06 to 1.43)          | -33.7 (-62.7 to 72.8)  | 1.92 (0.91 to 4.76)              | 42.0 (34.5 to 100.6)  | 0.49 (0.19 to 0.67)   |
|             | Fall   | 0.26 (-0.21 to 2.25)           | 17.4 (-10.0 to 183.3)  | 1.77 (1.01 to 5.45)              | 56.0 (38.7 to 188.6)  | 0.66 (0.31 to 0.74)   |
|             | All    | 0.40 (-0.47 to 2.27)           | 24.3 (-20.2 to 151.5)  | 1.90 (1.55 to 5.37)              | 62.6 (47.5 to 164.9)  | 0.46 (0.26 to 0.52)   |
| SE          | Winter | 0.44 (-0.34 to 1.61)           | 16.6 (-13.1 to 78.1)   | 2.19 (1.73 to 3.14)              | 56.4 (43.7 to 93.7)   | 0.52 (0.37 to 0.64)   |
|             | Spring | 0.00 (-1.31 to 0.96)           | 0.2 (-37.4 to 53.0)    | 1.68 (1.28 to 4.59)              | 50.9 (44.8 to 69.0)   | 0.53 (0.36 to 0.79)   |
|             | Summer | -0.23 (-1.96 to 1.00)          | -7.6 (-56.2 to 53.4)   | 1.94 (0.89 to 2.54)              | 52.8 (36.7 to 74.2)   | 0.50 (0.35 to 0.62)   |
|             | Fall   | -0.01 (-0.89 to 1.29)          | -0.4 (-38.3 to 68.2)   | 1.93 (1.21 to 2.45)              | 51.8 (39.0 to 86.7)   | 0.59 (0.46 to 0.68)   |
|             | All    | -0.05 (-0.97 to 1.14)          | -1.9 (-36.0 to 61.9)   | 2.12 (1.52 to 3.06)              | 55.0 (42.5 to 78.9)   | 0.51 (0.42 to 0.65)   |
| Ohio Valley | Winter | 0.99 (0.22 to 2.32)            | 54.7 (11.7 to 145.4)   | 1.64 (1.21 to 3.37)              | 70.1 (38.0 to 152.3)  | 0.54 (0.41 to 0.63)   |
|             | Spring | 0.23 (-0.72 to 0.51)           | 15.4 (-35.6 to 34.7)   | 1.35 (1.10 to 2.13)              | 52.0 (39.0 to 60.1)   | 0.49 (0.40 to 0.69)   |
|             | Summer | -0.64 (-1.63 to 0.06)          | -30.2 (-57.7 to 3.3)   | 1.35 (0.88 to 2.07)              | 40.7 (30.7 to 59.8)   | 0.48 (0.36 to 0.61)   |
|             | Fall   | 0.21 (-0.59 to 1.06)           | 9.7 (-29.2 to 57.0)    | 1.56 (0.89 to 2.03)              | 43.7 (39.1 to 67.3)   | 0.63 (0.41 to 0.72)   |
|             | All    | 0.24 (-0.58 to 0.84)           | 12.5 (-26.0 to 48.6)   | 1.65 (1.18 to 1.95)              | 53.9 (39.2 to 69.8)   | 0.46 (0.42 to 0.54)   |
| MW          | Winter | 1.37 (0.58 to 2.51)            | 118.6 (33.9 to 199.3)  | 2.38 (1.69 to 3.39)              | 121.9 (59.1 to 203.1) | 0.52 (0.25 to 0.66)   |
|             | Spring | 0.33 (-0.39 to 1.10)           | 24.5 (-25.1 to 100.1)  | 1.34 (0.91 to 1.83)              | 69.0 (43.0 to 112.4)  | 0.48 (0.33 to 0.74)   |
|             | Summer | -0.80 (-1.87 to 0.22)          | -33.2 (-67.5 to 11.8)  | 1.39 (1.10 to 2.60)              | 43.3 (38.3 to 68.0)   | 0.48 (0.33 to 0.55)   |
|             | Fall   | 0.05 (-0.42 to 1.18)           | 3.0 (-23.8 to 85.2)    | 1.38 (0.88 to 2.05)              | 54.7 (38.7 to 90.9)   | 0.61 (0.52 to 0.73)   |
|             | All    | 0.28 (-0.52 to 1.19)           | 17.8 (-27.5 to 84.7)   | 1.76 (1.44 to 2.18)              | 65.4 (45.1 to 101.9)  | 0.39 (0.23 to 0.44)   |
| South       | Winter | 0.45 (-0.45 to 1.35)           | 25.9 (-22.6 to 85.7)   | 1.85 (1.36 to 4.07)              | 61.2 (41.1 to 109.3)  | 0.44 (0.20 to 0.62)   |
|             | Spring | -0.10 (-1.23 to 0.09)          | -5.0 (-58.4 to 5.3)    | 1.35 (1.07 to 3.89)              | 49.7 (42.1 to 62.2)   | 0.49 (0.18 to 0.63)   |
|             | Summer | -0.18 (-1.33 to 0.44)          | -11.1 (-56.5 to 29.9)  | 1.36 (0.79 to 2.27)              | 47.5 (36.2 to 67.1)   | 0.58 (0.20 to 0.65)   |
|             | Fall   | 0.44 (-1.15 to 0.72)           | 21.7 (-39.7 to 41.7)   | 1.61 (1.26 to 6.24)              | 55.7 (37.4 to 73.7)   | 0.53 (0.18 to 0.69)   |
|             | All    | 0.09 (-1.00 to 0.56)           | 4.1 (-45.3 to 32.1)    | 1.75 (1.35 to 4.14)              | 59.2 (40.0 to 64.7)   | 0.51 (0.23 to 0.63)   |
| SW          | Winter | 1.26 (-0.84 to 3.73)           | 56.6 (-24.3 to 202.7)  | 2.63 (2.00 to 5.39)              | 77.4 (49.9 to 213.9)  | 0.48 (0.16 to 0.55)   |
|             | Spring | 0.71 (-0.47 to 1.66)           | 93.8 (-26.0 to 256.5)  | 1.21 (0.95 to 2.24)              | 112.1 (46.8 to 261.0) | 0.46 (0.33 to 0.60)   |
|             | Summer | 0.08 (-0.87 to 0.30)           | 5.9 (-44.2 to 26.8)    | 1.54 (0.65 to 1.74)              | 51.9 (42.2 to 61.5)   | 0.50 (0.28 to 0.72)   |
|             | Fall   | 0.72 (-0.35 to 1.87)           | 57.7 (-14.3 to 140.2)  | 1.46 (1.16 to 3.03)              | 68.4 (39.1 to 146.6)  | 0.54 (0.38 to 0.63)   |
|             | All    | 0.76 (-0.49 to 1.83)           | 59.2 (-20.2 to 135.0)  | 1.73 (1.35 to 3.34)              | 77.0 (46.7 to 151.2)  | 0.55 (0.30 to 0.63)   |
| NRP         | Winter | -0.40 (-1.79 to 0.63)          | -24.1 (-61.9 to 61.4)  | 4.22 (1.95 to 4.51)              | 94.3 (70.2 to 130.6)  | -0.00 (-0.16 to 0.22) |
|             | Spring | -0.32 (-1.01 to 0.15)          | -22.8 (-61.3 to 17.3)  | 1.23 (0.66 to 2.12)              | 64.3 (56.8 to 76.6)   | 0.39 (-0.05 to 0.80)  |
|             | Summer | -0.86 (-1.77 to 0.17)          | -49.5 (-69.3 to 4.6)   | 1.84 (0.84 to 6.89)              | 58.1 (36.2 to 76.0)   | 0.60 (0.21 to 0.94)   |
|             | Fall   | -0.46 (-1.13 to 0.23)          | -29.7 (-55.8 to 14.9)  | 1.64 (1.22 to 3.54)              | 60.3 (55.0 to 67.7)   | 0.36 (0.20 to 0.76)   |
|             | All    | -0.48 (-1.25 to 0.02)          | -31.4 (-58.8 to 1.7)   | 2.24 (1.53 to 4.56)              | 70.2 (61.2 to 75.0)   | 0.25 (0.06 to 0.80)   |
| NW          | Winter | 2.26 (-1.69 to 6.05)           | 71.6 (-40.0 to 173.6)  | 5.22 (3.52 to 8.83)              | 101.5 (71.5 to 186.7) | 0.41 (0.17 to 0.57)   |
|             | Spring | 1.88 (-0.53 to 3.98)           | 142.1 (-26.9 to 505.3) | 3.99 (1.85 to 5.34)              | 165.0 (63.1 to 505.8) | 0.41 (0.23 to 0.67)   |
|             | Summer | 1.21 (-0.63 to 2.61)           | 66.4 (-23.7 to 257.2)  | 3.53 (0.68 to 5.40)              | 102.6 (41.1 to 268.3) | 0.51 (0.16 to 0.68)   |
|             | Fall   | 2.05 (-0.31 to 4.23)           | 77.4 (-10.7 to 167.4)  | 4.97 (2.53 to 7.70)              | 104.5 (63.7 to 173.6) | 0.45 (0.21 to 0.55)   |
|             | All    | 1.58 (-0.78 to 4.25)           | 76.5 (-23.4 to 195.6)  | 4.56 (2.39 to 6.48)              | 116.7 (66.9 to 206.3) | 0.41 (0.35 to 0.54)   |
| West        | Winter | -0.08 (-1.51 to 1.34)          | -2.1 (-30.2 to 41.3)   | 3.29 (1.90 to 4.89)              | 56.6 (32.1 to 64.8)   | 0.54 (0.13 to 0.69)   |
|             | Spring | -0.03 (-0.42 to 1.05)          | -1.7 (-18.8 to 80.2)   | 1.38 (0.82 to 1.72)              | 51.6 (31.1 to 89.9)   | 0.48 (0.24 to 0.78)   |
|             | Summer | -0.07 (-0.94 to 0.28)          | -4.2 (-34.0 to 17.6)   | 1.47 (0.85 to 4.49)              | 44.1 (37.6 to 52.6)   | 0.51 (0.26 to 0.90)   |
|             | Fall   | 0.10 (-0.75 to 1.04)           | 4.1 (-18.7 to 44.0)    | 2.20 (1.46 to 3.56)              | 46.8 (33.5 to 61.6)   | 0.59 (0.34 to 0.89)   |
|             | All    | -0.10 (-0.90 to 0.91)          | -2.6 (-24.1 to 42.6)   | 2.14 (1.62 to 3.39)              | 52.1 (33.6 to 61.6)   | 0.67 (0.30 to 0.74)   |
| All         | Winter | 0.89 (0.02 to 2.56)            | 43.3 (0.7 to 130.7)    | 2.77 (2.13 to 4.28)              | 79.0 (51.6 to 144.4)  | 0.46 (0.32 to 0.57)   |
|             | Spring | 0.40 (-0.62 to 0.95)           | 25.3 (-31.2 to 68.7)   | 1.66 (1.51 to 2.71)              | 59.8 (46.6 to 91.6)   | 0.43 (0.23 to 0.64)   |
|             | Summer | -0.43 (-1.53 to 0.53)          | -23.6 (-50.5 to 28.9)  | 1.90 (1.13 to 2.72)              | 47.5 (41.2 to 66.8)   | 0.49 (0.26 to 0.64)   |
|             | Fall   | 0.16 (-0.51 to 1.23)           | 8.1 (-24.0 to 70.6)    | 2.20 (1.57 to 3.27)              | 56.0 (41.8 to 87.6)   | 0.56 (0.36 to 0.62)   |
|             | All    | 0.24 (-0.64 to 1.13)           | 13.2 (-25.3 to 64.5)   | 2.34 (1.74 to 3.05)              | 58.4 (45.4 to 88.8)   | 0.47 (0.35 to 0.55)   |

Table S7. Median (range) of performance statistics for PM<sub>2.5</sub> OC at IMPROVE sites for years 2007-2015.

| Region      | Season | MB<br>( $\mu\text{g m}^{-3}$ ) | NMB<br>(%)             | RMSE<br>( $\mu\text{g m}^{-3}$ ) | NME<br>(%)            | <i>r</i>            |
|-------------|--------|--------------------------------|------------------------|----------------------------------|-----------------------|---------------------|
| NE          | Winter | 0.75 (0.24 to 1.16)            | 76.2 (23.1 to 130.3)   | 1.54 (1.11 to 1.96)              | 89.4 (61.6 to 137.5)  | 0.62 (0.47 to 0.78) |
|             | Spring | 0.18 (-0.25 to 0.37)           | 21.2 (-28.1 to 58.7)   | 0.86 (0.67 to 1.35)              | 59.3 (53.4 to 81.2)   | 0.54 (0.26 to 0.65) |
|             | Summer | -0.60 (-1.03 to -0.30)         | -41.0 (-61.9 to -22.3) | 0.96 (0.55 to 1.61)              | 48.3 (36.3 to 67.4)   | 0.56 (0.33 to 0.74) |
|             | Fall   | 0.11 (-0.18 to 0.36)           | 11.3 (-19.2 to 47.0)   | 0.84 (0.51 to 1.05)              | 54.0 (41.6 to 71.3)   | 0.67 (0.52 to 0.73) |
|             | All    | 0.15 (-0.25 to 0.35)           | 13.6 (-22.1 to 39.2)   | 1.13 (0.91 to 1.35)              | 62.9 (55.4 to 75.0)   | 0.49 (0.32 to 0.61) |
| SE          | Winter | 0.55 (-0.06 to 0.99)           | 40.2 (-4.3 to 77.9)    | 2.18 (1.50 to 2.93)              | 72.4 (66.3 to 97.4)   | 0.44 (0.36 to 0.62) |
|             | Spring | -0.18 (-1.17 to 0.74)          | -12.6 (-45.0 to 54.3)  | 2.24 (0.96 to 5.73)              | 56.9 (50.4 to 83.1)   | 0.46 (0.07 to 0.73) |
|             | Summer | -0.63 (-1.23 to 0.36)          | -33.1 (-58.7 to 24.5)  | 1.46 (0.87 to 2.33)              | 55.1 (45.6 to 71.2)   | 0.60 (0.49 to 0.73) |
|             | Fall   | -0.00 (-0.50 to 0.64)          | -0.3 (-40.6 to 47.2)   | 1.30 (0.85 to 2.27)              | 55.3 (41.5 to 76.6)   | 0.68 (0.33 to 0.73) |
|             | All    | -0.14 (-0.56 to 0.59)          | -7.8 (-32.6 to 44.1)   | 2.03 (1.16 to 3.26)              | 59.8 (51.7 to 76.9)   | 0.44 (0.19 to 0.64) |
| Ohio Valley | Winter | 0.39 (-0.16 to 0.69)           | 41.6 (-15.3 to 64.4)   | 1.05 (0.61 to 1.43)              | 65.6 (36.5 to 84.7)   | 0.54 (0.43 to 0.73) |
|             | Spring | -0.28 (-0.60 to 0.44)          | -19.8 (-47.5 to 37.1)  | 1.07 (0.61 to 6.33)              | 53.0 (42.0 to 77.4)   | 0.58 (0.12 to 0.69) |
|             | Summer | -0.56 (-1.05 to -0.01)         | -29.9 (-56.3 to -1.0)  | 0.99 (0.74 to 1.76)              | 44.3 (35.5 to 58.3)   | 0.59 (0.34 to 0.75) |
|             | Fall   | -0.01 (-0.56 to 0.43)          | -0.6 (-43.5 to 36.3)   | 1.10 (0.69 to 1.24)              | 45.5 (40.2 to 58.0)   | 0.68 (0.55 to 0.80) |
|             | All    | -0.05 (-0.51 to 0.28)          | -3.4 (-37.8 to 24.3)   | 1.12 (0.78 to 3.38)              | 50.4 (45.7 to 57.6)   | 0.54 (0.21 to 0.58) |
| MW          | Winter | 0.44 (-0.07 to 0.86)           | 66.2 (-9.0 to 135.8)   | 0.75 (0.33 to 1.35)              | 73.6 (35.3 to 141.0)  | 0.76 (0.50 to 0.85) |
|             | Spring | 0.04 (-0.50 to 0.29)           | 4.5 (-53.8 to 34.3)    | 0.97 (0.56 to 3.14)              | 58.8 (51.1 to 70.7)   | 0.53 (0.11 to 0.67) |
|             | Summer | -0.67 (-1.16 to -0.39)         | -42.9 (-75.0 to -29.1) | 1.10 (0.84 to 1.68)              | 53.5 (43.7 to 75.5)   | 0.43 (0.16 to 0.65) |
|             | Fall   | -0.03 (-0.45 to 0.40)          | -4.3 (-52.1 to 50.3)   | 0.63 (0.52 to 5.14)              | 46.2 (42.3 to 76.0)   | 0.71 (0.60 to 0.82) |
|             | All    | -0.04 (-0.45 to 0.19)          | -3.9 (-46.6 to 21.3)   | 1.02 (0.95 to 2.72)              | 57.4 (50.9 to 70.4)   | 0.38 (0.18 to 0.68) |
| South       | Winter | 0.24 (-0.24 to 1.46)           | 32.8 (-33.2 to 192.7)  | 1.26 (0.61 to 16.61)             | 63.9 (46.7 to 227.6)  | 0.57 (0.29 to 0.72) |
|             | Spring | -0.40 (-0.81 to -0.22)         | -31.2 (-66.6 to -20.2) | 1.21 (0.69 to 5.52)              | 57.1 (47.2 to 69.8)   | 0.66 (0.22 to 0.74) |
|             | Summer | -0.47 (-0.76 to -0.15)         | -31.8 (-58.2 to -12.8) | 0.84 (0.61 to 1.01)              | 49.2 (41.7 to 60.8)   | 0.65 (0.57 to 0.69) |
|             | Fall   | -0.08 (-0.51 to 0.24)          | -8.1 (-50.5 to 18.3)   | 0.91 (0.54 to 2.27)              | 49.5 (37.5 to 65.9)   | 0.66 (0.32 to 0.79) |
|             | All    | -0.19 (-0.51 to 0.18)          | -15.5 (-47.9 to 17.3)  | 1.03 (0.81 to 7.89)              | 52.0 (47.4 to 79.6)   | 0.53 (0.18 to 0.64) |
| SW          | Winter | -0.04 (-0.21 to 0.13)          | -8.0 (-34.6 to 25.5)   | 0.64 (0.50 to 0.97)              | 54.9 (52.0 to 72.9)   | 0.80 (0.62 to 0.87) |
|             | Spring | -0.11 (-0.37 to 0.03)          | -25.8 (-59.7 to 8.3)   | 0.55 (0.32 to 1.56)              | 55.3 (43.3 to 71.2)   | 0.62 (0.19 to 0.73) |
|             | Summer | -0.33 (-0.65 to -0.10)         | -36.6 (-58.9 to -17.6) | 0.85 (0.44 to 5.10)              | 59.8 (48.7 to 73.1)   | 0.44 (0.16 to 0.76) |
|             | Fall   | -0.06 (-0.29 to 0.04)          | -9.7 (-36.7 to 6.2)    | 0.99 (0.66 to 3.90)              | 57.3 (51.2 to 73.1)   | 0.47 (0.10 to 0.72) |
|             | All    | -0.12 (-0.34 to -0.05)         | -19.4 (-45.1 to -8.3)  | 1.18 (0.54 to 2.71)              | 57.2 (50.4 to 69.0)   | 0.55 (0.21 to 0.72) |
| NRP         | Winter | -0.02 (-0.16 to 0.09)          | -6.4 (-40.9 to 29.0)   | 0.39 (0.26 to 0.82)              | 61.8 (52.8 to 88.2)   | 0.26 (0.13 to 0.48) |
|             | Spring | -0.12 (-0.47 to -0.07)         | -30.6 (-76.9 to -15.6) | 0.59 (0.33 to 2.21)              | 64.1 (50.5 to 88.5)   | 0.57 (0.07 to 0.97) |
|             | Summer | -0.51 (-0.72 to 0.69)          | -37.9 (-68.5 to 25.5)  | 1.80 (1.17 to 13.66)             | 64.8 (58.0 to 91.7)   | 0.49 (0.24 to 0.77) |
|             | Fall   | -0.16 (-0.44 to 0.32)          | -14.6 (-52.5 to 27.7)  | 1.87 (0.68 to 5.45)              | 62.5 (53.3 to 88.0)   | 0.62 (0.26 to 0.78) |
|             | All    | -0.24 (-0.38 to 0.19)          | -33.4 (-56.1 to 15.4)  | 1.46 (1.00 to 7.16)              | 64.6 (55.5 to 85.1)   | 0.60 (0.23 to 0.77) |
| NW          | Winter | 0.31 (0.10 to 0.40)            | 61.7 (17.5 to 98.5)    | 1.68 (1.42 to 2.51)              | 127.3 (99.9 to 162.7) | 0.61 (0.18 to 0.69) |
|             | Spring | 0.23 (-0.21 to 0.45)           | 39.0 (-32.6 to 141.7)  | 1.92 (0.79 to 2.29)              | 119.5 (75.3 to 186.1) | 0.53 (0.31 to 0.60) |
|             | Summer | 0.10 (-0.65 to 0.58)           | 7.2 (-45.9 to 60.7)    | 2.95 (1.17 to 10.21)             | 89.3 (61.3 to 137.4)  | 0.44 (0.31 to 0.71) |
|             | Fall   | 0.67 (0.01 to 1.62)            | 46.2 (1.8 to 152.4)    | 3.65 (1.34 to 23.81)             | 103.5 (73.6 to 224.7) | 0.49 (0.14 to 0.58) |
|             | All    | 0.32 (-0.08 to 0.71)           | 31.8 (-9.4 to 65.4)    | 2.67 (1.42 to 13.08)             | 107.0 (78.8 to 127.7) | 0.47 (0.30 to 0.56) |
| West        | Winter | 0.01 (-0.10 to 0.31)           | 1.7 (-15.4 to 35.1)    | 0.71 (0.54 to 2.63)              | 59.2 (48.5 to 81.5)   | 0.83 (0.56 to 0.90) |
|             | Spring | -0.24 (-0.42 to 0.04)          | -32.3 (-50.3 to 8.0)   | 0.55 (0.45 to 1.53)              | 54.8 (52.2 to 58.4)   | 0.59 (0.20 to 0.65) |
|             | Summer | -0.27 (-0.87 to 0.60)          | -21.4 (-47.8 to 21.3)  | 2.32 (0.64 to 4.82)              | 64.7 (42.2 to 75.1)   | 0.65 (0.23 to 0.84) |
|             | Fall   | 0.12 (-0.29 to 0.32)           | 10.2 (-24.0 to 28.1)   | 3.54 (1.86 to 4.78)              | 71.7 (62.2 to 90.5)   | 0.37 (0.20 to 0.75) |
|             | All    | -0.07 (-0.36 to 0.18)          | -6.6 (-33.1 to 12.7)   | 2.45 (1.38 to 3.29)              | 63.7 (54.9 to 74.9)   | 0.55 (0.28 to 0.73) |
| All         | Winter | 0.27 (0.01 to 0.37)            | 44.0 (1.2 to 54.9)     | 1.30 (1.05 to 4.21)              | 82.0 (62.8 to 88.9)   | 0.58 (0.28 to 0.68) |
|             | Spring | -0.03 (-0.45 to 0.11)          | -4.4 (-49.3 to 16.4)   | 1.23 (0.96 to 2.62)              | 61.7 (59.6 to 72.0)   | 0.45 (0.13 to 0.52) |
|             | Summer | -0.30 (-0.71 to -0.09)         | -23.3 (-55.1 to -5.4)  | 2.17 (0.98 to 6.37)              | 63.3 (52.7 to 69.7)   | 0.55 (0.21 to 0.70) |
|             | Fall   | 0.10 (-0.30 to 0.23)           | 11.2 (-31.3 to 22.0)   | 2.49 (1.34 to 8.14)              | 65.3 (52.2 to 79.3)   | 0.50 (0.17 to 0.67) |
|             | All    | -0.05 (-0.31 to 0.09)          | -4.7 (-32.6 to 9.8)    | 1.93 (1.25 to 5.74)              | 66.3 (56.7 to 72.1)   | 0.48 (0.28 to 0.60) |



Table S8. Median (range) of performance statistics for PM<sub>2.5</sub> EC at CSN sites for years 2007-2015.

| Region      | Season | MB<br>( $\mu\text{g m}^{-3}$ ) | NMB<br>(%)             | RMSE<br>( $\mu\text{g m}^{-3}$ ) | NME<br>(%)             | <i>r</i>             |
|-------------|--------|--------------------------------|------------------------|----------------------------------|------------------------|----------------------|
| NE          | Winter | 0.32 (0.25 to 0.78)            | 55.3 (33.0 to 110.4)   | 0.78 (0.61 to 1.24)              | 71.8 (61.2 to 121.3)   | 0.63 (0.52 to 0.69)  |
|             | Spring | 0.15 (0.08 to 0.36)            | 27.4 (12.2 to 75.9)    | 0.60 (0.46 to 0.71)              | 59.1 (49.9 to 94.4)    | 0.61 (0.48 to 0.66)  |
|             | Summer | 0.13 (-0.07 to 0.25)           | 21.3 (-10.5 to 37.4)   | 0.60 (0.46 to 0.76)              | 51.4 (40.1 to 64.8)    | 0.53 (0.40 to 0.58)  |
|             | Fall   | 0.21 (-0.07 to 0.44)           | 29.4 (-7.1 to 61.9)    | 0.80 (0.56 to 1.03)              | 57.1 (47.9 to 78.2)    | 0.58 (0.35 to 0.76)  |
|             | All    | 0.19 (0.09 to 0.44)            | 28.4 (11.6 to 66.4)    | 0.71 (0.53 to 0.90)              | 58.3 (53.1 to 84.8)    | 0.56 (0.50 to 0.65)  |
| SE          | Winter | 0.26 (0.10 to 0.52)            | 42.3 (13.2 to 73.0)    | 0.60 (0.50 to 0.90)              | 64.6 (50.6 to 90.3)    | 0.50 (0.41 to 0.61)  |
|             | Spring | 0.16 (-0.04 to 0.34)           | 33.5 (-6.0 to 60.6)    | 0.49 (0.36 to 0.59)              | 63.3 (41.8 to 79.2)    | 0.54 (0.44 to 0.73)  |
|             | Summer | 0.14 (-0.02 to 0.47)           | 26.9 (-3.0 to 104.3)   | 0.45 (0.33 to 0.74)              | 60.6 (48.9 to 121.1)   | 0.41 (0.17 to 0.53)  |
|             | Fall   | 0.23 (-0.14 to 0.50)           | 36.0 (-16.3 to 82.3)   | 0.57 (0.45 to 0.87)              | 57.4 (45.8 to 95.6)    | 0.58 (0.33 to 0.65)  |
|             | All    | 0.19 (-0.02 to 0.44)           | 32.6 (-2.9 to 70.2)    | 0.53 (0.44 to 0.77)              | 57.9 (47.6 to 88.2)    | 0.52 (0.43 to 0.62)  |
| Ohio Valley | Winter | 0.35 (0.12 to 0.71)            | 67.7 (18.5 to 126.1)   | 0.67 (0.45 to 0.99)              | 87.5 (56.1 to 134.2)   | 0.48 (0.38 to 0.56)  |
|             | Spring | 0.13 (-0.09 to 0.37)           | 25.9 (-13.0 to 65.2)   | 0.44 (0.40 to 0.64)              | 55.7 (41.8 to 81.6)    | 0.51 (0.38 to 0.67)  |
|             | Summer | 0.07 (-0.07 to 0.38)           | 11.0 (-9.9 to 49.3)    | 0.42 (0.37 to 0.74)              | 48.5 (39.8 to 68.6)    | 0.52 (0.44 to 0.63)  |
|             | Fall   | 0.18 (-0.12 to 0.47)           | 27.8 (-13.6 to 70.3)   | 0.63 (0.41 to 0.82)              | 52.7 (45.0 to 83.1)    | 0.61 (0.32 to 0.66)  |
|             | All    | 0.19 (-0.05 to 0.48)           | 34.6 (-6.2 to 72.4)    | 0.54 (0.43 to 0.79)              | 61.5 (45.4 to 86.7)    | 0.54 (0.43 to 0.57)  |
| MW          | Winter | 0.38 (0.21 to 0.70)            | 92.8 (45.5 to 173.8)   | 0.62 (0.48 to 0.99)              | 103.5 (71.3 to 176.3)  | 0.56 (0.44 to 0.71)  |
|             | Spring | 0.20 (-0.02 to 0.46)           | 48.9 (-3.3 to 112.0)   | 0.41 (0.32 to 0.76)              | 67.1 (48.6 to 119.0)   | 0.53 (0.42 to 0.75)  |
|             | Summer | 0.09 (-0.01 to 0.31)           | 16.6 (-1.7 to 60.0)    | 0.39 (0.30 to 0.62)              | 49.8 (40.1 to 72.1)    | 0.58 (0.53 to 0.67)  |
|             | Fall   | 0.18 (-0.04 to 0.51)           | 34.2 (-6.2 to 96.9)    | 0.46 (0.34 to 0.75)              | 54.9 (45.8 to 99.7)    | 0.72 (0.44 to 0.76)  |
|             | All    | 0.22 (0.03 to 0.49)            | 45.3 ( 6.4 to 101.4)   | 0.46 (0.40 to 0.79)              | 65.9 (51.9 to 107.8)   | 0.56 (0.45 to 0.66)  |
| South       | Winter | 0.25 (0.13 to 0.52)            | 41.9 (24.4 to 83.2)    | 0.77 (0.47 to 1.38)              | 77.9 (57.9 to 137.5)   | 0.39 (0.10 to 0.67)  |
|             | Spring | 0.21 (0.11 to 0.34)            | 49.2 (27.1 to 68.9)    | 0.46 (0.32 to 1.02)              | 69.2 (48.8 to 109.5)   | 0.53 (0.17 to 0.65)  |
|             | Summer | 0.28 (0.12 to 0.50)            | 66.3 (29.4 to 106.6)   | 0.59 (0.27 to 1.08)              | 90.9 (52.7 to 136.7)   | 0.43 (0.28 to 0.56)  |
|             | Fall   | 0.22 (0.16 to 0.52)            | 40.5 (27.4 to 79.1)    | 0.66 (0.33 to 1.66)              | 69.4 (49.3 to 123.0)   | 0.60 (0.12 to 0.64)  |
|             | All    | 0.27 (0.15 to 0.46)            | 45.6 (29.8 to 82.0)    | 0.64 (0.35 to 1.31)              | 76.6 (54.1 to 126.0)   | 0.45 (0.16 to 0.65)  |
| SW          | Winter | 0.30 (-0.41 to 0.74)           | 31.8 (-32.0 to 70.4)   | 1.03 (0.69 to 1.34)              | 65.8 (50.2 to 84.5)    | 0.49 (0.17 to 0.64)  |
|             | Spring | 0.29 (-0.08 to 0.63)           | 73.2 (-12.5 to 179.4)  | 0.58 (0.42 to 1.03)              | 89.7 (52.7 to 180.7)   | 0.56 (0.02 to 0.72)  |
|             | Summer | 0.25 (-0.06 to 0.48)           | 64.6 (-9.6 to 104.7)   | 0.45 (0.42 to 0.74)              | 80.2 (56.8 to 120.4)   | 0.36 (0.30 to 0.69)  |
|             | Fall   | 0.25 (-0.53 to 0.68)           | 37.1 (-41.8 to 93.3)   | 0.71 (0.46 to 1.26)              | 61.3 (53.9 to 100.8)   | 0.57 (0.14 to 0.66)  |
|             | All    | 0.28 (-0.28 to 0.63)           | 52.8 (-29.0 to 98.0)   | 0.82 (0.52 to 0.97)              | 71.4 (57.6 to 108.2)   | 0.58 (0.23 to 0.70)  |
| NRP         | Winter | 0.02 (-0.36 to 0.18)           | 4.2 (-48.5 to 59.4)    | 0.74 (0.56 to 1.15)              | 108.6 (59.9 to 124.4)  | 0.01 (-0.14 to 0.21) |
|             | Spring | 0.06 (-0.15 to 0.11)           | 21.8 (-34.5 to 47.0)   | 0.32 (0.28 to 0.49)              | 80.4 (51.9 to 89.7)    | 0.45 (0.05 to 0.73)  |
|             | Summer | 0.04 (-0.02 to 0.25)           | 11.8 (-6.1 to 61.2)    | 0.35 (0.25 to 1.43)              | 69.8 (44.7 to 85.9)    | 0.62 (0.29 to 0.92)  |
|             | Fall   | -0.01 (-0.28 to 0.24)          | -2.7 (-33.4 to 58.8)   | 0.49 (0.38 to 0.91)              | 74.2 (59.7 to 101.3)   | 0.24 (-0.02 to 0.45) |
|             | All    | 0.02 (-0.12 to 0.16)           | 5.3 (-19.1 to 49.2)    | 0.53 (0.42 to 0.95)              | 82.5 (62.9 to 94.2)    | 0.22 (0.03 to 0.65)  |
| NW          | Winter | 0.76 (0.16 to 1.24)            | 74.0 (17.0 to 123.9)   | 1.45 (0.95 to 2.19)              | 102.4 (69.0 to 137.4)  | 0.51 (0.39 to 0.58)  |
|             | Spring | 0.77 (0.28 to 1.28)            | 165.3 (57.1 to 360.8)  | 1.50 (0.82 to 2.14)              | 184.7 (104.7 to 361.3) | 0.46 (0.35 to 0.57)  |
|             | Summer | 1.02 (0.57 to 1.71)            | 280.1 (131.0 to 433.7) | 2.15 (0.79 to 3.33)              | 290.2 (143.2 to 435.2) | 0.44 (0.30 to 0.55)  |
|             | Fall   | 0.93 (0.47 to 1.58)            | 104.9 (49.7 to 171.8)  | 1.85 (1.24 to 2.55)              | 125.5 (95.6 to 179.5)  | 0.34 (0.26 to 0.51)  |
|             | All    | 0.78 (0.41 to 1.44)            | 124.4 (57.2 to 180.5)  | 1.69 (1.15 to 2.46)              | 150.5 (100.7 to 193.3) | 0.39 (0.28 to 0.52)  |
| West        | Winter | 0.11 (-0.27 to 0.40)           | 9.2 (-20.3 to 28.4)    | 0.88 (0.58 to 1.20)              | 47.1 (39.2 to 64.0)    | 0.50 (0.32 to 0.63)  |
|             | Spring | 0.32 (0.10 to 0.52)            | 58.2 (20.8 to 109.3)   | 0.57 (0.43 to 0.83)              | 80.7 (58.2 to 114.2)   | 0.57 (0.30 to 0.69)  |
|             | Summer | 0.32 (0.19 to 0.89)            | 66.8 (45.1 to 119.2)   | 0.52 (0.35 to 1.60)              | 79.6 (66.8 to 130.3)   | 0.65 (0.48 to 0.84)  |
|             | Fall   | 0.29 (0.02 to 0.50)            | 34.6 ( 2.5 to 53.6)    | 0.71 (0.48 to 1.25)              | 57.2 (45.2 to 68.0)    | 0.53 (0.42 to 0.79)  |
|             | All    | 0.27 (0.04 to 0.49)            | 37.5 ( 4.6 to 52.4)    | 0.66 (0.50 to 1.17)              | 64.4 (48.8 to 79.2)    | 0.56 (0.45 to 0.72)  |
| All         | Winter | 0.27 (0.18 to 0.65)            | 43.0 (25.3 to 87.0)    | 0.80 (0.66 to 1.13)              | 72.0 (68.0 to 104.6)   | 0.48 (0.46 to 0.59)  |
|             | Spring | 0.20 (0.10 to 0.43)            | 38.8 (15.2 to 89.1)    | 0.59 (0.47 to 0.79)              | 68.3 (60.1 to 104.5)   | 0.48 (0.41 to 0.61)  |
|             | Summer | 0.19 (0.10 to 0.41)            | 35.9 (18.9 to 71.7)    | 0.71 (0.51 to 0.94)              | 65.6 (55.2 to 90.2)    | 0.43 (0.32 to 0.51)  |
|             | Fall   | 0.23 (0.03 to 0.53)            | 34.1 ( 3.6 to 78.3)    | 0.69 (0.63 to 1.08)              | 62.5 (54.8 to 90.6)    | 0.56 (0.28 to 0.61)  |
|             | All    | 0.22 (0.12 to 0.50)            | 33.6 (16.4 to 78.9)    | 0.68 (0.61 to 0.96)              | 65.6 (61.2 to 95.0)    | 0.51 (0.40 to 0.54)  |

Table S9. Median (range) of performance statistics for PM<sub>2.5</sub> EC at IMPROVE sites for years 2007-2015.

| Region      | Season | MB<br>( $\mu\text{g m}^{-3}$ ) | NMB<br>(%)            | RMSE<br>( $\mu\text{g m}^{-3}$ ) | NME<br>(%)             | r                   |
|-------------|--------|--------------------------------|-----------------------|----------------------------------|------------------------|---------------------|
| NE          | Winter | 0.12 (0.09 to 0.22)            | 48.5 (26.2 to 117.8)  | 0.37 (0.26 to 0.50)              | 69.3 (51.1 to 125.3)   | 0.78 (0.63 to 0.85) |
|             | Spring | 0.09 (-0.00 to 0.11)           | 44.5 (-0.3 to 71.4)   | 0.21 (0.16 to 0.40)              | 68.6 (49.8 to 84.5)    | 0.76 (0.53 to 0.88) |
|             | Summer | 0.00 (-0.08 to 0.09)           | 1.0 (-22.0 to 44.8)   | 0.18 (0.13 to 0.36)              | 45.9 (37.9 to 66.4)    | 0.76 (0.65 to 0.87) |
|             | Fall   | 0.09 (0.01 to 0.12)            | 40.1 ( 4.1 to 57.6)   | 0.21 (0.13 to 0.44)              | 63.3 (40.3 to 73.4)    | 0.83 (0.65 to 0.86) |
|             | All    | 0.07 (0.02 to 0.12)            | 36.9 ( 5.6 to 60.1)   | 0.24 (0.20 to 0.42)              | 61.6 (51.7 to 75.8)    | 0.77 (0.64 to 0.83) |
| SE          | Winter | 0.17 (0.04 to 0.31)            | 48.1 ( 6.9 to 75.3)   | 0.46 (0.39 to 0.70)              | 73.0 (50.6 to 89.1)    | 0.65 (0.63 to 0.74) |
|             | Spring | 0.06 (-0.22 to 0.19)           | 15.1 (-32.0 to 58.5)  | 0.49 (0.24 to 0.73)              | 54.8 (44.2 to 79.4)    | 0.61 (0.48 to 0.84) |
|             | Summer | 0.01 (-0.17 to 0.17)           | 4.6 (-34.4 to 64.1)   | 0.32 (0.19 to 0.52)              | 49.8 (41.2 to 88.0)    | 0.79 (0.72 to 0.82) |
|             | Fall   | 0.10 (-0.03 to 0.25)           | 32.0 (-5.5 to 67.3)   | 0.35 (0.21 to 0.56)              | 54.3 (38.2 to 78.9)    | 0.77 (0.75 to 0.87) |
|             | All    | 0.09 (-0.10 to 0.17)           | 31.5 (-17.9 to 52.2)  | 0.40 (0.30 to 0.54)              | 60.1 (48.2 to 75.0)    | 0.69 (0.64 to 0.75) |
| Ohio Valley | Winter | 0.13 (-0.03 to 0.22)           | 50.6 (-7.3 to 68.1)   | 0.25 (0.16 to 0.34)              | 64.4 (35.8 to 76.4)    | 0.62 (0.43 to 0.69) |
|             | Spring | 0.04 (-0.13 to 0.12)           | 19.0 (-26.9 to 53.6)  | 0.21 (0.15 to 1.28)              | 46.8 (32.7 to 83.4)    | 0.56 (0.12 to 0.66) |
|             | Summer | -0.06 (-0.16 to 0.04)          | -18.3 (-37.2 to 15.4) | 0.15 (0.13 to 0.30)              | 37.2 (32.0 to 50.3)    | 0.55 (0.29 to 0.75) |
|             | Fall   | 0.08 (-0.02 to 0.19)           | 29.0 (-5.2 to 64.2)   | 0.23 (0.17 to 0.31)              | 50.2 (35.5 to 73.6)    | 0.68 (0.48 to 0.75) |
|             | All    | 0.05 (-0.08 to 0.10)           | 16.8 (-20.2 to 37.6)  | 0.25 (0.18 to 0.68)              | 50.1 (38.0 to 63.1)    | 0.54 (0.20 to 0.64) |
| MW          | Winter | 0.13 (0.02 to 0.16)            | 78.1 ( 9.0 to 101.4)  | 0.19 (0.11 to 0.27)              | 84.7 (36.5 to 113.0)   | 0.77 (0.52 to 0.85) |
|             | Spring | 0.04 (-0.10 to 0.08)           | 18.1 (-34.8 to 50.8)  | 0.21 (0.09 to 0.63)              | 59.9 (36.5 to 70.8)    | 0.68 (0.27 to 0.76) |
|             | Summer | -0.04 (-0.10 to 0.07)          | -24.0 (-30.8 to 26.7) | 0.14 (0.10 to 0.27)              | 41.3 (38.0 to 52.1)    | 0.66 (0.52 to 0.81) |
|             | Fall   | 0.04 (-0.02 to 0.23)           | 21.3 (-10.5 to 94.1)  | 0.16 (0.11 to 1.22)              | 45.3 (34.1 to 108.6)   | 0.74 (0.71 to 0.84) |
|             | All    | 0.04 (-0.05 to 0.12)           | 19.1 (-18.8 to 63.4)  | 0.21 (0.13 to 0.63)              | 57.9 (39.3 to 84.2)    | 0.64 (0.46 to 0.73) |
| South       | Winter | 0.08 (0.02 to 0.36)            | 49.7 ( 9.1 to 241.2)  | 0.30 (0.12 to 3.54)              | 77.4 (38.3 to 257.2)   | 0.55 (0.41 to 0.75) |
|             | Spring | -0.01 (-0.07 to 0.03)          | -4.1 (-32.1 to 10.3)  | 0.18 (0.12 to 0.81)              | 46.5 (40.6 to 63.8)    | 0.68 (0.18 to 0.82) |
|             | Summer | -0.02 (-0.03 to 0.03)          | -11.1 (-15.8 to 18.5) | 0.11 (0.09 to 0.18)              | 45.2 (38.4 to 50.5)    | 0.60 (0.44 to 0.75) |
|             | Fall   | 0.06 (-0.01 to 0.10)           | 27.2 (-6.3 to 47.5)   | 0.21 (0.13 to 0.48)              | 52.0 (36.7 to 65.4)    | 0.69 (0.21 to 0.82) |
|             | All    | 0.02 (-0.01 to 0.10)           | 11.2 (-6.7 to 68.0)   | 0.19 (0.16 to 1.68)              | 52.7 (41.1 to 97.4)    | 0.53 (0.26 to 0.74) |
| SW          | Winter | 0.02 (-0.07 to 0.08)           | 14.9 (-32.5 to 49.7)  | 0.28 (0.17 to 0.39)              | 58.7 (50.0 to 81.5)    | 0.81 (0.78 to 0.87) |
|             | Spring | 0.04 (-0.03 to 0.07)           | 52.6 (-23.2 to 77.7)  | 0.24 (0.10 to 0.33)              | 83.3 (61.7 to 109.8)   | 0.73 (0.43 to 0.80) |
|             | Summer | 0.02 (-0.04 to 0.08)           | 20.2 (-30.0 to 65.4)  | 0.21 (0.14 to 0.53)              | 82.5 (58.4 to 111.3)   | 0.48 (0.16 to 0.78) |
|             | Fall   | 0.04 (-0.03 to 0.10)           | 29.4 (-15.7 to 62.5)  | 0.37 (0.21 to 0.45)              | 79.6 (63.5 to 90.3)    | 0.68 (0.36 to 0.76) |
|             | All    | 0.03 (-0.04 to 0.07)           | 29.1 (-25.5 to 52.0)  | 0.26 (0.18 to 0.38)              | 71.1 (60.8 to 93.2)    | 0.66 (0.53 to 0.78) |
| NRP         | Winter | 0.01 (0.00 to 0.05)            | 14.1 ( 0.6 to 92.3)   | 0.09 (0.08 to 0.19)              | 67.2 (54.1 to 131.1)   | 0.42 (0.20 to 0.54) |
|             | Spring | -0.00 (-0.04 to 0.06)          | -2.7 (-35.9 to 96.1)  | 0.07 (0.06 to 0.46)              | 48.4 (42.8 to 124.2)   | 0.57 (0.09 to 0.96) |
|             | Summer | 0.04 (-0.03 to 0.35)           | 32.5 (-21.0 to 133.1) | 0.26 (0.16 to 2.88)              | 69.2 (52.6 to 161.8)   | 0.45 (0.17 to 0.72) |
|             | Fall   | 0.06 (-0.04 to 0.15)           | 48.2 (-24.9 to 124.4) | 0.42 (0.14 to 1.13)              | 82.0 (55.5 to 156.1)   | 0.52 (0.08 to 0.72) |
|             | All    | 0.02 (-0.01 to 0.15)           | 17.4 (-14.1 to 120.0) | 0.24 (0.14 to 1.51)              | 75.8 (53.7 to 151.2)   | 0.54 (0.08 to 0.74) |
| NW          | Winter | 0.12 (0.08 to 0.20)            | 93.8 (46.7 to 231.5)  | 0.59 (0.41 to 0.84)              | 156.2 (96.1 to 252.8)  | 0.77 (0.60 to 0.84) |
|             | Spring | 0.20 (0.08 to 0.26)            | 260.0 (64.6 to 294.8) | 0.80 (0.42 to 1.06)              | 291.8 (114.0 to 328.5) | 0.72 (0.48 to 0.77) |
|             | Summer | 0.36 (0.05 to 0.66)            | 205.4 (40.1 to 388.8) | 1.34 (0.29 to 2.57)              | 234.4 (89.5 to 410.7)  | 0.61 (0.31 to 0.77) |
|             | Fall   | 0.35 (0.11 to 0.57)            | 171.4 (70.7 to 416.3) | 1.14 (0.51 to 4.93)              | 194.7 (110.1 to 442.1) | 0.60 (0.18 to 0.78) |
|             | All    | 0.24 (0.09 to 0.43)            | 189.8 (68.4 to 309.2) | 1.01 (0.50 to 2.87)              | 222.8 (117.0 to 327.2) | 0.58 (0.37 to 0.75) |
| West        | Winter | 0.02 (-0.00 to 0.12)           | 16.9 (-1.9 to 54.1)   | 0.20 (0.16 to 0.54)              | 61.8 (50.6 to 86.8)    | 0.82 (0.73 to 0.91) |
|             | Spring | 0.03 (0.01 to 0.06)            | 32.4 ( 6.3 to 49.0)   | 0.13 (0.11 to 0.25)              | 68.6 (62.9 to 78.0)    | 0.71 (0.44 to 0.73) |
|             | Summer | 0.06 (0.01 to 0.42)            | 37.2 ( 3.7 to 137.3)  | 0.38 (0.13 to 1.08)              | 74.1 (50.1 to 161.3)   | 0.63 (0.39 to 0.82) |
|             | Fall   | 0.12 (0.03 to 0.20)            | 62.8 (14.3 to 98.3)   | 0.57 (0.36 to 0.87)              | 97.7 (71.0 to 129.3)   | 0.51 (0.41 to 0.62) |
|             | All    | 0.06 (0.02 to 0.18)            | 39.7 (10.7 to 90.4)   | 0.43 (0.22 to 0.66)              | 81.9 (62.3 to 120.9)   | 0.62 (0.50 to 0.71) |
| All         | Winter | 0.07 (0.03 to 0.13)            | 40.0 (13.1 to 78.0)   | 0.36 (0.29 to 0.93)              | 69.1 (58.2 to 102.0)   | 0.71 (0.37 to 0.76) |
|             | Spring | 0.06 (-0.03 to 0.09)           | 41.8 (-12.0 to 72.5)  | 0.38 (0.26 to 0.54)              | 75.4 (57.5 to 97.5)    | 0.56 (0.40 to 0.67) |
|             | Summer | 0.06 (-0.01 to 0.17)           | 34.3 (-4.2 to 88.9)   | 0.60 (0.18 to 1.42)              | 82.3 (51.3 to 116.6)   | 0.48 (0.35 to 0.66) |
|             | Fall   | 0.11 (0.03 to 0.16)            | 57.2 (13.9 to 91.9)   | 0.57 (0.29 to 1.69)              | 87.5 (55.6 to 118.9)   | 0.59 (0.18 to 0.65) |
|             | All    | 0.07 (0.02 to 0.13)            | 44.5 ( 7.9 to 84.0)   | 0.46 (0.31 to 1.23)              | 79.1 (59.2 to 110.2)   | 0.55 (0.33 to 0.66) |

Table S10. Model performance statistics for PM<sub>2.5</sub> at AQS (FRM/FEM) sites for the 2015 base case.

| Region              | Season | N     | Avg. Obs. (µg m <sup>-3</sup> ) | Avg. Mod. (µg m <sup>-3</sup> ) | MB (µg m <sup>-3</sup> ) | NMB (%) | RMSE (µg m <sup>-3</sup> ) | NME (%) | r    |
|---------------------|--------|-------|---------------------------------|---------------------------------|--------------------------|---------|----------------------------|---------|------|
| Northeast           | Winter | 13001 | 10.04                           | 12.74                           | 2.71                     | 27.0    | 7.33                       | 48.0    | 0.68 |
|                     | Spring | 13538 | 7.97                            | 8.83                            | 0.86                     | 10.8    | 5.19                       | 44.0    | 0.59 |
|                     | Summer | 13660 | 8.38                            | 8.02                            | -0.36                    | -4.3    | 4.06                       | 35.2    | 0.67 |
|                     | Fall   | 13270 | 7.18                            | 9.08                            | 1.90                     | 26.5    | 5.40                       | 50.0    | 0.73 |
|                     | Annual | 53469 | 8.38                            | 9.64                            | 1.26                     | 15.0    | 5.60                       | 44.2    | 0.67 |
| Southeast           | Winter | 11190 | 8.07                            | 10.28                           | 2.21                     | 27.4    | 5.65                       | 47.4    | 0.58 |
|                     | Spring | 11961 | 8.06                            | 8.25                            | 0.18                     | 2.3     | 4.08                       | 33.6    | 0.55 |
|                     | Summer | 11641 | 9.78                            | 8.45                            | -1.33                    | -13.6   | 4.86                       | 35.3    | 0.47 |
|                     | Fall   | 11365 | 6.93                            | 8.13                            | 1.20                     | 17.3    | 4.32                       | 41.7    | 0.70 |
|                     | Annual | 46157 | 8.22                            | 8.76                            | 0.54                     | 6.6     | 4.75                       | 39.1    | 0.55 |
| Ohio Valley         | Winter | 10323 | 9.49                            | 11.60                           | 2.10                     | 22.1    | 5.75                       | 43.2    | 0.63 |
|                     | Spring | 10867 | 8.90                            | 9.85                            | 0.95                     | 10.6    | 4.60                       | 36.3    | 0.65 |
|                     | Summer | 10714 | 10.95                           | 10.56                           | -0.39                    | -3.6    | 5.55                       | 34.3    | 0.55 |
|                     | Fall   | 10568 | 8.41                            | 10.96                           | 2.54                     | 30.2    | 6.23                       | 47.1    | 0.65 |
|                     | Annual | 42472 | 9.44                            | 10.73                           | 1.29                     | 13.6    | 5.56                       | 39.8    | 0.59 |
| Upper Midwest       | Winter | 6478  | 8.79                            | 9.72                            | 0.92                     | 10.5    | 4.75                       | 38.2    | 0.70 |
|                     | Spring | 6643  | 7.32                            | 8.27                            | 0.96                     | 13.1    | 4.30                       | 41.9    | 0.67 |
|                     | Summer | 6718  | 7.88                            | 7.85                            | -0.03                    | -0.4    | 5.26                       | 40.8    | 0.56 |
|                     | Fall   | 6664  | 6.81                            | 9.14                            | 2.33                     | 34.2    | 4.92                       | 49.3    | 0.75 |
|                     | Annual | 26503 | 7.69                            | 8.74                            | 1.04                     | 13.6    | 4.82                       | 42.2    | 0.64 |
| South               | Winter | 8041  | 7.53                            | 10.13                           | 2.60                     | 34.5    | 11.81                      | 56.6    | 0.36 |
|                     | Spring | 8369  | 8.08                            | 7.12                            | -0.96                    | -11.9   | 4.24                       | 36.3    | 0.51 |
|                     | Summer | 8440  | 10.80                           | 8.31                            | -2.49                    | -23.0   | 6.04                       | 40.3    | 0.34 |
|                     | Fall   | 8340  | 7.55                            | 7.99                            | 0.44                     | 5.9     | 3.76                       | 35.5    | 0.63 |
|                     | Annual | 33190 | 8.50                            | 8.37                            | -0.13                    | -1.6    | 7.15                       | 41.8    | 0.34 |
| Southwest           | Winter | 4911  | 7.46                            | 7.90                            | 0.45                     | 6.0     | 6.50                       | 55.9    | 0.52 |
|                     | Spring | 4998  | 4.88                            | 5.88                            | 1.00                     | 20.6    | 3.60                       | 48.4    | 0.44 |
|                     | Summer | 5069  | 6.12                            | 4.85                            | -1.27                    | -20.8   | 4.15                       | 43.1    | 0.59 |
|                     | Fall   | 5091  | 5.31                            | 5.90                            | 0.59                     | 11.1    | 4.35                       | 52.2    | 0.49 |
|                     | Annual | 20069 | 5.93                            | 6.12                            | 0.19                     | 3.2     | 4.77                       | 50.2    | 0.52 |
| N. Rockies & Plains | Winter | 4987  | 5.57                            | 3.60                            | -1.98                    | -35.5   | 6.80                       | 63.4    | 0.23 |
|                     | Spring | 5380  | 4.57                            | 5.00                            | 0.44                     | 9.6     | 29.58                      | 61.6    | 0.20 |
|                     | Summer | 5260  | 9.98                            | 7.68                            | -2.30                    | -23.1   | 17.61                      | 57.4    | 0.57 |
|                     | Fall   | 5010  | 5.57                            | 5.42                            | -0.15                    | -2.7    | 5.65                       | 56.4    | 0.44 |
|                     | Annual | 20637 | 6.43                            | 5.45                            | -0.99                    | -15.3   | 18.06                      | 59.2    | 0.34 |
| Northwest           | Winter | 8994  | 7.90                            | 7.82                            | -0.08                    | -1.0    | 10.20                      | 80.9    | 0.25 |
|                     | Spring | 9306  | 5.02                            | 6.84                            | 1.82                     | 36.2    | 6.65                       | 71.5    | 0.48 |
|                     | Summer | 9993  | 9.17                            | 11.12                           | 1.95                     | 21.2    | 32.40                      | 67.7    | 0.46 |
|                     | Fall   | 9868  | 7.03                            | 9.39                            | 2.37                     | 33.7    | 15.33                      | 78.3    | 0.31 |
|                     | Annual | 38161 | 7.31                            | 8.85                            | 1.55                     | 21.2    | 19.26                      | 74.3    | 0.43 |
| West                | Winter | 10462 | 11.67                           | 9.58                            | -2.08                    | -17.8   | 8.09                       | 43.3    | 0.68 |
|                     | Spring | 10989 | 7.52                            | 6.95                            | -0.57                    | -7.6    | 4.17                       | 38.3    | 0.55 |
|                     | Summer | 11065 | 8.95                            | 8.53                            | -0.43                    | -4.8    | 6.36                       | 43.5    | 0.51 |
|                     | Fall   | 10587 | 8.61                            | 9.11                            | 0.50                     | 5.8     | 16.85                      | 46.9    | 0.37 |
|                     | Annual | 43103 | 9.16                            | 8.52                            | -0.64                    | -7.0    | 10.02                      | 43.1    | 0.44 |

Table S11. Definition of statistics used in the CMAQ model performance evaluation.

| Statistic                                                                                                                             | Description                                                                                                                                                          |
|---------------------------------------------------------------------------------------------------------------------------------------|----------------------------------------------------------------------------------------------------------------------------------------------------------------------|
| $MB (\mu\text{g m}^{-3}) = \frac{1}{n} \sum_{i=1}^n (P_i - O_i)$                                                                      | Mean bias (MB) is defined as the average difference between predicted (P) and observed (O) concentrations for the total number of samples (n)                        |
| $RMSE (\mu\text{g m}^{-3}) = \sqrt{\sum_{i=1}^n (P_i - O_i)^2 / n}$                                                                   | Root mean-squared error (RMSE)                                                                                                                                       |
| $NMB (\%) = \frac{\sum_{i=1}^n (P_i - O_i)}{\sum_{i=1}^n O_i} \times 100$                                                             | The normalized mean bias (NMB) is defined as the sum of the difference between predictions and observations divided by the sum of observed values                    |
| $NME (\%) = \frac{\sum_{i=1}^n  P_i - O_i }{\sum_{i=1}^n O_i} \times 100$                                                             | Normalized mean error (NME) is defined as the sum of the absolute value of the difference between predictions and observations divided by the sum of observed values |
| $r = \frac{\sum_{i=1}^n (P_i - \bar{P})(O_i - \bar{O})}{\sqrt{\sum_{i=1}^n (P_i - \bar{P})^2} \sqrt{\sum_{i=1}^n (O_i - \bar{O})^2}}$ | Pearson correlation coefficient                                                                                                                                      |

Table S12. Performance statistics for PM<sub>2.5</sub> sulfate at CSN and IMPROVE sites for the 2015 base case.

| Region        | Network | Season | N    | Avg. Obs. ( $\mu\text{g m}^{-3}$ ) | Avg. Mod. ( $\mu\text{g m}^{-3}$ ) | MB ( $\mu\text{g m}^{-3}$ ) | NMB (%) | RMSE ( $\mu\text{g m}^{-3}$ ) | NME (%) | <i>r</i> |
|---------------|---------|--------|------|------------------------------------|------------------------------------|-----------------------------|---------|-------------------------------|---------|----------|
| Northeast     | CSN     | Winter | 694  | 1.56                               | 1.56                               | 0.00                        | 0.3     | 1.45                          | 52.7    | 0.18     |
|               |         | Spring | 764  | 1.54                               | 1.48                               | -0.06                       | -4.0    | 0.76                          | 30.2    | 0.64     |
|               |         | Summer | 706  | 1.56                               | 1.60                               | 0.04                        | 2.8     | 0.56                          | 24.8    | 0.86     |
|               |         | Fall   | 703  | 1.11                               | 1.23                               | 0.12                        | 10.8    | 0.63                          | 32.9    | 0.84     |
|               |         | All    | 2867 | 1.45                               | 1.47                               | 0.02                        | 1.7     | 0.91                          | 35.1    | 0.61     |
|               | IMPROVE | Winter | 384  | 1.07                               | 0.85                               | -0.22                       | -20.2   | 0.52                          | 34.6    | 0.69     |
|               |         | Spring | 443  | 0.99                               | 1.01                               | 0.02                        | 2.1     | 0.39                          | 28.2    | 0.72     |
|               |         | Summer | 464  | 0.97                               | 1.05                               | 0.08                        | 8.2     | 0.42                          | 30.2    | 0.87     |
|               |         | Fall   | 440  | 0.73                               | 0.80                               | 0.07                        | 9.1     | 0.32                          | 31.1    | 0.90     |
|               |         | All    | 1731 | 0.94                               | 0.93                               | -0.00                       | -0.4    | 0.42                          | 31.0    | 0.81     |
| Southeast     | CSN     | Winter | 446  | 1.23                               | 1.31                               | 0.08                        | 6.1     | 0.74                          | 44.6    | 0.47     |
|               |         | Spring | 490  | 1.48                               | 1.47                               | -0.01                       | -0.4    | 0.69                          | 31.4    | 0.54     |
|               |         | Summer | 478  | 1.47                               | 1.47                               | 0.00                        | 0.0     | 0.52                          | 26.8    | 0.63     |
|               |         | Fall   | 470  | 0.90                               | 1.12                               | 0.22                        | 24.9    | 0.56                          | 43.7    | 0.72     |
|               |         | All    | 1884 | 1.27                               | 1.34                               | 0.07                        | 5.7     | 0.64                          | 35.3    | 0.61     |
|               | IMPROVE | Winter | 358  | 1.24                               | 1.11                               | -0.13                       | -10.7   | 0.63                          | 36.0    | 0.62     |
|               |         | Spring | 413  | 1.54                               | 1.40                               | -0.14                       | -9.2    | 0.62                          | 28.7    | 0.64     |
|               |         | Summer | 391  | 1.55                               | 1.30                               | -0.24                       | -15.8   | 0.55                          | 28.9    | 0.72     |
|               |         | Fall   | 378  | 0.89                               | 0.99                               | 0.10                        | 11.2    | 0.45                          | 35.6    | 0.77     |
|               |         | All    | 1540 | 1.31                               | 1.21                               | -0.11                       | -8.1    | 0.57                          | 31.5    | 0.70     |
| Ohio Valley   | CSN     | Winter | 535  | 1.77                               | 1.28                               | -0.49                       | -27.6   | 1.24                          | 42.0    | 0.43     |
|               |         | Spring | 601  | 1.80                               | 1.75                               | -0.05                       | -2.7    | 0.87                          | 31.3    | 0.66     |
|               |         | Summer | 542  | 2.35                               | 2.33                               | -0.02                       | -0.8    | 1.38                          | 29.5    | 0.68     |
|               |         | Fall   | 520  | 1.31                               | 1.41                               | 0.11                        | 8.2     | 0.59                          | 28.3    | 0.83     |
|               |         | All    | 2198 | 1.81                               | 1.70                               | -0.11                       | -6.2    | 1.07                          | 32.8    | 0.66     |
|               | IMPROVE | Winter | 215  | 1.32                               | 0.99                               | -0.33                       | -25.3   | 0.66                          | 35.3    | 0.73     |
|               |         | Spring | 245  | 1.48                               | 1.34                               | -0.14                       | -9.3    | 0.68                          | 32.6    | 0.59     |
|               |         | Summer | 245  | 1.89                               | 1.73                               | -0.17                       | -8.7    | 0.78                          | 29.2    | 0.77     |
|               |         | Fall   | 233  | 1.08                               | 1.16                               | 0.08                        | 7.2     | 0.45                          | 31.0    | 0.87     |
|               |         | All    | 938  | 1.45                               | 1.32                               | -0.14                       | -9.4    | 0.66                          | 31.7    | 0.76     |
| Upper Midwest | CSN     | Winter | 270  | 1.43                               | 1.12                               | -0.31                       | -21.6   | 0.76                          | 38.6    | 0.65     |
|               |         | Spring | 291  | 1.36                               | 1.41                               | 0.05                        | 3.5     | 0.55                          | 29.0    | 0.84     |
|               |         | Summer | 285  | 1.59                               | 1.67                               | 0.08                        | 4.8     | 0.70                          | 26.9    | 0.84     |
|               |         | Fall   | 275  | 1.08                               | 1.23                               | 0.15                        | 14.3    | 0.62                          | 34.3    | 0.81     |
|               |         | All    | 1121 | 1.37                               | 1.36                               | -0.00                       | -0.4    | 0.66                          | 31.8    | 0.79     |
|               | IMPROVE | Winter | 216  | 0.96                               | 0.70                               | -0.27                       | -27.6   | 0.50                          | 36.9    | 0.67     |
|               |         | Spring | 244  | 0.83                               | 0.90                               | 0.07                        | 8.0     | 0.37                          | 33.3    | 0.80     |
|               |         | Summer | 242  | 0.96                               | 1.07                               | 0.11                        | 11.7    | 0.41                          | 31.5    | 0.87     |
|               |         | Fall   | 238  | 0.73                               | 0.84                               | 0.11                        | 15.7    | 0.32                          | 33.6    | 0.89     |
|               |         | All    | 940  | 0.87                               | 0.88                               | 0.01                        | 1.6     | 0.40                          | 33.8    | 0.80     |
| South         | CSN     | Winter | 258  | 1.28                               | 1.13                               | -0.15                       | -11.8   | 0.73                          | 37.7    | 0.64     |
|               |         | Spring | 291  | 1.47                               | 1.42                               | -0.05                       | -3.2    | 0.72                          | 34.9    | 0.55     |
|               |         | Summer | 288  | 1.90                               | 1.49                               | -0.41                       | -21.6   | 0.80                          | 32.9    | 0.61     |
|               |         | Fall   | 274  | 1.29                               | 1.38                               | 0.10                        | 7.7     | 0.65                          | 33.0    | 0.63     |
|               |         | All    | 1111 | 1.49                               | 1.36                               | -0.13                       | -8.7    | 0.73                          | 34.4    | 0.60     |
|               | IMPROVE | Winter | 226  | 0.85                               | 0.79                               | -0.06                       | -6.8    | 0.46                          | 37.4    | 0.73     |
|               |         | Spring | 271  | 1.16                               | 1.06                               | -0.10                       | -8.9    | 0.60                          | 37.4    | 0.60     |
|               |         | Summer | 273  | 1.77                               | 1.20                               | -0.56                       | -31.8   | 0.87                          | 39.3    | 0.58     |
|               |         | Fall   | 245  | 1.12                               | 1.02                               | -0.10                       | -8.9    | 0.60                          | 36.2    | 0.65     |
|               |         | All    | 1015 | 1.24                               | 1.03                               | -0.22                       | -17.3   | 0.66                          | 37.9    | 0.65     |
| Southwest     | CSN     | Winter | 183  | 0.49                               | 0.62                               | 0.13                        | 26.5    | 0.34                          | 53.5    | 0.44     |
|               |         | Spring | 202  | 0.61                               | 0.96                               | 0.35                        | 57.1    | 0.47                          | 65.3    | 0.44     |

| Region              | Network | Season | N     | Avg. Obs.<br>( $\mu\text{g m}^{-3}$ ) | Avg. Mod.<br>( $\mu\text{g m}^{-3}$ ) | MB<br>( $\mu\text{g m}^{-3}$ ) | NMB<br>(%) | RMSE<br>( $\mu\text{g m}^{-3}$ ) | NME<br>(%) | r    |
|---------------------|---------|--------|-------|---------------------------------------|---------------------------------------|--------------------------------|------------|----------------------------------|------------|------|
|                     |         | Summer | 191   | 0.85                                  | 0.71                                  | -0.14                          | -16.1      | 0.47                             | 40.6       | 0.18 |
|                     |         | Fall   | 184   | 0.58                                  | 0.68                                  | 0.10                           | 17.2       | 0.43                             | 52.7       | 0.41 |
|                     |         | All    | 760   | 0.63                                  | 0.75                                  | 0.11                           | 17.9       | 0.43                             | 52.0       | 0.31 |
|                     | IMPROVE | Winter | 840   | 0.30                                  | 0.43                                  | 0.13                           | 45.5       | 0.24                             | 65.4       | 0.57 |
|                     |         | Spring | 959   | 0.50                                  | 0.87                                  | 0.37                           | 73.9       | 0.48                             | 83.4       | 0.51 |
|                     |         | Summer | 956   | 0.77                                  | 0.58                                  | -0.19                          | -24.3      | 0.46                             | 38.9       | 0.47 |
|                     |         | Fall   | 916   | 0.48                                  | 0.53                                  | 0.05                           | 10.6       | 0.31                             | 49.4       | 0.63 |
| All                 | 3671    | 0.52   | 0.61  | 0.09                                  | 17.6                                  | 0.39                           | 56.0       | 0.46                             |            |      |
| N. Rockies & Plains | CSN     | Winter | 140   | 0.72                                  | 0.51                                  | -0.20                          | -28.3      | 0.48                             | 45.3       | 0.67 |
|                     |         | Spring | 149   | 0.77                                  | 0.86                                  | 0.09                           | 11.2       | 0.35                             | 35.5       | 0.68 |
|                     |         | Summer | 155   | 0.78                                  | 0.91                                  | 0.14                           | 17.6       | 0.41                             | 37.6       | 0.78 |
|                     |         | Fall   | 141   | 0.63                                  | 0.69                                  | 0.06                           | 9.2        | 0.35                             | 38.1       | 0.78 |
|                     |         | All    | 585   | 0.73                                  | 0.75                                  | 0.02                           | 3.3        | 0.40                             | 39.0       | 0.70 |
|                     | IMPROVE | Winter | 516   | 0.38                                  | 0.34                                  | -0.03                          | -8.4       | 0.35                             | 52.6       | 0.70 |
|                     |         | Spring | 589   | 0.52                                  | 0.75                                  | 0.23                           | 43.8       | 0.42                             | 61.4       | 0.60 |
|                     |         | Summer | 608   | 0.51                                  | 0.74                                  | 0.22                           | 43.8       | 0.58                             | 65.6       | 0.47 |
|                     |         | Fall   | 571   | 0.33                                  | 0.53                                  | 0.20                           | 62.4       | 0.35                             | 79.9       | 0.47 |
|                     |         | All    | 2284  | 0.44                                  | 0.60                                  | 0.16                           | 37.2       | 0.44                             | 64.4       | 0.51 |
| Northwest           | CSN     | Winter | 123   | 0.42                                  | 0.80                                  | 0.38                           | 90.8       | 0.90                             | 127.8      | 0.15 |
|                     |         | Spring | 135   | 0.54                                  | 1.07                                  | 0.53                           | 99.2       | 0.70                             | 103.8      | 0.63 |
|                     |         | Summer | 130   | 0.67                                  | 1.09                                  | 0.42                           | 62.3       | 0.69                             | 81.4       | 0.25 |
|                     |         | Fall   | 132   | 0.44                                  | 0.91                                  | 0.47                           | 108.3      | 0.73                             | 113.3      | 0.32 |
|                     |         | All    | 520   | 0.52                                  | 0.97                                  | 0.45                           | 87.6       | 0.76                             | 103.2      | 0.32 |
|                     | IMPROVE | Winter | 419   | 0.13                                  | 0.32                                  | 0.19                           | 142.5      | 0.32                             | 162.4      | 0.38 |
|                     |         | Spring | 472   | 0.40                                  | 0.82                                  | 0.42                           | 104.5      | 0.57                             | 106.9      | 0.78 |
|                     |         | Summer | 470   | 0.44                                  | 0.79                                  | 0.35                           | 79.1       | 0.56                             | 87.2       | 0.36 |
|                     |         | Fall   | 458   | 0.25                                  | 0.62                                  | 0.38                           | 152.4      | 0.84                             | 161.7      | 0.29 |
|                     |         | All    | 1819  | 0.31                                  | 0.65                                  | 0.34                           | 108.5      | 0.61                             | 116.1      | 0.53 |
| West                | CSN     | Winter | 226   | 0.68                                  | 0.81                                  | 0.13                           | 19.4       | 0.64                             | 64.7       | 0.48 |
|                     |         | Spring | 251   | 0.99                                  | 1.22                                  | 0.24                           | 24.2       | 0.59                             | 47.5       | 0.56 |
|                     |         | Summer | 252   | 1.29                                  | 1.26                                  | -0.03                          | -2.1       | 0.61                             | 32.6       | 0.63 |
|                     |         | Fall   | 233   | 0.75                                  | 0.95                                  | 0.20                           | 27.3       | 0.46                             | 47.5       | 0.59 |
|                     |         | All    | 962   | 0.94                                  | 1.07                                  | 0.14                           | 14.5       | 0.58                             | 45.1       | 0.60 |
|                     | IMPROVE | Winter | 492   | 0.30                                  | 0.49                                  | 0.20                           | 66.7       | 0.47                             | 107.1      | 0.36 |
|                     |         | Spring | 600   | 0.63                                  | 0.95                                  | 0.32                           | 50.4       | 0.54                             | 68.4       | 0.47 |
|                     |         | Summer | 579   | 0.76                                  | 0.86                                  | 0.10                           | 12.7       | 0.48                             | 46.9       | 0.23 |
|                     |         | Fall   | 539   | 0.45                                  | 0.65                                  | 0.19                           | 43.0       | 0.42                             | 72.2       | 0.37 |
|                     |         | All    | 2210  | 0.55                                  | 0.75                                  | 0.20                           | 37.1       | 0.48                             | 66.0       | 0.46 |
| All                 | CSN     | Winter | 2875  | 1.28                                  | 1.19                                  | -0.10                          | -7.5       | 1.03                             | 47.3       | 0.42 |
|                     |         | Spring | 3174  | 1.38                                  | 1.42                                  | 0.04                           | 3.1        | 0.71                             | 34.4       | 0.68 |
|                     |         | Summer | 3027  | 1.58                                  | 1.57                                  | -0.01                          | -0.7       | 0.80                             | 29.9       | 0.76 |
|                     |         | Fall   | 2932  | 1.01                                  | 1.16                                  | 0.15                           | 15.3       | 0.58                             | 36.8       | 0.80 |
|                     |         | All    | 12008 | 1.32                                  | 1.34                                  | 0.02                           | 1.8        | 0.79                             | 36.5       | 0.67 |
|                     | IMPROVE | Winter | 3666  | 0.60                                  | 0.60                                  | 0.00                           | 0.0        | 0.44                             | 48.7       | 0.74 |
|                     |         | Spring | 4236  | 0.78                                  | 0.97                                  | 0.18                           | 23.6       | 0.52                             | 50.1       | 0.66 |
|                     |         | Summer | 4228  | 0.93                                  | 0.92                                  | -0.01                          | -1.2       | 0.55                             | 40.4       | 0.70 |
|                     |         | Fall   | 4018  | 0.58                                  | 0.71                                  | 0.13                           | 22.6       | 0.46                             | 50.5       | 0.70 |
|                     |         | All    | 16148 | 0.73                                  | 0.81                                  | 0.08                           | 10.8       | 0.50                             | 46.7       | 0.70 |

Table S13. Performance statistics for PM<sub>2.5</sub> nitrate at CSN and IMPROVE sites for the 2015 base case.

| Region        | Network | Season | N    | Avg. Obs. ( $\mu\text{g m}^{-3}$ ) | Avg. Mod. ( $\mu\text{g m}^{-3}$ ) | MB ( $\mu\text{g m}^{-3}$ ) | NMB (%) | RMSE ( $\mu\text{g m}^{-3}$ ) | NME (%) | <i>r</i> |
|---------------|---------|--------|------|------------------------------------|------------------------------------|-----------------------------|---------|-------------------------------|---------|----------|
| Northeast     | CSN     | Winter | 695  | 2.17                               | 2.53                               | 0.36                        | 16.4    | 1.42                          | 41.6    | 0.70     |
|               |         | Spring | 764  | 1.53                               | 1.51                               | -0.02                       | -1.3    | 1.12                          | 47.8    | 0.77     |
|               |         | Summer | 706  | 0.43                               | 0.28                               | -0.15                       | -35.1   | 0.40                          | 59.3    | 0.61     |
|               |         | Fall   | 703  | 0.67                               | 0.93                               | 0.27                        | 40.2    | 1.00                          | 74.3    | 0.68     |
|               |         | All    | 2868 | 1.20                               | 1.31                               | 0.11                        | 9.1     | 1.05                          | 49.7    | 0.78     |
|               | IMPROVE | Winter | 384  | 0.63                               | 1.04                               | 0.42                        | 66.3    | 0.96                          | 83.8    | 0.80     |
|               |         | Spring | 443  | 0.43                               | 0.51                               | 0.08                        | 18.1    | 0.55                          | 70.7    | 0.64     |
|               |         | Summer | 464  | 0.16                               | 0.16                               | 0.00                        | 0.0     | 0.23                          | 80.0    | 0.34     |
|               |         | Fall   | 440  | 0.18                               | 0.29                               | 0.11                        | 60.1    | 0.33                          | 102.8   | 0.53     |
|               |         | All    | 1731 | 0.34                               | 0.48                               | 0.14                        | 41.5    | 0.57                          | 81.6    | 0.75     |
| Southeast     | CSN     | Winter | 446  | 0.93                               | 1.65                               | 0.71                        | 76.7    | 1.32                          | 93.7    | 0.63     |
|               |         | Spring | 493  | 0.54                               | 0.58                               | 0.04                        | 7.6     | 0.51                          | 61.3    | 0.72     |
|               |         | Summer | 478  | 0.28                               | 0.22                               | -0.06                       | -22.5   | 0.26                          | 62.7    | 0.32     |
|               |         | Fall   | 470  | 0.31                               | 0.61                               | 0.30                        | 98.4    | 0.77                          | 130.8   | 0.54     |
|               |         | All    | 1887 | 0.51                               | 0.75                               | 0.24                        | 47.0    | 0.80                          | 86.0    | 0.67     |
|               | IMPROVE | Winter | 358  | 0.62                               | 0.90                               | 0.28                        | 45.0    | 0.83                          | 80.1    | 0.67     |
|               |         | Spring | 413  | 0.41                               | 0.43                               | 0.02                        | 4.6     | 0.45                          | 67.1    | 0.68     |
|               |         | Summer | 391  | 0.20                               | 0.20                               | -0.00                       | -1.0    | 0.22                          | 63.4    | 0.42     |
|               |         | Fall   | 378  | 0.21                               | 0.32                               | 0.11                        | 52.4    | 0.37                          | 100.0   | 0.47     |
|               |         | All    | 1540 | 0.36                               | 0.45                               | 0.10                        | 26.9    | 0.51                          | 76.5    | 0.68     |
| Ohio Valley   | CSN     | Winter | 496  | 2.74                               | 2.41                               | -0.33                       | -12.1   | 1.84                          | 40.5    | 0.63     |
|               |         | Spring | 554  | 1.67                               | 1.35                               | -0.32                       | -19.4   | 1.26                          | 46.9    | 0.76     |
|               |         | Summer | 542  | 0.64                               | 0.53                               | -0.11                       | -17.4   | 0.75                          | 67.2    | 0.44     |
|               |         | Fall   | 520  | 0.66                               | 0.82                               | 0.15                        | 23.1    | 0.67                          | 65.6    | 0.63     |
|               |         | All    | 2112 | 1.41                               | 1.26                               | -0.15                       | -10.9   | 1.21                          | 48.5    | 0.74     |
|               | IMPROVE | Winter | 215  | 1.33                               | 1.29                               | -0.05                       | -3.5    | 1.02                          | 54.2    | 0.62     |
|               |         | Spring | 245  | 0.64                               | 0.66                               | 0.01                        | 2.1     | 0.85                          | 71.3    | 0.47     |
|               |         | Summer | 245  | 0.23                               | 0.20                               | -0.03                       | -13.3   | 0.19                          | 53.8    | 0.64     |
|               |         | Fall   | 233  | 0.31                               | 0.35                               | 0.04                        | 13.2    | 0.36                          | 70.7    | 0.58     |
|               |         | All    | 938  | 0.61                               | 0.60                               | -0.01                       | -0.8    | 0.69                          | 61.0    | 0.67     |
| Upper Midwest | CSN     | Winter | 270  | 2.73                               | 2.33                               | -0.39                       | -14.4   | 1.63                          | 39.0    | 0.72     |
|               |         | Spring | 291  | 2.26                               | 1.64                               | -0.62                       | -27.6   | 1.83                          | 48.0    | 0.72     |
|               |         | Summer | 285  | 0.62                               | 0.60                               | -0.02                       | -2.7    | 0.72                          | 63.9    | 0.61     |
|               |         | Fall   | 275  | 0.87                               | 0.96                               | 0.09                        | 10.8    | 0.81                          | 56.8    | 0.63     |
|               |         | All    | 1121 | 1.61                               | 1.38                               | -0.24                       | -14.7   | 1.34                          | 47.1    | 0.74     |
|               | IMPROVE | Winter | 216  | 1.45                               | 1.31                               | -0.14                       | -9.9    | 1.17                          | 44.3    | 0.79     |
|               |         | Spring | 244  | 0.91                               | 0.68                               | -0.23                       | -25.8   | 0.84                          | 50.4    | 0.77     |
|               |         | Summer | 242  | 0.21                               | 0.25                               | 0.04                        | 20.8    | 0.22                          | 62.5    | 0.83     |
|               |         | Fall   | 238  | 0.46                               | 0.56                               | 0.10                        | 22.6    | 0.56                          | 66.4    | 0.64     |
|               |         | All    | 940  | 0.74                               | 0.68                               | -0.06                       | -7.7    | 0.77                          | 51.0    | 0.79     |
| South         | CSN     | Winter | 258  | 1.36                               | 1.41                               | 0.05                        | 4.0     | 1.05                          | 55.2    | 0.61     |
|               |         | Spring | 291  | 0.69                               | 0.65                               | -0.05                       | -6.6    | 0.66                          | 54.8    | 0.70     |
|               |         | Summer | 288  | 0.39                               | 0.22                               | -0.17                       | -43.9   | 0.29                          | 59.5    | 0.46     |
|               |         | Fall   | 274  | 0.39                               | 0.38                               | -0.01                       | -1.8    | 0.44                          | 71.9    | 0.51     |
|               |         | All    | 1111 | 0.69                               | 0.65                               | -0.04                       | -6.5    | 0.66                          | 58.0    | 0.70     |
|               | IMPROVE | Winter | 226  | 0.88                               | 0.85                               | -0.03                       | -2.9    | 1.07                          | 69.1    | 0.50     |
|               |         | Spring | 271  | 0.48                               | 0.40                               | -0.08                       | -16.3   | 0.54                          | 61.5    | 0.66     |
|               |         | Summer | 273  | 0.24                               | 0.19                               | -0.04                       | -18.4   | 0.19                          | 54.8    | 0.46     |
|               |         | Fall   | 245  | 0.21                               | 0.26                               | 0.05                        | 25.6    | 0.35                          | 86.9    | 0.35     |
|               |         | All    | 1015 | 0.44                               | 0.41                               | -0.03                       | -5.8    | 0.61                          | 66.8    | 0.59     |
| Southwest     | CSN     | Winter | 183  | 2.00                               | 1.06                               | -0.94                       | -47.1   | 2.34                          | 62.3    | 0.50     |
|               |         | Spring | 202  | 0.78                               | 0.45                               | -0.33                       | -42.0   | 0.96                          | 62.6    | 0.68     |

| Region              | Network | Season | N     | Avg. Obs. ( $\mu\text{g m}^{-3}$ ) | Avg. Mod. ( $\mu\text{g m}^{-3}$ ) | MB ( $\mu\text{g m}^{-3}$ ) | NMB (%) | RMSE ( $\mu\text{g m}^{-3}$ ) | NME (%) | r     |
|---------------------|---------|--------|-------|------------------------------------|------------------------------------|-----------------------------|---------|-------------------------------|---------|-------|
|                     |         | Summer | 191   | 0.32                               | 0.22                               | -0.10                       | -31.2   | 0.49                          | 104.1   | -0.04 |
|                     |         | Fall   | 184   | 0.63                               | 0.52                               | -0.12                       | -18.3   | 0.97                          | 79.0    | 0.55  |
|                     |         | All    | 760   | 0.92                               | 0.56                               | -0.37                       | -39.8   | 1.36                          | 68.8    | 0.59  |
|                     | IMPROVE | Winter | 840   | 0.23                               | 0.20                               | -0.03                       | -13.6   | 0.34                          | 74.4    | 0.64  |
|                     |         | Spring | 959   | 0.19                               | 0.13                               | -0.06                       | -31.0   | 0.22                          | 69.5    | 0.24  |
|                     |         | Summer | 956   | 0.14                               | 0.05                               | -0.08                       | -62.0   | 0.13                          | 67.2    | 0.47  |
|                     |         | Fall   | 916   | 0.12                               | 0.12                               | -0.01                       | -4.4    | 0.19                          | 73.5    | 0.41  |
| All                 | 3671    | 0.17   | 0.12  | -0.05                              | -27.3                              | 0.23                        | 71.3    | 0.51                          |         |       |
| N. Rockies & Plains | CSN     | Winter | 141   | 1.38                               | 0.93                               | -0.45                       | -32.8   | 1.17                          | 54.1    | 0.75  |
|                     |         | Spring | 149   | 0.92                               | 0.69                               | -0.23                       | -25.5   | 0.77                          | 47.7    | 0.72  |
|                     |         | Summer | 155   | 0.32                               | 0.36                               | 0.04                        | 14.2    | 0.87                          | 93.1    | 0.42  |
|                     |         | Fall   | 141   | 0.53                               | 0.62                               | 0.09                        | 16.9    | 0.67                          | 70.0    | 0.66  |
|                     |         | All    | 586   | 0.78                               | 0.64                               | -0.14                       | -17.4   | 0.89                          | 59.0    | 0.66  |
|                     | IMPROVE | Winter | 516   | 0.32                               | 0.24                               | -0.09                       | -26.6   | 0.52                          | 74.6    | 0.47  |
|                     |         | Spring | 589   | 0.26                               | 0.24                               | -0.03                       | -10.8   | 0.25                          | 55.9    | 0.76  |
|                     |         | Summer | 608   | 0.16                               | 0.25                               | 0.09                        | 59.5    | 0.85                          | 152.8   | 0.46  |
|                     |         | Fall   | 571   | 0.17                               | 0.32                               | 0.16                        | 95.7    | 0.48                          | 137.5   | 0.61  |
|                     |         | All    | 2284  | 0.22                               | 0.26                               | 0.04                        | 17.0    | 0.57                          | 95.2    | 0.37  |
| Northwest           | CSN     | Winter | 123   | 1.45                               | 1.39                               | -0.06                       | -4.2    | 2.15                          | 77.4    | 0.33  |
|                     |         | Spring | 135   | 0.55                               | 1.14                               | 0.59                        | 106.7   | 1.45                          | 146.2   | 0.39  |
|                     |         | Summer | 130   | 0.45                               | 1.10                               | 0.65                        | 144.7   | 1.66                          | 185.4   | 0.31  |
|                     |         | Fall   | 132   | 0.77                               | 1.25                               | 0.48                        | 62.4    | 1.35                          | 106.7   | 0.36  |
|                     |         | All    | 520   | 0.79                               | 1.22                               | 0.42                        | 53.2    | 1.67                          | 112.3   | 0.28  |
|                     | IMPROVE | Winter | 419   | 0.26                               | 0.28                               | 0.03                        | 10.3    | 0.75                          | 109.6   | 0.39  |
|                     |         | Spring | 472   | 0.13                               | 0.29                               | 0.16                        | 117.5   | 0.67                          | 155.7   | 0.71  |
|                     |         | Summer | 470   | 0.21                               | 0.38                               | 0.17                        | 84.7    | 0.80                          | 137.2   | 0.44  |
|                     |         | Fall   | 458   | 0.19                               | 0.40                               | 0.22                        | 117.0   | 0.69                          | 160.6   | 0.52  |
|                     |         | All    | 1819  | 0.19                               | 0.34                               | 0.15                        | 75.8    | 0.73                          | 137.8   | 0.39  |
| West                | CSN     | Winter | 226   | 4.32                               | 2.98                               | -1.34                       | -31.0   | 3.65                          | 48.4    | 0.78  |
|                     |         | Spring | 251   | 1.53                               | 0.92                               | -0.61                       | -40.1   | 1.41                          | 47.7    | 0.74  |
|                     |         | Summer | 252   | 1.45                               | 1.06                               | -0.39                       | -26.6   | 1.01                          | 42.8    | 0.82  |
|                     |         | Fall   | 233   | 1.87                               | 1.31                               | -0.56                       | -29.9   | 2.48                          | 57.8    | 0.50  |
|                     |         | All    | 962   | 2.25                               | 1.54                               | -0.71                       | -31.7   | 2.33                          | 49.2    | 0.77  |
|                     | IMPROVE | Winter | 492   | 0.83                               | 0.77                               | -0.06                       | -7.2    | 1.53                          | 57.0    | 0.87  |
|                     |         | Spring | 600   | 0.45                               | 0.40                               | -0.05                       | -11.6   | 0.52                          | 56.9    | 0.63  |
|                     |         | Summer | 579   | 0.37                               | 0.46                               | 0.09                        | 24.2    | 0.50                          | 76.9    | 0.55  |
|                     |         | Fall   | 539   | 0.49                               | 0.52                               | 0.02                        | 4.9     | 0.92                          | 76.1    | 0.67  |
|                     |         | All    | 2210  | 0.53                               | 0.53                               | 0.00                        | 0.3     | 0.93                          | 65.0    | 0.81  |
| All                 | CSN     | Winter | 2838  | 2.14                               | 2.06                               | -0.08                       | -3.9    | 1.84                          | 49.2    | 0.68  |
|                     |         | Spring | 3130  | 1.27                               | 1.09                               | -0.17                       | -13.7   | 1.15                          | 51.3    | 0.73  |
|                     |         | Summer | 3027  | 0.53                               | 0.44                               | -0.09                       | -17.2   | 0.68                          | 65.4    | 0.59  |
|                     |         | Fall   | 2932  | 0.69                               | 0.81                               | 0.12                        | 17.6    | 1.07                          | 72.8    | 0.52  |
|                     |         | All    | 11927 | 1.15                               | 1.09                               | -0.06                       | -5.1    | 1.25                          | 55.2    | 0.71  |
|                     | IMPROVE | Winter | 3666  | 0.58                               | 0.62                               | 0.03                        | 5.8     | 0.90                          | 66.9    | 0.77  |
|                     |         | Spring | 4236  | 0.36                               | 0.35                               | -0.02                       | -4.1    | 0.51                          | 66.1    | 0.63  |
|                     |         | Summer | 4228  | 0.20                               | 0.23                               | 0.02                        | 11.7    | 0.48                          | 85.7    | 0.47  |
|                     |         | Fall   | 4018  | 0.23                               | 0.32                               | 0.08                        | 35.4    | 0.52                          | 92.9    | 0.56  |
|                     |         | All    | 16148 | 0.34                               | 0.37                               | 0.03                        | 9.0     | 0.62                          | 74.1    | 0.69  |



Table S14. Performance statistics for PM<sub>2.5</sub> OC at CSN and IMPROVE sites for the 2015 base case.

| Region        | Network | Season | N    | Avg. Obs. (µg m <sup>-3</sup> ) | Avg. Mod. (µg m <sup>-3</sup> ) | MB (µg m <sup>-3</sup> ) | NMB (%) | RMSE (µg m <sup>-3</sup> ) | NME (%) | r    |
|---------------|---------|--------|------|---------------------------------|---------------------------------|--------------------------|---------|----------------------------|---------|------|
| Northeast     | CSN     | Winter | 690  | 2.55                            | 3.74                            | 1.19                     | 46.4    | 2.27                       | 62.9    | 0.63 |
|               |         | Spring | 729  | 2.34                            | 2.56                            | 0.22                     | 9.4     | 1.69                       | 48.4    | 0.57 |
|               |         | Summer | 707  | 3.30                            | 2.19                            | -1.11                    | -33.7   | 1.96                       | 42.0    | 0.49 |
|               |         | Fall   | 696  | 2.58                            | 2.63                            | 0.06                     | 2.2     | 1.61                       | 38.7    | 0.73 |
|               |         | All    | 2822 | 2.69                            | 2.77                            | 0.08                     | 3.0     | 1.90                       | 47.5    | 0.51 |
|               | IMPROVE | Winter | 403  | 0.98                            | 1.72                            | 0.75                     | 76.2    | 1.33                       | 89.4    | 0.78 |
|               |         | Spring | 462  | 0.87                            | 1.06                            | 0.18                     | 21.2    | 0.81                       | 59.3    | 0.65 |
|               |         | Summer | 467  | 1.45                            | 1.07                            | -0.38                    | -26.4   | 0.89                       | 40.7    | 0.65 |
|               |         | Fall   | 472  | 1.00                            | 1.13                            | 0.12                     | 12.2    | 0.89                       | 44.7    | 0.70 |
|               |         | All    | 1804 | 1.08                            | 1.23                            | 0.15                     | 13.6    | 0.99                       | 55.4    | 0.61 |
| Southeast     | CSN     | Winter | 360  | 2.66                            | 3.10                            | 0.44                     | 16.6    | 1.87                       | 43.7    | 0.59 |
|               |         | Spring | 425  | 2.62                            | 2.28                            | -0.34                    | -12.9   | 1.68                       | 44.9    | 0.42 |
|               |         | Summer | 408  | 3.07                            | 2.84                            | -0.23                    | -7.6    | 1.57                       | 37.3    | 0.50 |
|               |         | Fall   | 402  | 2.78                            | 2.77                            | -0.01                    | -0.4    | 1.77                       | 44.9    | 0.68 |
|               |         | All    | 1595 | 2.79                            | 2.73                            | -0.05                    | -1.9    | 1.72                       | 42.5    | 0.56 |
|               | IMPROVE | Winter | 385  | 1.26                            | 1.81                            | 0.55                     | 43.6    | 1.70                       | 73.3    | 0.60 |
|               |         | Spring | 440  | 1.55                            | 1.56                            | 0.01                     | 0.6     | 5.73                       | 72.6    | 0.07 |
|               |         | Summer | 423  | 1.55                            | 1.63                            | 0.08                     | 5.0     | 1.40                       | 53.0    | 0.59 |
|               |         | Fall   | 410  | 1.29                            | 1.51                            | 0.23                     | 17.5    | 1.54                       | 58.0    | 0.73 |
|               |         | All    | 1658 | 1.42                            | 1.62                            | 0.21                     | 14.5    | 3.23                       | 64.0    | 0.19 |
| Ohio Valley   | CSN     | Winter | 484  | 2.21                            | 2.59                            | 0.38                     | 17.4    | 1.21                       | 38.0    | 0.54 |
|               |         | Spring | 558  | 2.49                            | 2.13                            | -0.36                    | -14.4   | 1.31                       | 39.0    | 0.49 |
|               |         | Summer | 529  | 3.35                            | 2.28                            | -1.07                    | -32.0   | 1.92                       | 40.2    | 0.47 |
|               |         | Fall   | 524  | 2.92                            | 2.46                            | -0.46                    | -15.6   | 1.56                       | 39.1    | 0.63 |
|               |         | All    | 2095 | 2.75                            | 2.36                            | -0.39                    | -14.2   | 1.53                       | 39.2    | 0.47 |
|               | IMPROVE | Winter | 213  | 0.97                            | 1.47                            | 0.49                     | 50.6    | 1.40                       | 68.7    | 0.43 |
|               |         | Spring | 239  | 1.19                            | 1.46                            | 0.27                     | 22.7    | 6.33                       | 77.4    | 0.12 |
|               |         | Summer | 245  | 1.51                            | 1.45                            | -0.06                    | -4.0    | 1.05                       | 40.6    | 0.51 |
|               |         | Fall   | 233  | 1.31                            | 1.47                            | 0.16                     | 12.1    | 1.24                       | 52.2    | 0.65 |
|               |         | All    | 930  | 1.26                            | 1.46                            | 0.21                     | 16.4    | 3.38                       | 57.6    | 0.21 |
| Upper Midwest | CSN     | Winter | 255  | 1.85                            | 2.63                            | 0.78                     | 42.2    | 1.69                       | 59.1    | 0.46 |
|               |         | Spring | 289  | 2.03                            | 2.09                            | 0.06                     | 3.0     | 1.16                       | 43.0    | 0.55 |
|               |         | Summer | 287  | 2.99                            | 2.00                            | -0.99                    | -33.2   | 1.61                       | 41.9    | 0.55 |
|               |         | Fall   | 278  | 2.56                            | 2.34                            | -0.22                    | -8.6    | 1.63                       | 41.6    | 0.61 |
|               |         | All    | 1109 | 2.37                            | 2.25                            | -0.12                    | -5.0    | 1.53                       | 45.1    | 0.43 |
|               | IMPROVE | Winter | 243  | 0.67                            | 1.12                            | 0.44                     | 66.2    | 0.75                       | 73.6    | 0.85 |
|               |         | Spring | 274  | 0.90                            | 0.97                            | 0.07                     | 7.4     | 0.83                       | 55.8    | 0.62 |
|               |         | Summer | 271  | 1.71                            | 0.99                            | -0.72                    | -42.0   | 1.46                       | 51.3    | 0.48 |
|               |         | Fall   | 268  | 1.08                            | 1.20                            | 0.12                     | 11.1    | 0.85                       | 46.7    | 0.72 |
|               |         | All    | 1056 | 1.10                            | 1.07                            | -0.03                    | -3.1    | 1.02                       | 54.2    | 0.50 |
| South         | CSN     | Winter | 254  | 2.59                            | 2.67                            | 0.09                     | 3.3     | 1.67                       | 41.1    | 0.62 |
|               |         | Spring | 289  | 2.12                            | 1.55                            | -0.58                    | -27.1   | 1.10                       | 42.1    | 0.58 |
|               |         | Summer | 278  | 2.62                            | 2.31                            | -0.31                    | -11.9   | 1.47                       | 40.1    | 0.65 |
|               |         | Fall   | 274  | 2.89                            | 2.23                            | -0.66                    | -22.7   | 1.37                       | 37.4    | 0.63 |
|               |         | All    | 1095 | 2.55                            | 2.17                            | -0.37                    | -14.7   | 1.41                       | 40.0    | 0.63 |
|               | IMPROVE | Winter | 222  | 0.76                            | 2.21                            | 1.46                     | 192.7   | 16.61                      | 227.6   | 0.29 |
|               |         | Spring | 271  | 0.86                            | 0.56                            | -0.30                    | -35.0   | 0.71                       | 49.7    | 0.68 |
|               |         | Summer | 273  | 1.32                            | 1.15                            | -0.17                    | -12.8   | 1.01                       | 49.2    | 0.61 |
|               |         | Fall   | 245  | 1.13                            | 1.06                            | -0.07                    | -5.9    | 2.27                       | 54.5    | 0.32 |
|               |         | All    | 1011 | 1.03                            | 1.20                            | 0.18                     | 17.3    | 7.89                       | 79.6    | 0.18 |
| Southwest     | CSN     | Winter | 179  | 2.65                            | 3.33                            | 0.68                     | 25.8    | 2.08                       | 56.0    | 0.49 |
|               |         | Spring | 193  | 1.58                            | 1.59                            | 0.01                     | 0.8     | 0.98                       | 48.0    | 0.46 |

| Region              | Network | Season | N     | Avg. Obs. ( $\mu\text{g m}^{-3}$ ) | Avg. Mod. ( $\mu\text{g m}^{-3}$ ) | MB ( $\mu\text{g m}^{-3}$ ) | NMB (%) | RMSE ( $\mu\text{g m}^{-3}$ ) | NME (%) | r    |
|---------------------|---------|--------|-------|------------------------------------|------------------------------------|-----------------------------|---------|-------------------------------|---------|------|
|                     |         | Summer | 189   | 2.37                               | 1.61                               | -0.76                       | -32.0   | 1.54                          | 42.7    | 0.72 |
|                     |         | Fall   | 181   | 2.24                               | 1.93                               | -0.31                       | -13.7   | 1.19                          | 39.1    | 0.54 |
|                     |         | All    | 742   | 2.20                               | 2.10                               | -0.10                       | -4.5    | 1.50                          | 46.7    | 0.58 |
|                     | IMPROVE | Winter | 831   | 0.48                               | 0.43                               | -0.06                       | -11.5   | 0.52                          | 53.6    | 0.80 |
|                     |         | Spring | 959   | 0.44                               | 0.31                               | -0.13                       | -29.6   | 0.34                          | 43.3    | 0.55 |
|                     |         | Summer | 955   | 0.91                               | 0.68                               | -0.23                       | -25.5   | 0.77                          | 48.7    | 0.76 |
|                     |         | Fall   | 913   | 0.57                               | 0.53                               | -0.04                       | -7.4    | 1.58                          | 56.5    | 0.34 |
| All                 | 3658    | 0.60   | 0.49  | -0.12                              | -19.4                              | 0.94                        | 50.4    | 0.55                          |         |      |
| N. Rockies & Plains | CSN     | Winter | 121   | 1.43                               | 1.09                               | -0.34                       | -24.1   | 2.37                          | 70.2    | 0.05 |
|                     |         | Spring | 148   | 1.48                               | 0.74                               | -0.74                       | -49.9   | 1.23                          | 63.1    | 0.39 |
|                     |         | Summer | 151   | 3.58                               | 1.81                               | -1.77                       | -49.5   | 3.20                          | 58.1    | 0.89 |
|                     |         | Fall   | 142   | 2.05                               | 0.92                               | -1.13                       | -55.3   | 1.64                          | 60.3    | 0.35 |
|                     |         | All    | 562   | 2.18                               | 1.15                               | -1.03                       | -47.4   | 2.24                          | 61.2    | 0.80 |
|                     | IMPROVE | Winter | 536   | 0.29                               | 0.23                               | -0.06                       | -20.2   | 0.57                          | 75.2    | 0.13 |
|                     |         | Spring | 608   | 0.46                               | 0.39                               | -0.07                       | -15.6   | 2.21                          | 88.5    | 0.07 |
|                     |         | Summer | 602   | 3.11                               | 2.82                               | -0.29                       | -9.3    | 13.66                         | 79.6    | 0.40 |
|                     |         | Fall   | 570   | 0.91                               | 0.83                               | -0.09                       | -9.7    | 2.35                          | 74.6    | 0.48 |
|                     |         | All    | 2316  | 1.22                               | 1.09                               | -0.13                       | -10.6   | 7.16                          | 79.4    | 0.42 |
| Northwest           | CSN     | Winter | 122   | 3.16                               | 5.56                               | 2.40                        | 75.8    | 4.96                          | 97.2    | 0.57 |
|                     |         | Spring | 135   | 2.32                               | 4.20                               | 1.88                        | 80.8    | 3.99                          | 105.2   | 0.41 |
|                     |         | Summer | 134   | 3.36                               | 4.33                               | 0.97                        | 28.9    | 3.69                          | 72.8    | 0.59 |
|                     |         | Fall   | 129   | 3.80                               | 4.65                               | 0.85                        | 22.3    | 5.46                          | 66.7    | 0.26 |
|                     |         | All    | 520   | 3.15                               | 4.66                               | 1.51                        | 47.9    | 4.56                          | 82.9    | 0.40 |
|                     | IMPROVE | Winter | 419   | 0.43                               | 0.83                               | 0.40                        | 93.4    | 2.23                          | 162.7   | 0.69 |
|                     |         | Spring | 476   | 0.59                               | 0.83                               | 0.23                        | 39.0    | 2.00                          | 119.5   | 0.57 |
|                     |         | Summer | 466   | 2.62                               | 3.20                               | 0.58                        | 22.3    | 10.21                         | 86.0    | 0.59 |
|                     |         | Fall   | 455   | 1.06                               | 2.69                               | 1.62                        | 152.4   | 23.81                         | 224.7   | 0.14 |
|                     |         | All    | 1816  | 1.19                               | 1.90                               | 0.71                        | 59.4    | 13.08                         | 127.7   | 0.30 |
| West                | CSN     | Winter | 217   | 4.10                               | 3.79                               | -0.31                       | -7.6    | 1.90                          | 32.1    | 0.69 |
|                     |         | Spring | 249   | 2.14                               | 1.76                               | -0.37                       | -17.5   | 0.82                          | 31.1    | 0.78 |
|                     |         | Summer | 246   | 2.69                               | 2.07                               | -0.63                       | -23.3   | 1.52                          | 37.6    | 0.62 |
|                     |         | Fall   | 229   | 3.62                               | 3.17                               | -0.46                       | -12.6   | 2.05                          | 33.5    | 0.64 |
|                     |         | All    | 941   | 3.10                               | 2.65                               | -0.45                       | -14.4   | 1.62                          | 33.6    | 0.71 |
|                     | IMPROVE | Winter | 497   | 0.67                               | 0.58                               | -0.09                       | -13.0   | 0.71                          | 58.2    | 0.83 |
|                     |         | Spring | 601   | 0.70                               | 0.41                               | -0.29                       | -41.9   | 0.55                          | 53.9    | 0.63 |
|                     |         | Summer | 579   | 1.77                               | 1.97                               | 0.21                        | 11.7    | 4.15                          | 72.4    | 0.52 |
|                     |         | Fall   | 538   | 1.25                               | 1.32                               | 0.08                        | 6.1     | 3.21                          | 73.6    | 0.51 |
|                     |         | All    | 2215  | 1.11                               | 1.08                               | -0.03                       | -2.4    | 2.68                          | 67.6    | 0.55 |
| All                 | CSN     | Winter | 2682  | 2.55                               | 3.18                               | 0.63                        | 24.7    | 2.13                          | 51.6    | 0.56 |
|                     |         | Spring | 3015  | 2.25                               | 2.16                               | -0.09                       | -4.1    | 1.60                          | 46.6    | 0.50 |
|                     |         | Summer | 2929  | 3.09                               | 2.32                               | -0.77                       | -24.9   | 1.97                          | 43.1    | 0.64 |
|                     |         | Fall   | 2855  | 2.79                               | 2.56                               | -0.23                       | -8.3    | 1.97                          | 41.8    | 0.56 |
|                     |         | All    | 11481 | 2.67                               | 2.54                               | -0.13                       | -4.9    | 1.92                          | 45.4    | 0.55 |
|                     | IMPROVE | Winter | 3749  | 0.66                               | 0.96                               | 0.29                        | 44.0    | 4.21                          | 87.3    | 0.28 |
|                     |         | Spring | 4330  | 0.75                               | 0.72                               | -0.03                       | -4.4    | 2.62                          | 67.7    | 0.13 |
|                     |         | Summer | 4281  | 1.75                               | 1.66                               | -0.09                       | -5.4    | 6.37                          | 65.2    | 0.48 |
|                     |         | Fall   | 4104  | 0.99                               | 1.21                               | 0.22                        | 22.0    | 8.14                          | 79.3    | 0.17 |
|                     |         | All    | 16464 | 1.05                               | 1.14                               | 0.09                        | 8.3     | 5.74                          | 72.1    | 0.31 |

Table S15. Performance statistics for PM<sub>2.5</sub> EC at CSN and IMPROVE sites for the 2015 base case.

| Region        | Network | Season | N    | Avg. Obs. ( $\mu\text{g m}^{-3}$ ) | Avg. Mod. ( $\mu\text{g m}^{-3}$ ) | MB ( $\mu\text{g m}^{-3}$ ) | NMB (%) | RMSE ( $\mu\text{g m}^{-3}$ ) | NME (%) | <i>r</i> |
|---------------|---------|--------|------|------------------------------------|------------------------------------|-----------------------------|---------|-------------------------------|---------|----------|
| Northeast     | CSN     | Winter | 690  | 0.75                               | 0.99                               | 0.25                        | 33.0    | 0.67                          | 62.8    | 0.55     |
|               |         | Spring | 729  | 0.63                               | 0.78                               | 0.15                        | 24.3    | 0.64                          | 59.1    | 0.52     |
|               |         | Summer | 707  | 0.62                               | 0.76                               | 0.14                        | 21.7    | 0.47                          | 49.8    | 0.52     |
|               |         | Fall   | 696  | 0.66                               | 0.88                               | 0.22                        | 33.7    | 0.73                          | 60.5    | 0.58     |
|               |         | All    | 2822 | 0.66                               | 0.85                               | 0.19                        | 28.4    | 0.63                          | 58.3    | 0.55     |
|               | IMPROVE | Winter | 403  | 0.22                               | 0.39                               | 0.17                        | 77.4    | 0.29                          | 88.8    | 0.81     |
|               |         | Spring | 462  | 0.16                               | 0.27                               | 0.11                        | 68.4    | 0.21                          | 82.9    | 0.76     |
|               |         | Summer | 467  | 0.21                               | 0.30                               | 0.09                        | 44.8    | 0.24                          | 66.4    | 0.65     |
|               |         | Fall   | 472  | 0.19                               | 0.30                               | 0.10                        | 52.7    | 0.20                          | 67.5    | 0.82     |
|               |         | All    | 1804 | 0.19                               | 0.31                               | 0.12                        | 60.1    | 0.24                          | 75.8    | 0.77     |
| Southeast     | CSN     | Winter | 360  | 0.58                               | 0.84                               | 0.26                        | 45.8    | 0.56                          | 67.7    | 0.54     |
|               |         | Spring | 425  | 0.47                               | 0.63                               | 0.16                        | 33.5    | 0.49                          | 65.9    | 0.44     |
|               |         | Summer | 408  | 0.47                               | 0.59                               | 0.13                        | 26.9    | 0.45                          | 62.5    | 0.32     |
|               |         | Fall   | 402  | 0.55                               | 0.78                               | 0.23                        | 42.2    | 0.53                          | 61.2    | 0.65     |
|               |         | All    | 1595 | 0.51                               | 0.71                               | 0.19                        | 37.4    | 0.51                          | 64.3    | 0.52     |
|               | IMPROVE | Winter | 385  | 0.29                               | 0.46                               | 0.17                        | 59.3    | 0.39                          | 76.4    | 0.74     |
|               |         | Spring | 440  | 0.26                               | 0.39                               | 0.12                        | 47.7    | 0.57                          | 77.0    | 0.48     |
|               |         | Summer | 423  | 0.25                               | 0.26                               | 0.01                        | 4.6     | 0.19                          | 41.2    | 0.79     |
|               |         | Fall   | 410  | 0.26                               | 0.36                               | 0.10                        | 41.0    | 0.31                          | 59.4    | 0.77     |
|               |         | All    | 1658 | 0.26                               | 0.36                               | 0.10                        | 38.5    | 0.40                          | 63.9    | 0.65     |
| Ohio Valley   | CSN     | Winter | 484  | 0.50                               | 0.74                               | 0.24                        | 49.0    | 0.45                          | 68.1    | 0.48     |
|               |         | Spring | 558  | 0.59                               | 0.68                               | 0.08                        | 13.9    | 0.47                          | 55.7    | 0.38     |
|               |         | Summer | 529  | 0.72                               | 0.79                               | 0.07                        | 9.6     | 0.40                          | 40.7    | 0.54     |
|               |         | Fall   | 524  | 0.65                               | 0.79                               | 0.14                        | 22.2    | 0.41                          | 45.7    | 0.60     |
|               |         | All    | 2095 | 0.62                               | 0.75                               | 0.13                        | 21.3    | 0.43                          | 51.0    | 0.50     |
|               | IMPROVE | Winter | 213  | 0.21                               | 0.35                               | 0.13                        | 61.6    | 0.31                          | 76.4    | 0.43     |
|               |         | Spring | 239  | 0.22                               | 0.33                               | 0.12                        | 53.6    | 1.28                          | 83.4    | 0.12     |
|               |         | Summer | 245  | 0.23                               | 0.25                               | 0.02                        | 7.3     | 0.14                          | 37.2    | 0.75     |
|               |         | Fall   | 233  | 0.24                               | 0.33                               | 0.08                        | 34.3    | 0.25                          | 59.9    | 0.48     |
|               |         | All    | 930  | 0.23                               | 0.31                               | 0.09                        | 37.6    | 0.68                          | 63.1    | 0.20     |
| Upper Midwest | CSN     | Winter | 255  | 0.35                               | 0.67                               | 0.32                        | 91.0    | 0.48                          | 99.1    | 0.53     |
|               |         | Spring | 289  | 0.38                               | 0.57                               | 0.19                        | 48.9    | 0.36                          | 67.1    | 0.56     |
|               |         | Summer | 287  | 0.52                               | 0.71                               | 0.19                        | 35.6    | 0.39                          | 53.5    | 0.67     |
|               |         | Fall   | 278  | 0.49                               | 0.70                               | 0.21                        | 43.2    | 0.46                          | 56.3    | 0.64     |
|               |         | All    | 1109 | 0.44                               | 0.66                               | 0.22                        | 50.9    | 0.42                          | 65.8    | 0.61     |
|               | IMPROVE | Winter | 243  | 0.16                               | 0.29                               | 0.13                        | 80.4    | 0.19                          | 84.7    | 0.85     |
|               |         | Spring | 274  | 0.18                               | 0.26                               | 0.08                        | 41.4    | 0.19                          | 62.8    | 0.73     |
|               |         | Summer | 271  | 0.27                               | 0.34                               | 0.07                        | 26.7    | 0.25                          | 52.1    | 0.71     |
|               |         | Fall   | 268  | 0.23                               | 0.35                               | 0.12                        | 53.9    | 0.25                          | 70.6    | 0.71     |
|               |         | All    | 1056 | 0.21                               | 0.31                               | 0.10                        | 46.8    | 0.22                          | 65.2    | 0.73     |
| South         | CSN     | Winter | 254  | 0.57                               | 0.81                               | 0.24                        | 41.9    | 0.47                          | 57.9    | 0.67     |
|               |         | Spring | 289  | 0.40                               | 0.55                               | 0.15                        | 37.1    | 0.32                          | 56.7    | 0.57     |
|               |         | Summer | 278  | 0.40                               | 0.51                               | 0.12                        | 29.4    | 0.27                          | 52.7    | 0.56     |
|               |         | Fall   | 274  | 0.51                               | 0.67                               | 0.16                        | 31.2    | 0.33                          | 49.3    | 0.64     |
|               |         | All    | 1095 | 0.47                               | 0.63                               | 0.16                        | 35.2    | 0.35                          | 54.1    | 0.65     |
|               | IMPROVE | Winter | 222  | 0.15                               | 0.51                               | 0.36                        | 241.2   | 3.54                          | 257.2   | 0.41     |
|               |         | Spring | 271  | 0.15                               | 0.16                               | 0.01                        | 7.1     | 0.13                          | 48.2    | 0.69     |
|               |         | Summer | 273  | 0.15                               | 0.17                               | 0.03                        | 18.5    | 0.14                          | 45.7    | 0.75     |
|               |         | Fall   | 245  | 0.17                               | 0.22                               | 0.06                        | 34.1    | 0.48                          | 65.4    | 0.21     |
|               |         | All    | 1011 | 0.15                               | 0.26                               | 0.10                        | 68.0    | 1.68                          | 97.4    | 0.27     |
| Southwest     | CSN     | Winter | 179  | 0.79                               | 1.14                               | 0.35                        | 45.1    | 0.69                          | 68.5    | 0.51     |
|               |         | Spring | 193  | 0.37                               | 0.64                               | 0.27                        | 73.2    | 0.48                          | 93.9    | 0.43     |

| Region              | Network   | Season | N      | Avg. Obs.<br>( $\mu\text{g m}^{-3}$ ) | Avg. Mod.<br>( $\mu\text{g m}^{-3}$ ) | MB<br>( $\mu\text{g m}^{-3}$ ) | NMB<br>(%) | RMSE<br>( $\mu\text{g m}^{-3}$ ) | NME<br>(%) | r     |      |
|---------------------|-----------|--------|--------|---------------------------------------|---------------------------------------|--------------------------------|------------|----------------------------------|------------|-------|------|
|                     |           | Summer | 189    | 0.36                                  | 0.59                                  | 0.23                           | 65.0       | 0.43                             | 81.6       | 0.52  |      |
|                     |           | Fall   | 181    | 0.51                                  | 0.76                                  | 0.25                           | 49.2       | 0.46                             | 72.8       | 0.55  |      |
|                     |           | All    | 742    | 0.50                                  | 0.78                                  | 0.28                           | 55.1       | 0.52                             | 76.8       | 0.58  |      |
|                     | IMPROVE   | Winter | 831    | 0.12                                  | 0.14                                  | 0.02                           | 19.7       | 0.17                             | 60.4       | 0.83  |      |
|                     |           | Spring | 959    | 0.07                                  | 0.11                                  | 0.04                           | 64.9       | 0.10                             | 83.3       | 0.68  |      |
|                     |           | Summer | 955    | 0.11                                  | 0.13                                  | 0.02                           | 15.8       | 0.14                             | 58.4       | 0.78  |      |
|                     |           | Fall   | 913    | 0.10                                  | 0.13                                  | 0.03                           | 29.2       | 0.37                             | 77.4       | 0.36  |      |
|                     |           | All    | 3658   | 0.10                                  | 0.13                                  | 0.03                           | 29.1       | 0.22                             | 68.4       | 0.59  |      |
|                     |           |        |        |                                       |                                       |                                |            |                                  |            |       |      |
| N. Rockies & Plains | CSN       | Winter | 121    | 0.22                                  | 0.35                                  | 0.13                           | 59.4       | 0.56                             | 124.4      | 0.09  |      |
|                     |           | Spring | 148    | 0.19                                  | 0.28                                  | 0.09                           | 47.0       | 0.29                             | 89.7       | 0.51  |      |
|                     |           | Summer | 151    | 0.35                                  | 0.56                                  | 0.21                           | 61.2       | 0.76                             | 80.6       | 0.92  |      |
|                     |           | Fall   | 142    | 0.28                                  | 0.36                                  | 0.08                           | 28.2       | 0.38                             | 80.3       | 0.24  |      |
|                     |           | All    | 562    | 0.26                                  | 0.39                                  | 0.13                           | 49.2       | 0.53                             | 90.2       | 0.65  |      |
|                     | IMPROVE   | Winter | 536    | 0.05                                  | 0.09                                  | 0.04                           | 70.1       | 0.13                             | 117.9      | 0.23  |      |
|                     |           | Spring | 608    | 0.06                                  | 0.12                                  | 0.06                           | 96.1       | 0.46                             | 124.2      | 0.09  |      |
|                     |           | Summer | 602    | 0.26                                  | 0.61                                  | 0.35                           | 133.1      | 2.88                             | 161.8      | 0.40  |      |
|                     |           | Fall   | 570    | 0.11                                  | 0.24                                  | 0.13                           | 124.4      | 0.55                             | 156.1      | 0.37  |      |
|                     |           | All    | 2316   | 0.12                                  | 0.27                                  | 0.15                           | 120.0      | 1.51                             | 151.2      | 0.40  |      |
|                     | Northwest | CSN    | Winter | 122                                   | 0.78                                  | 1.75                           | 0.97       | 123.9                            | 1.88       | 137.4 | 0.54 |
|                     |           |        | Spring | 135                                   | 0.53                                  | 1.66                           | 1.13       | 211.8                            | 2.14       | 218.1 | 0.35 |
| Summer              |           |        | 134    | 0.56                                  | 2.12                                  | 1.56                           | 280.1      | 2.61                             | 290.2      | 0.38  |      |
| Fall                |           |        | 129    | 0.80                                  | 1.86                                  | 1.07                           | 133.6      | 2.00                             | 148.5      | 0.34  |      |
| All                 |           |        | 520    | 0.66                                  | 1.85                                  | 1.19                           | 179.0      | 2.19                             | 190.7      | 0.39  |      |
| IMPROVE             |           | Winter | 419    | 0.09                                  | 0.29                                  | 0.20                           | 231.5      | 0.84                             | 252.8      | 0.78  |      |
|                     |           | Spring | 476    | 0.09                                  | 0.35                                  | 0.26                           | 277.5      | 1.06                             | 294.1      | 0.72  |      |
|                     |           | Summer | 466    | 0.23                                  | 0.89                                  | 0.66                           | 286.3      | 2.57                             | 299.1      | 0.58  |      |
|                     |           | Fall   | 455    | 0.14                                  | 0.71                                  | 0.57                           | 416.3      | 4.93                             | 442.1      | 0.18  |      |
|                     |           | All    | 1816   | 0.14                                  | 0.56                                  | 0.43                           | 309.2      | 2.87                             | 327.2      | 0.37  |      |
| West                |           | CSN    | Winter | 217                                   | 1.08                                  | 1.11                           | 0.03       | 2.7                              | 0.58       | 39.2  | 0.61 |
|                     |           |        | Spring | 249                                   | 0.42                                  | 0.58                           | 0.16       | 37.0                             | 0.47       | 58.2  | 0.42 |
|                     | Summer    |        | 246    | 0.40                                  | 0.65                                  | 0.25                           | 61.1       | 0.37                             | 68.4       | 0.65  |      |
|                     | Fall      |        | 229    | 0.82                                  | 0.96                                  | 0.13                           | 16.4       | 0.57                             | 45.2       | 0.51  |      |
|                     | All       |        | 941    | 0.67                                  | 0.81                                  | 0.15                           | 21.8       | 0.50                             | 48.8       | 0.63  |      |
|                     | IMPROVE   | Winter | 497    | 0.12                                  | 0.17                                  | 0.05                           | 40.5       | 0.23                             | 82.1       | 0.82  |      |
|                     |           | Spring | 601    | 0.09                                  | 0.13                                  | 0.04                           | 49.0       | 0.12                             | 78.0       | 0.72  |      |
|                     |           | Summer | 579    | 0.17                                  | 0.41                                  | 0.24                           | 137.3      | 0.90                             | 161.3      | 0.39  |      |
|                     |           | Fall   | 538    | 0.15                                  | 0.30                                  | 0.15                           | 98.3       | 0.67                             | 129.3      | 0.54  |      |
|                     |           | All    | 2215   | 0.13                                  | 0.26                                  | 0.12                           | 90.4       | 0.58                             | 120.9      | 0.50  |      |
|                     | All       | CSN    | Winter | 2682                                  | 0.63                                  | 0.90                           | 0.27       | 43.0                             | 0.69       | 68.0  | 0.54 |
|                     |           |        | Spring | 3015                                  | 0.50                                  | 0.69                           | 0.19       | 38.8                             | 0.66       | 69.5  | 0.41 |
| Summer              |           |        | 2929   | 0.53                                  | 0.74                                  | 0.21                           | 39.3       | 0.71                             | 64.8       | 0.44  |      |
| Fall                |           |        | 2855   | 0.60                                  | 0.83                                  | 0.23                           | 37.8       | 0.68                             | 61.1       | 0.54  |      |
| All                 |           |        | 11481  | 0.56                                  | 0.79                                  | 0.22                           | 39.7       | 0.68                             | 65.7       | 0.49  |      |
| IMPROVE             |           | Winter | 3749   | 0.14                                  | 0.26                                  | 0.11                           | 78.0       | 0.93                             | 102.0      | 0.37  |      |
|                     |           | Spring | 4330   | 0.12                                  | 0.21                                  | 0.09                           | 72.5       | 0.54                             | 97.5       | 0.40  |      |
|                     |           | Summer | 4281   | 0.20                                  | 0.37                                  | 0.17                           | 88.9       | 1.42                             | 116.6      | 0.44  |      |
|                     |           | Fall   | 4104   | 0.16                                  | 0.31                                  | 0.15                           | 91.9       | 1.69                             | 118.9      | 0.18  |      |
|                     |           | All    | 16464  | 0.16                                  | 0.29                                  | 0.13                           | 84.0       | 1.23                             | 110.2      | 0.33  |      |

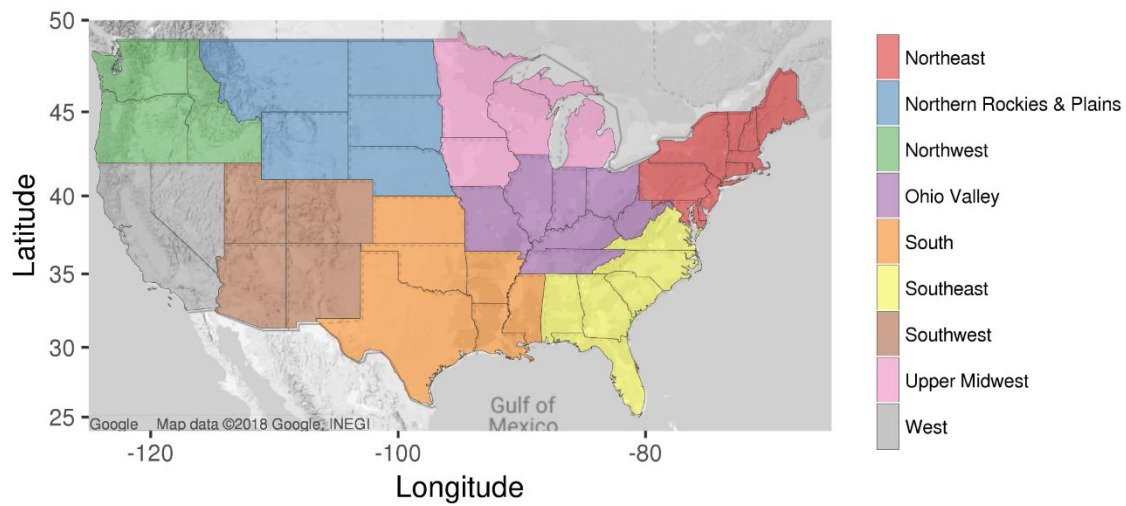

Figure S1. U.S. climate regions (<https://www.ncdc.noaa.gov/monitoring-references/maps/us-climate-regions.php>) used in the CMAQ model performance evaluation.

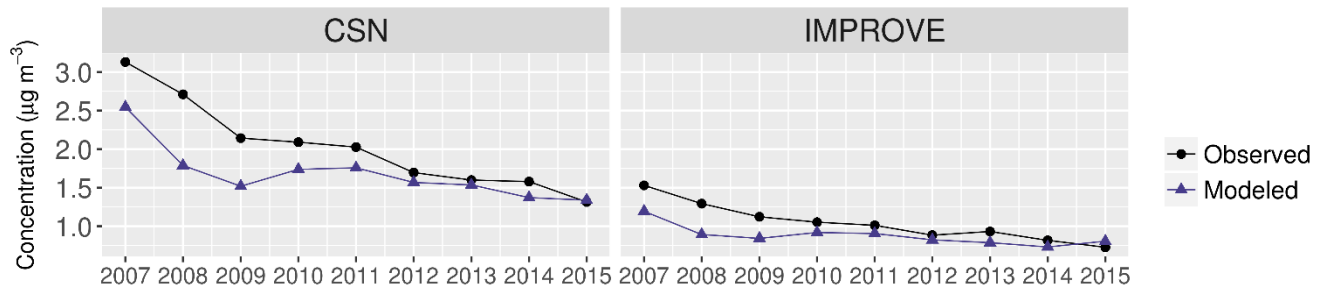

Figure S2. Annual average concentration of sulfate during 2007-2015.

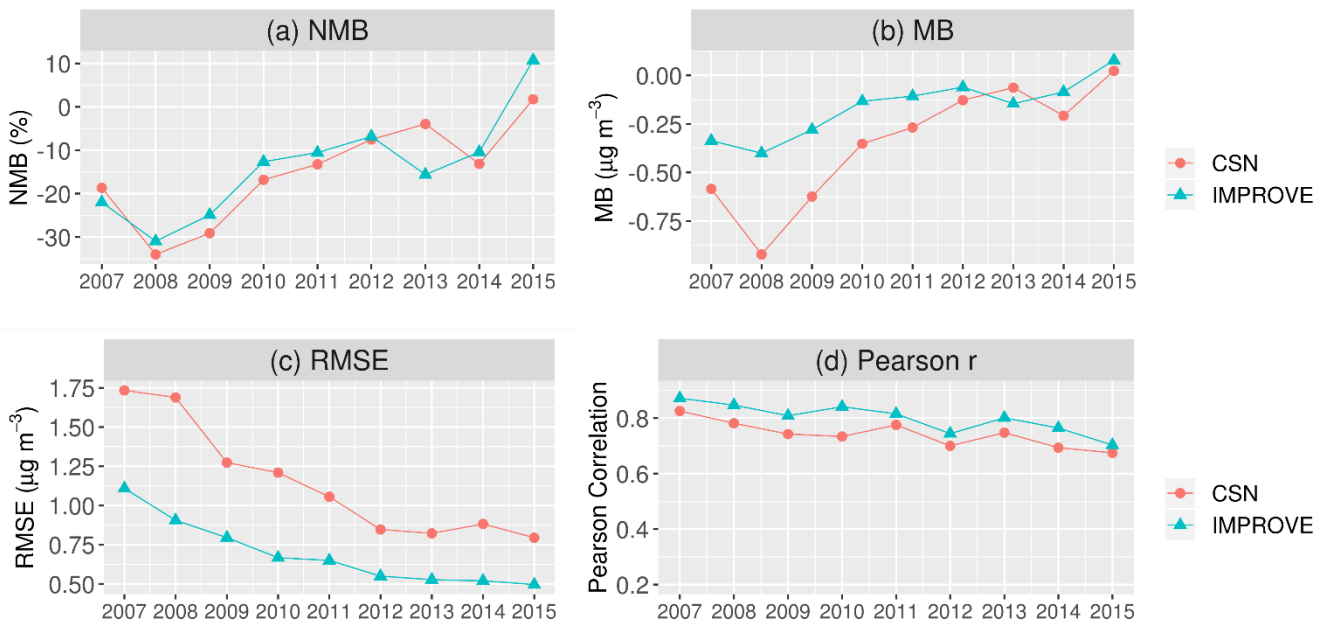

Figure S3. Annual sulfate model performance statistics by year.

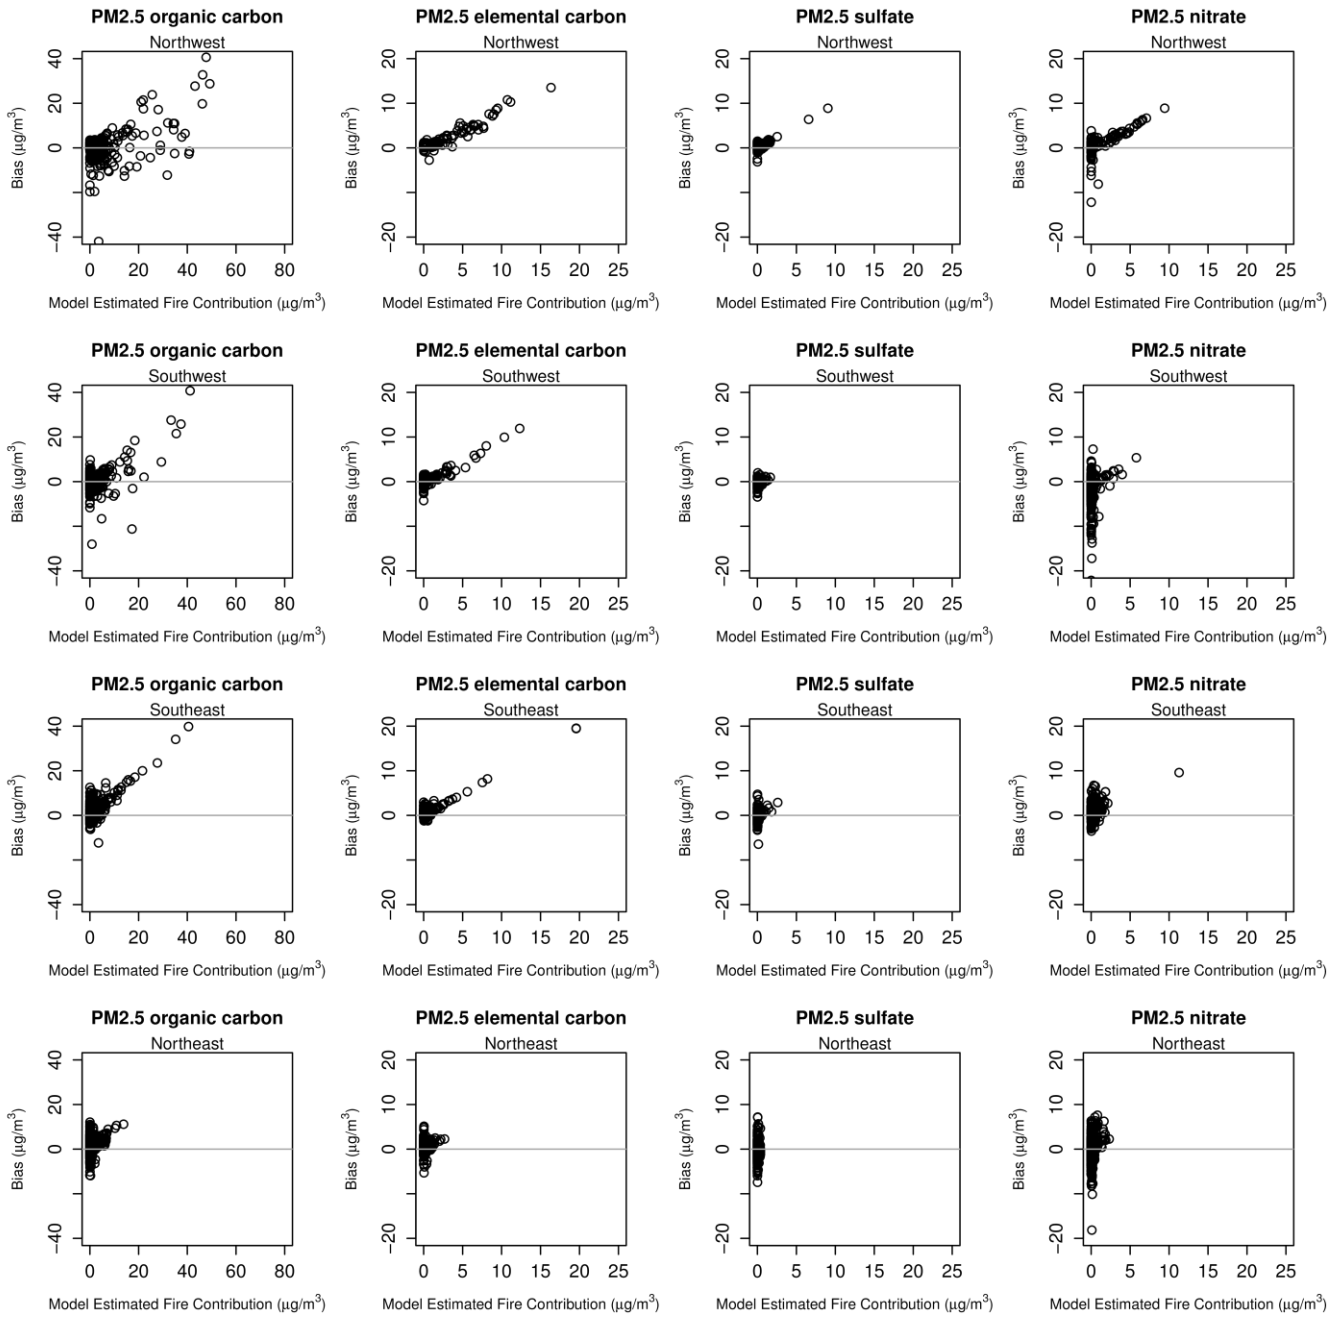

Figure S4. Bias in model predictions of PM<sub>2.5</sub> OC, EC, SO<sub>4</sub><sup>2-</sup>, and NO<sub>3</sub><sup>-</sup> in the Northwest, Southwest, Southeast and Northeast regions as a function of the modeled fire contribution to the concentration.

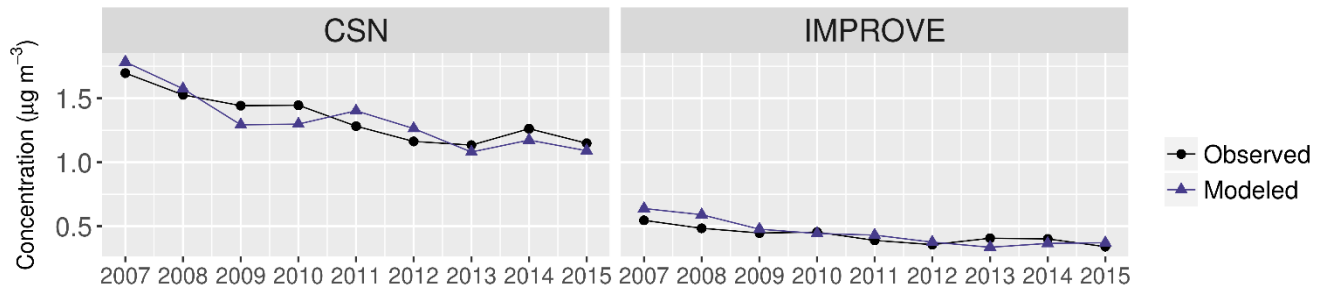

Figure S5. Annual average concentration of nitrate during 2007-2015.

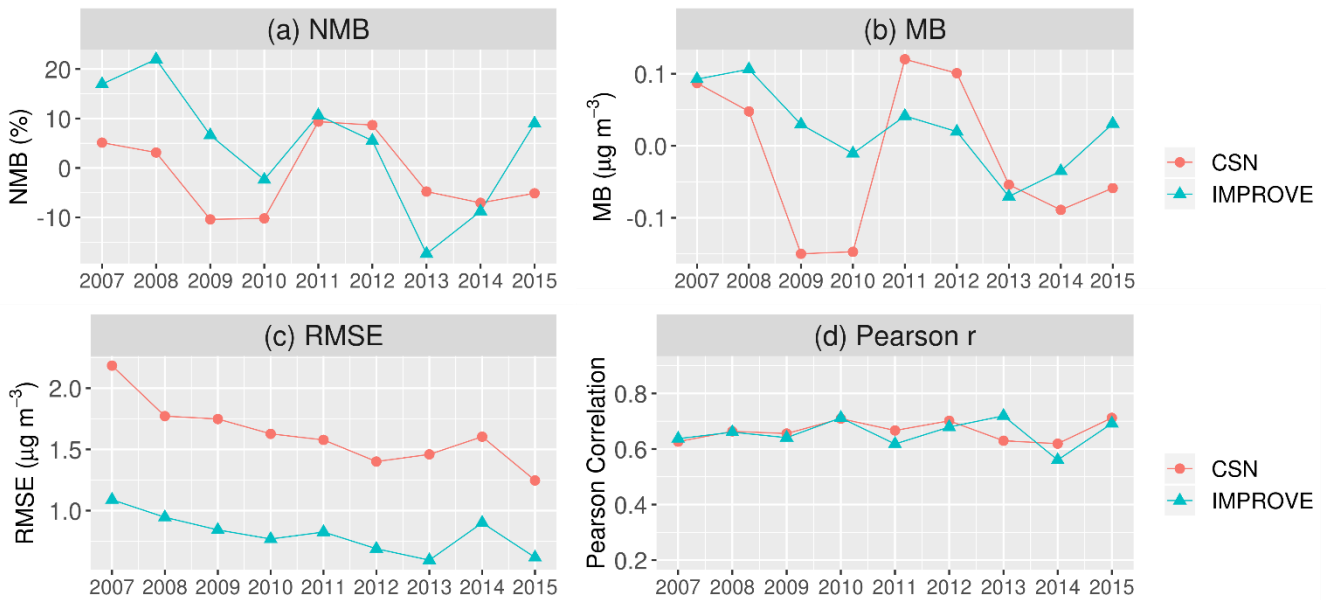

Figure S6. Annual nitrate model performance statistics by year for CSN and IMPROVE sites.



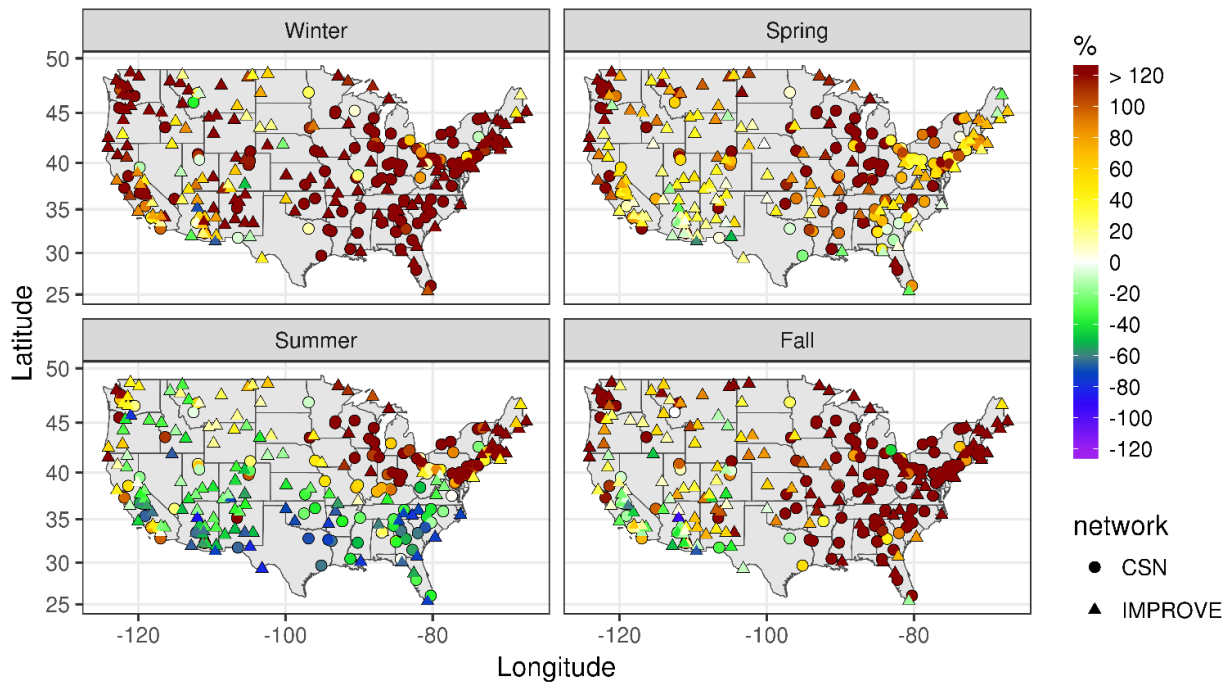

Figure S7. Normalized mean bias (NMB; %) by season for PM<sub>2.5</sub> soil predictions.

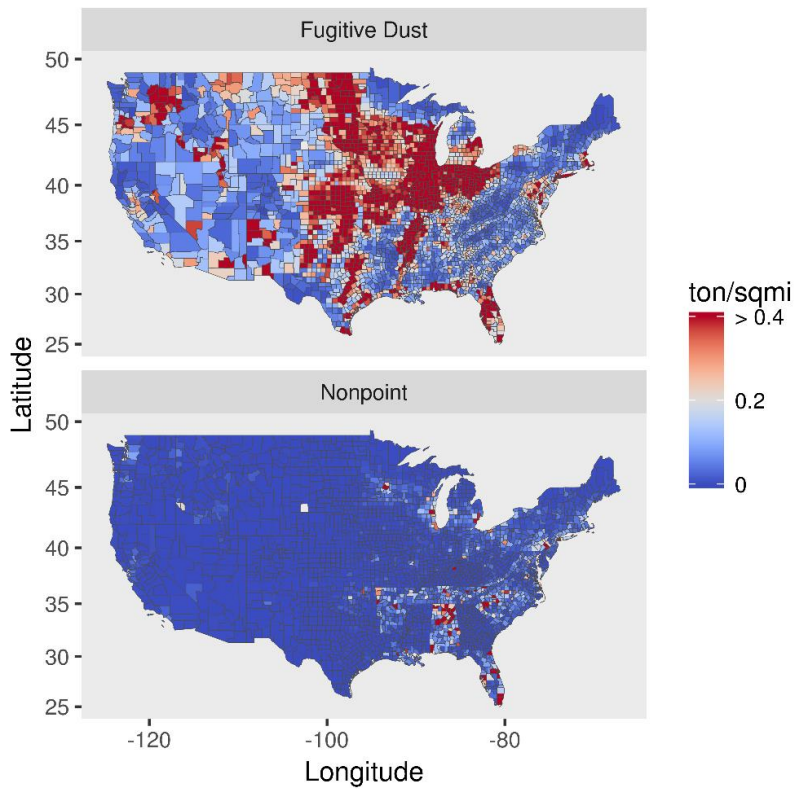

Figure S8. Annual PM<sub>2.5</sub> soil emissions from the afdust\_adj and nonpt sectors.

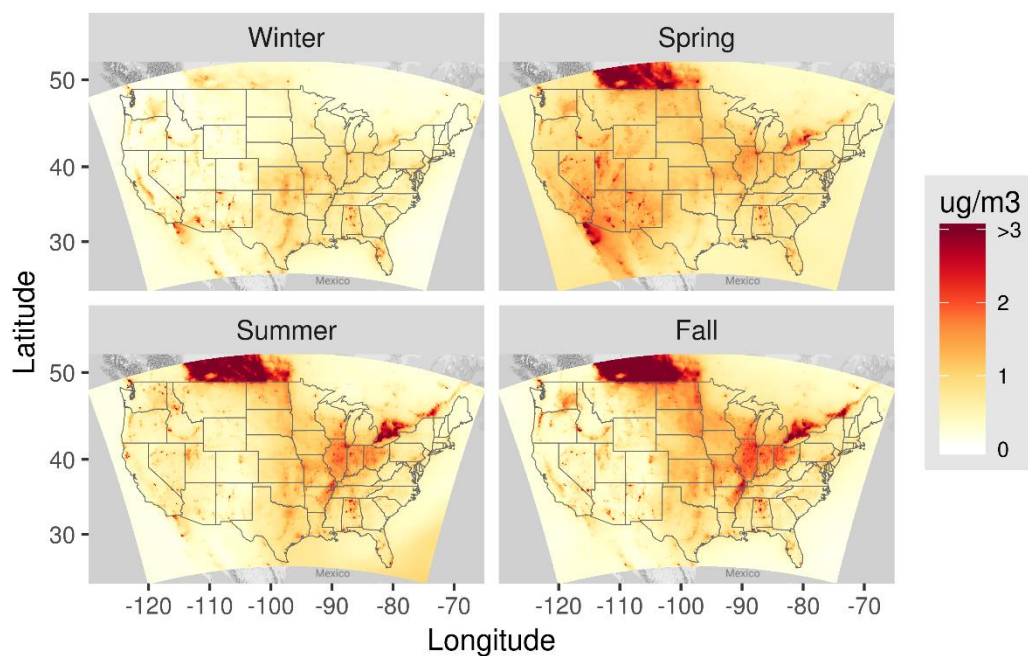

Figure S9. Seasonal average predicted PM<sub>2.5</sub> soil concentrations ( $\mu\text{g m}^{-3}$ ).

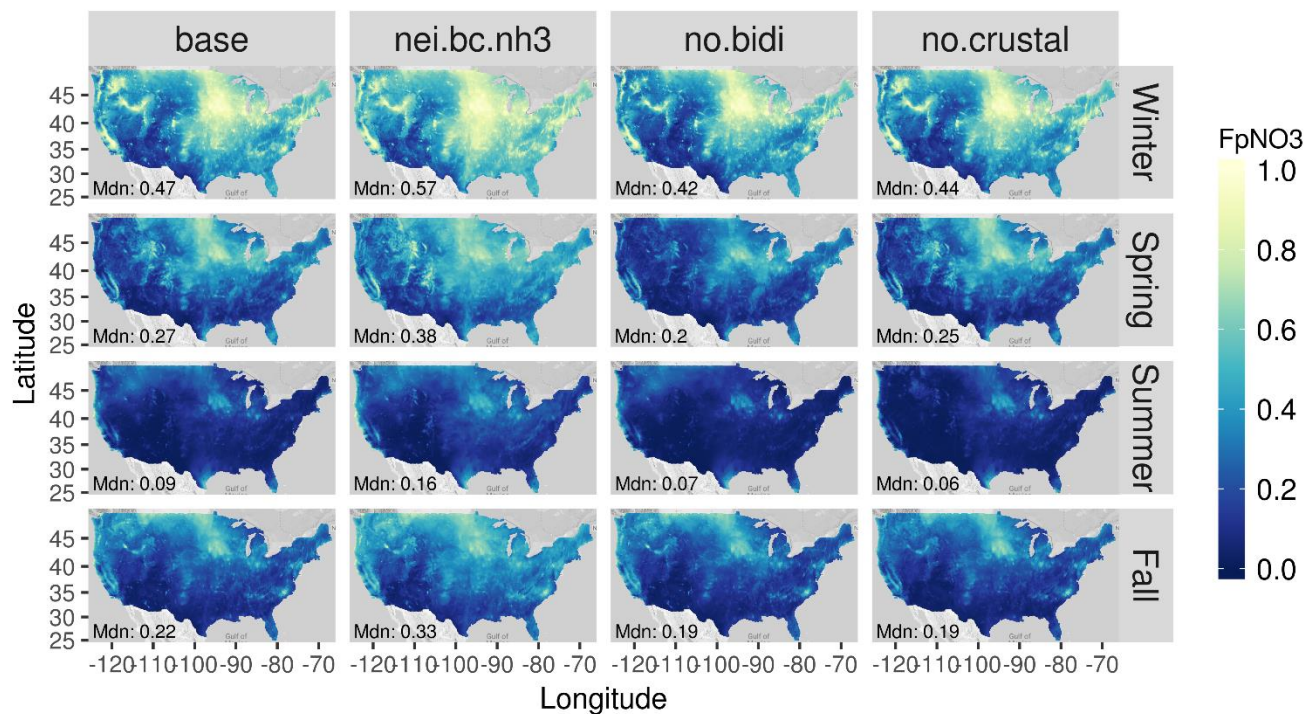

Figure S10. Fraction of total nitrate ( $\text{HNO}_3 + \text{NO}_3$ ) in the particle phase by season for the base, nei.bc.nh3, no.bidi, and no.crustal simulations. Median values across the domain are provided with text.

Table S16. Normalized mean bias (NMB; %) for model predictions of NH<sub>3</sub> at SEARCH and AMoN sites during 2015 in the base, no.bidi, and nei.bc.nh3 simulation cases.

| Network | Season | base  | no.bidi | nei.bc.nh3 |
|---------|--------|-------|---------|------------|
| SEARCH  | All    | -25.8 | -37.6   | 36.5       |
|         | Winter | -35.4 | -40.9   | -10.5      |
|         | Spring | -46.5 | -53.0   | 0.6        |
|         | Summer | 0.1   | -26.8   | 104.8      |
|         | Fall   | -19.2 | -27.9   | 51.8       |
| AMON    | All    | -54.0 | -66.4   | -12.5      |
|         | Winter | -70.7 | -76.0   | -56.4      |
|         | Spring | -60.9 | -71.6   | -29.1      |
|         | Summer | -37.3 | -59.7   | 29.5       |
|         | Fall   | -56.0 | -61.7   | -18.0      |

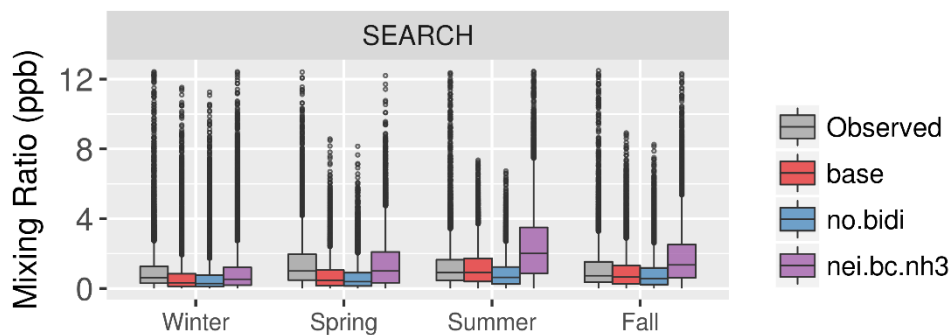

Figure S11. Observed and predicted NH<sub>3</sub> mixing ratios at SEARCH sites; values greater than 12.5 ppb not shown.

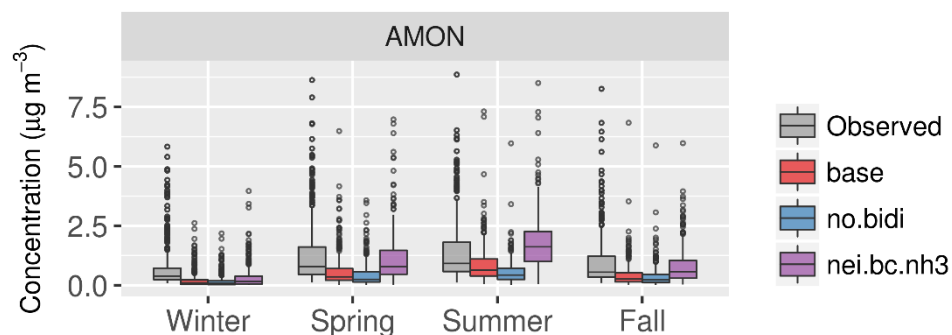

Figure S12. Observed and predicted NH<sub>3</sub> concentrations at AMoN sites; values greater than 9 µg m<sup>-3</sup> not shown.

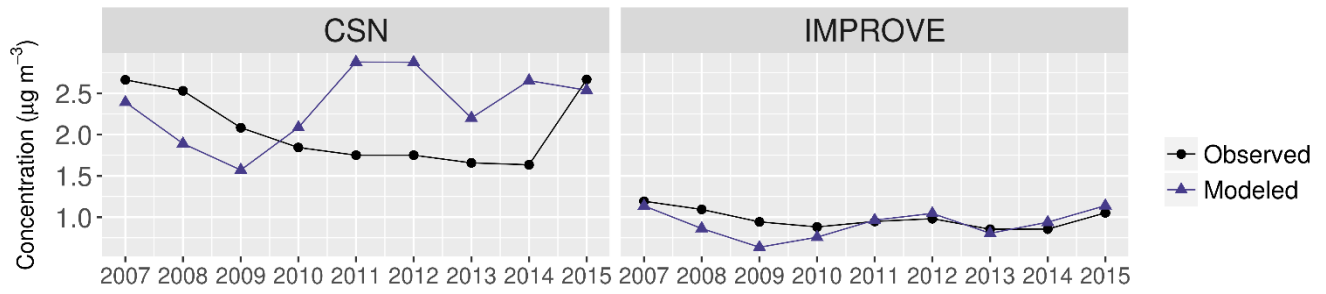

Figure S13. Annual average concentration of OC during 2007-2015.

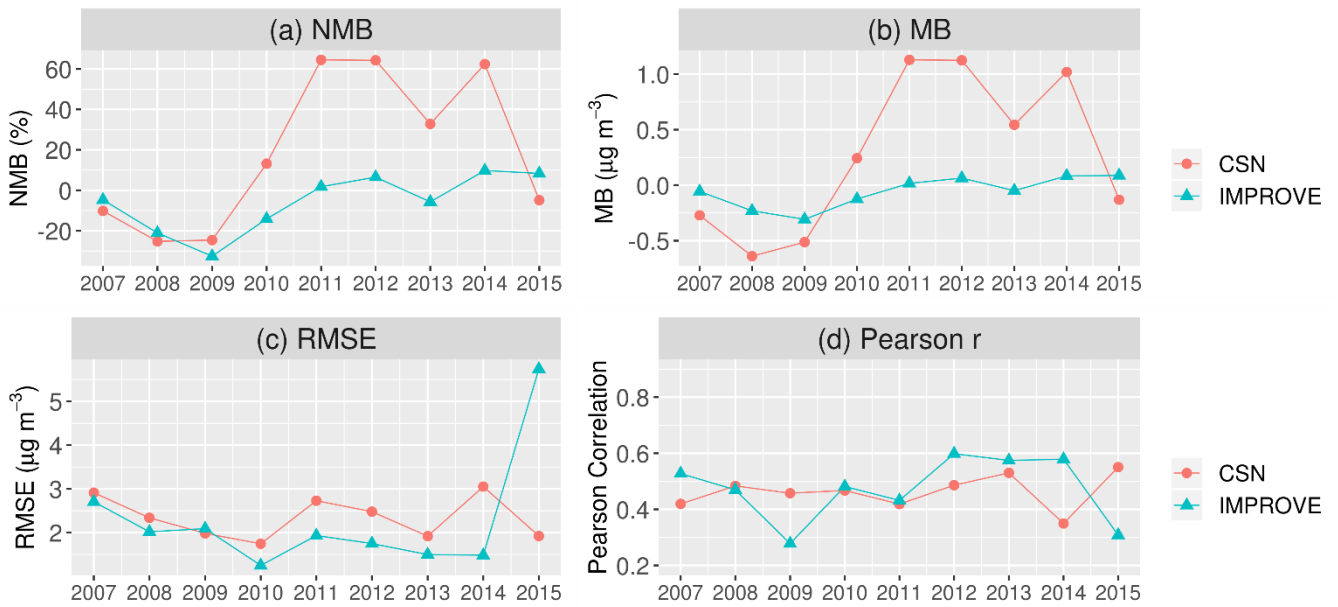

Figure S14. Annual OC model performance statistics by year.

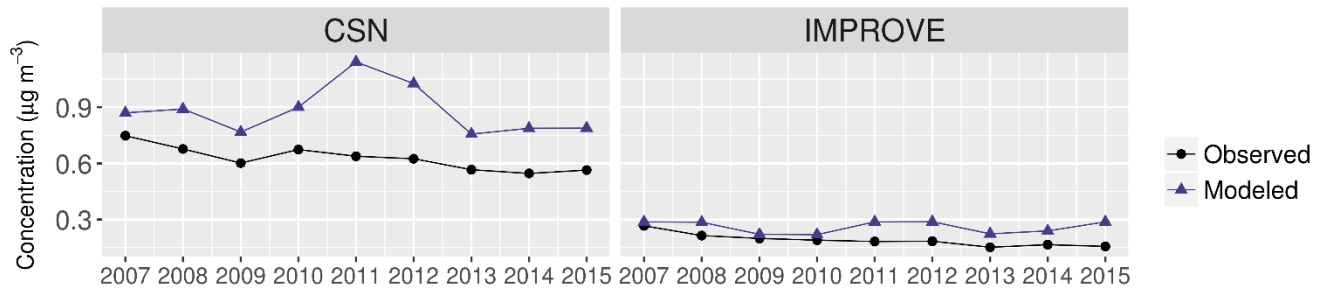

Figure S15. Annual average concentration of EC during 2007-2015.

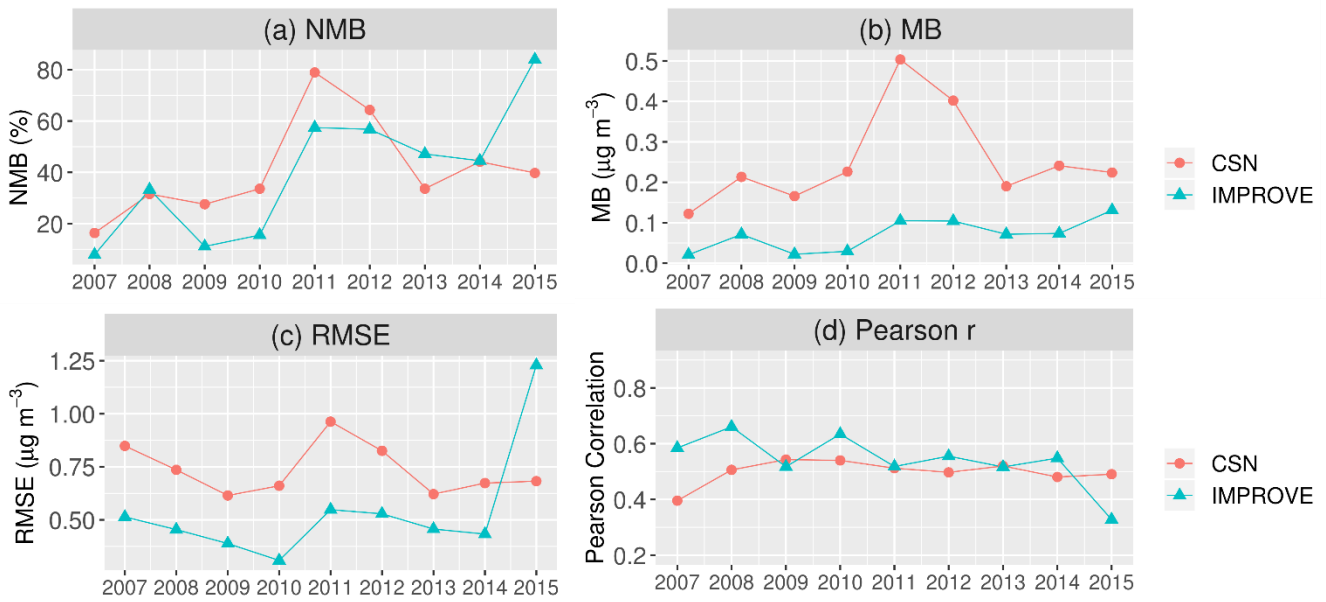

Figure S16. Annual EC model performance statistics by year.

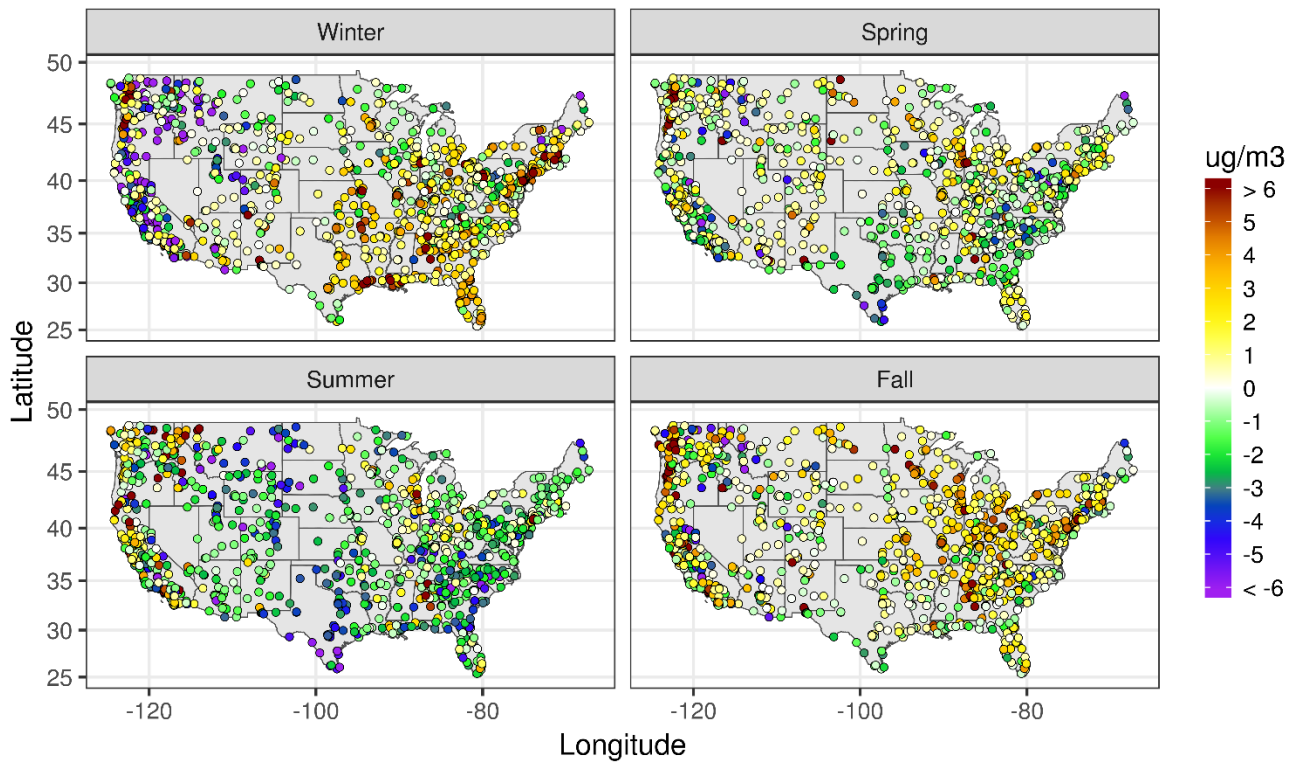

Figure S17. Mean bias (MB;  $\mu\text{g m}^{-3}$ ) by season for PM<sub>2.5</sub> predictions.

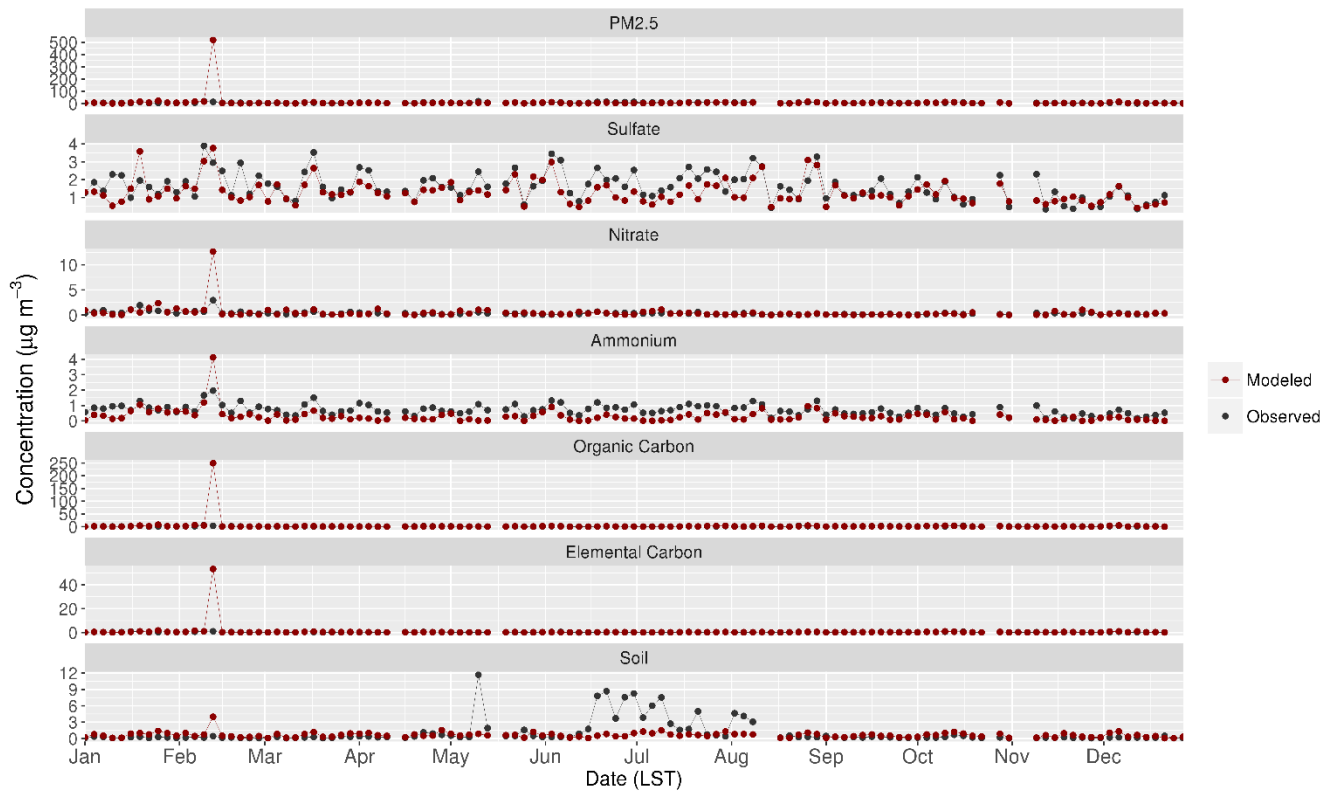

Figure S18. Modeled and observed concentrations of PM<sup>2.5</sup> and components at the Breton Island IMPROVE site in Louisiana during 2015.

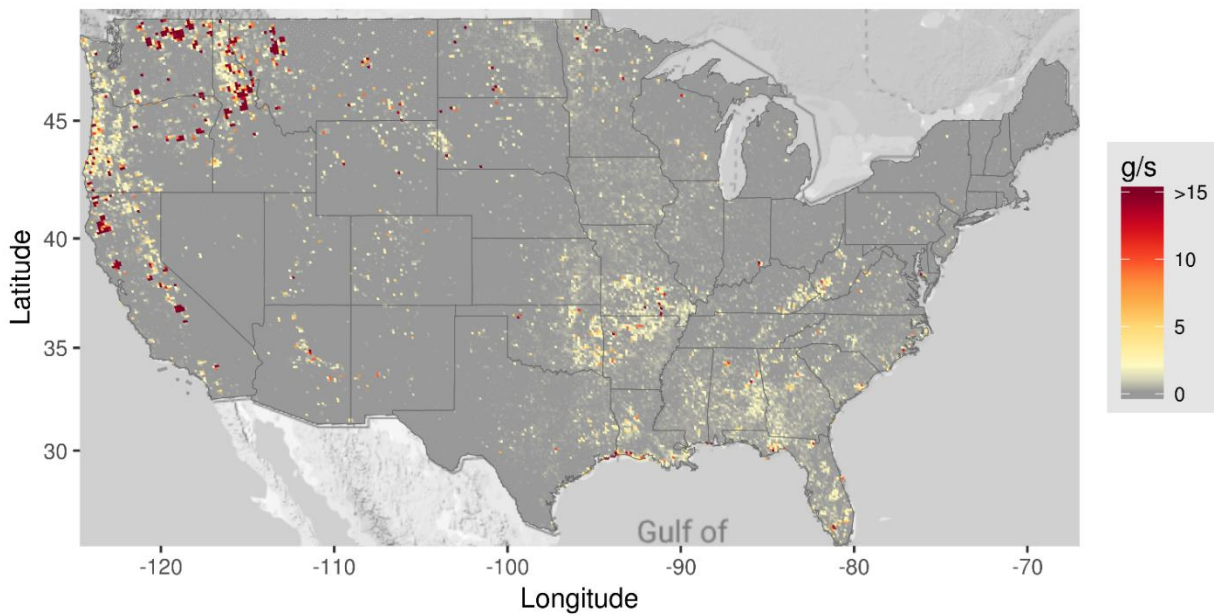

Figure S19. Annual average gridded emission rate (g/s) for primary OC from the ptfire sector.

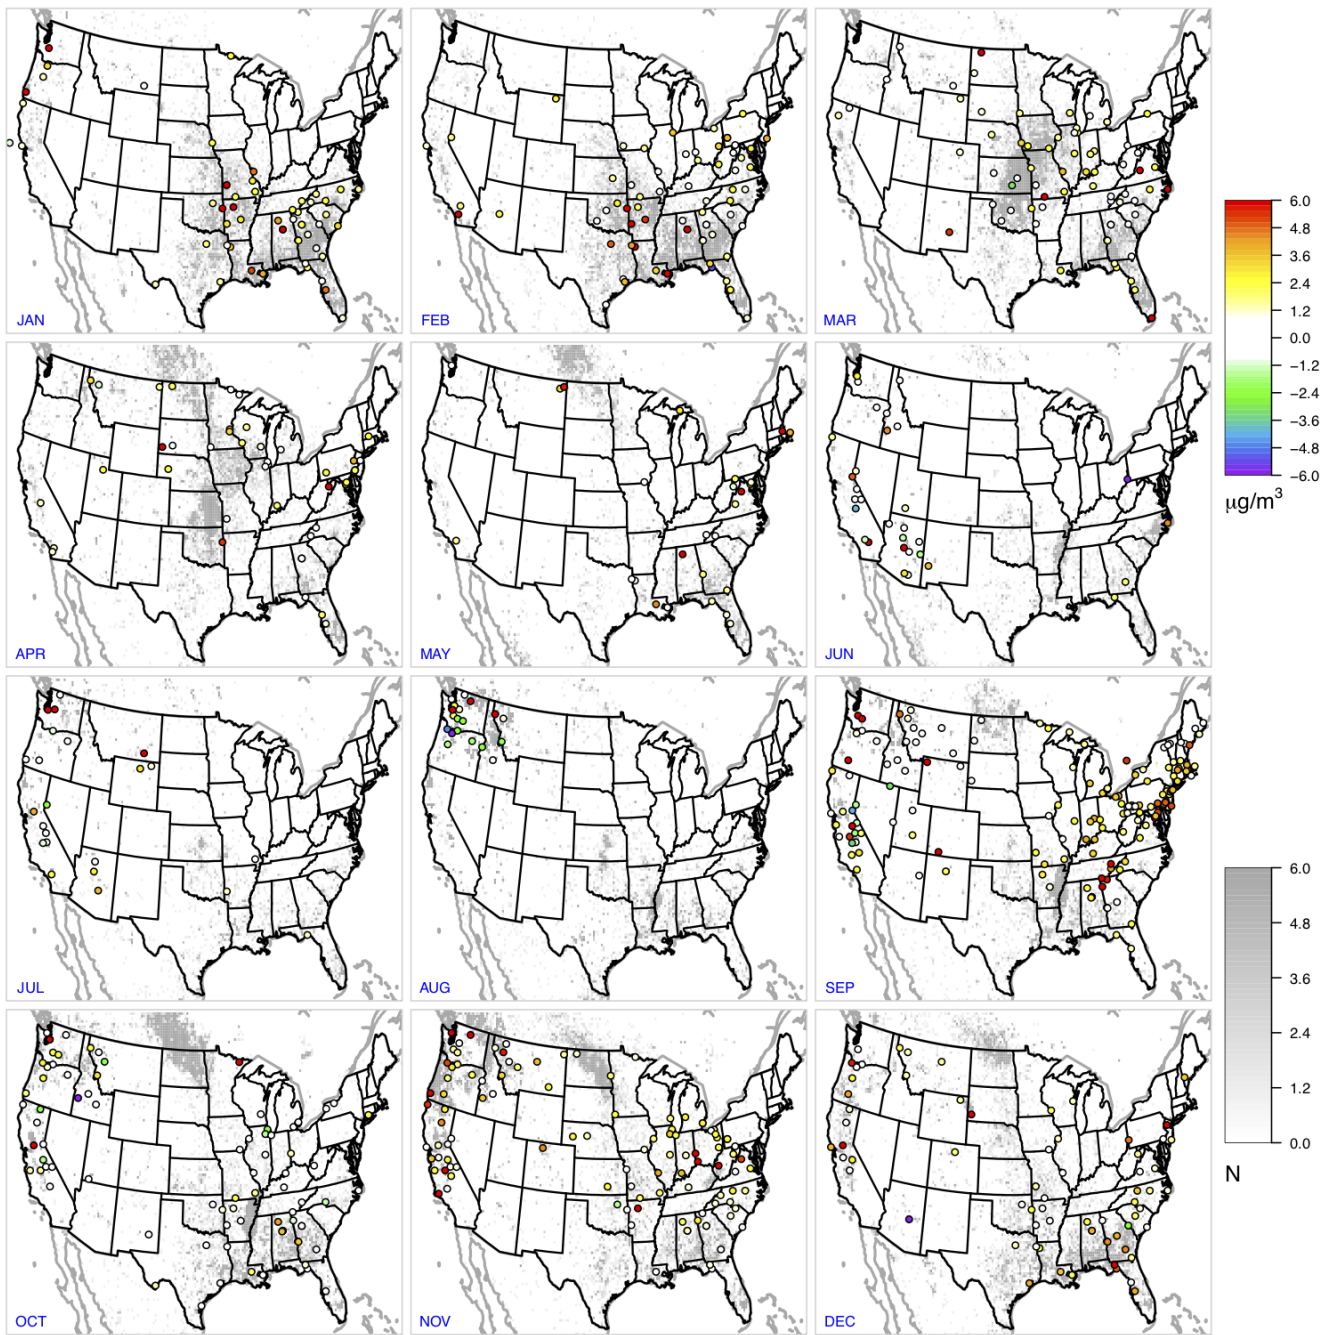

Figure S20. Bias in model predictions of PM<sub>2.5</sub> OC at IMPROVE and CSN sites on days where the modeled predicted a fire contribution to the concentration. Grey colors indicate the number of Hazard Mapping System fire detections.



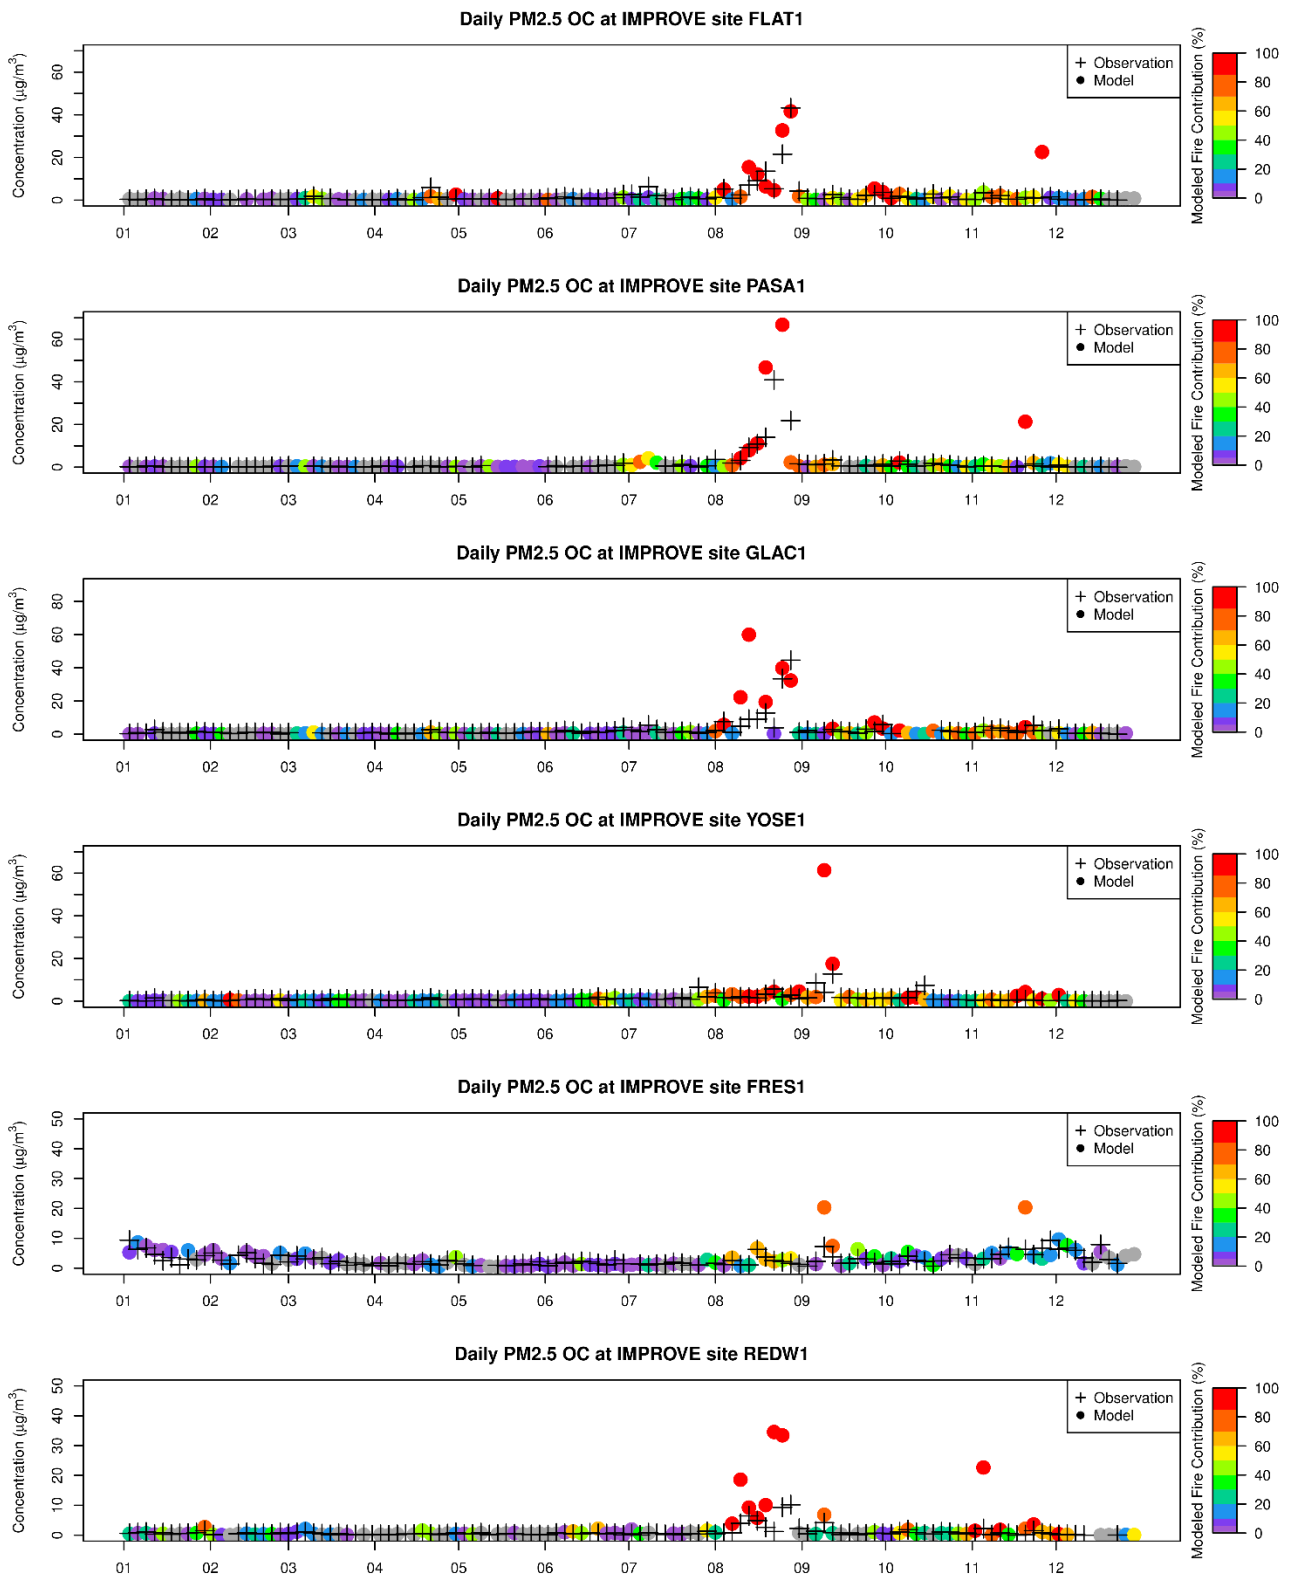

Figure S21. Comparison of PM<sub>2.5</sub> OC predictions and observations at selected IMPROVE sites colored by the modeled fire contribution. FLAT1: Flathead, MT; PASA1: Pasayten, WA; GLAC1: Glacier National Park, MT; YOSE1: Yosemite National Park, CA; FRES1: Fresno, CA; REDW1: Redwood National Park, CA

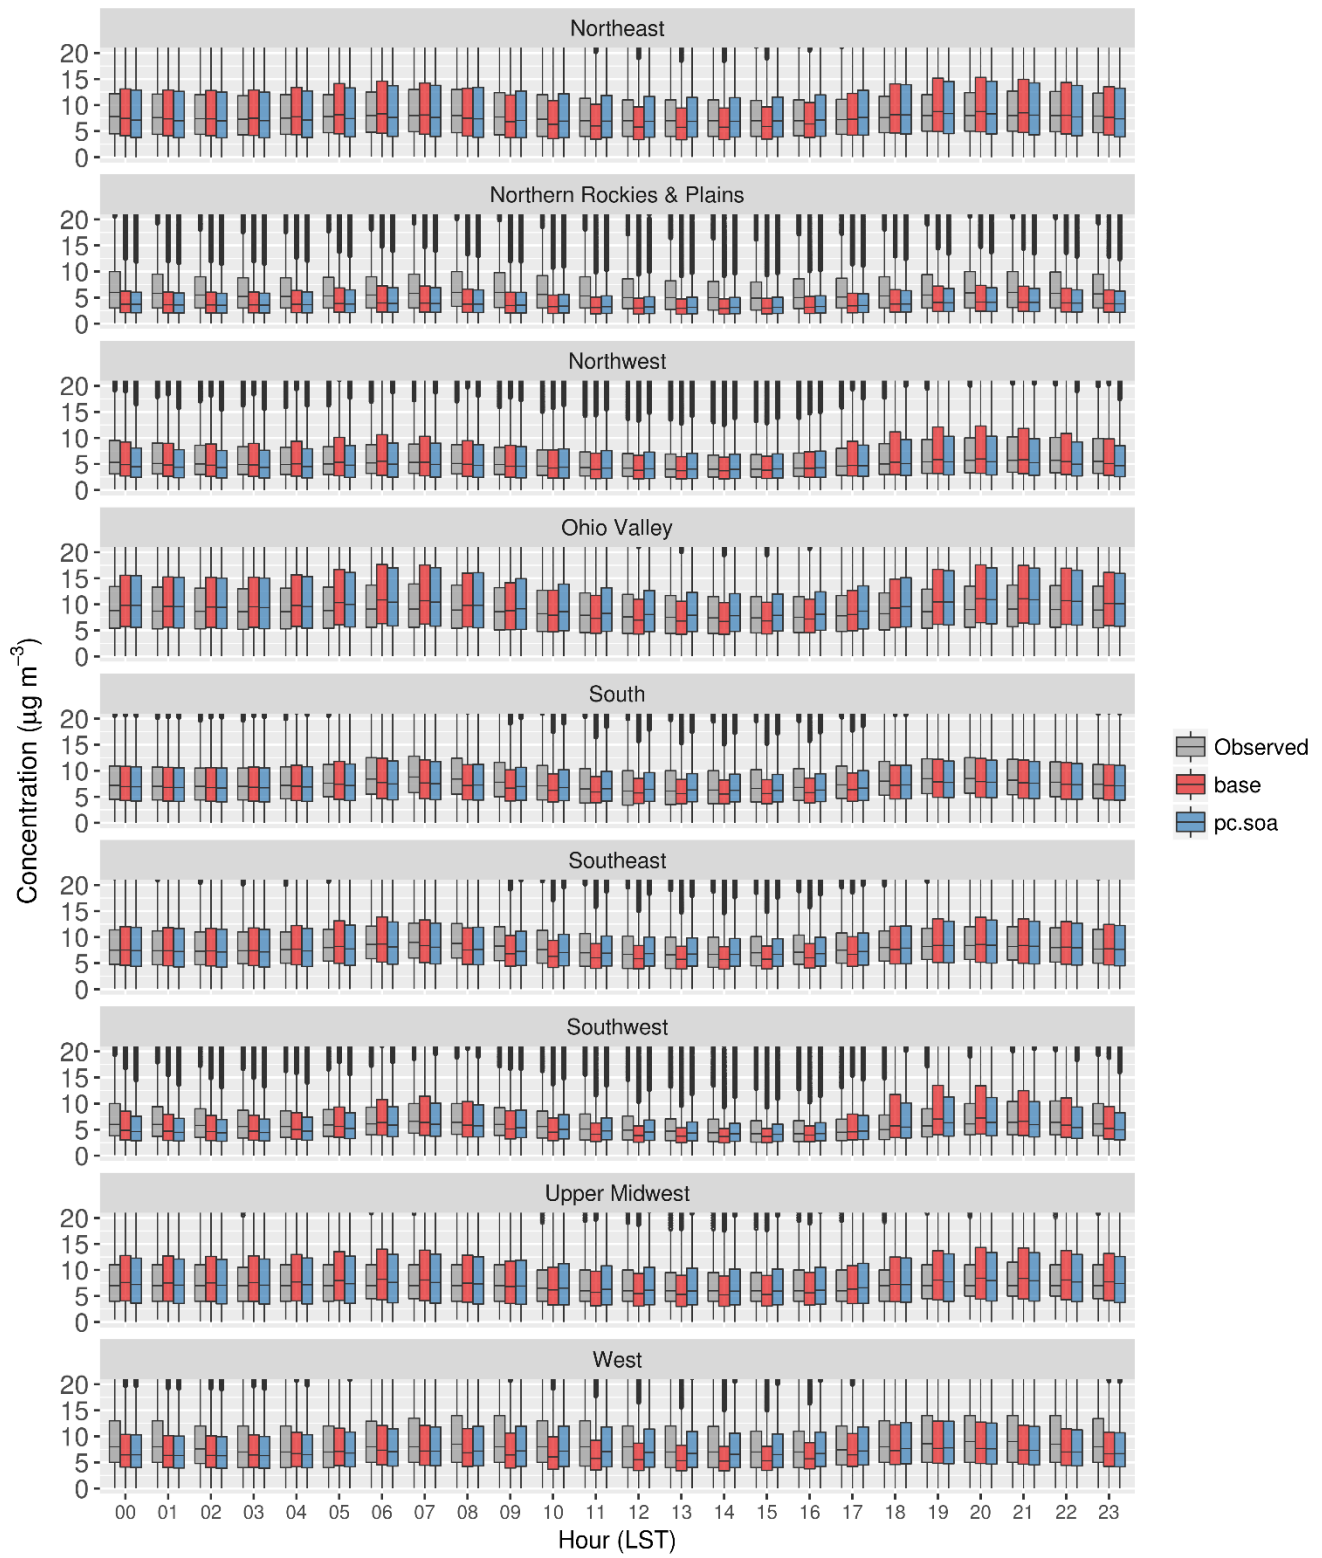

Figure S22. Comparison of hourly modeled and observed PM<sub>2.5</sub> for the 2015 base case and pc.soa simulations.

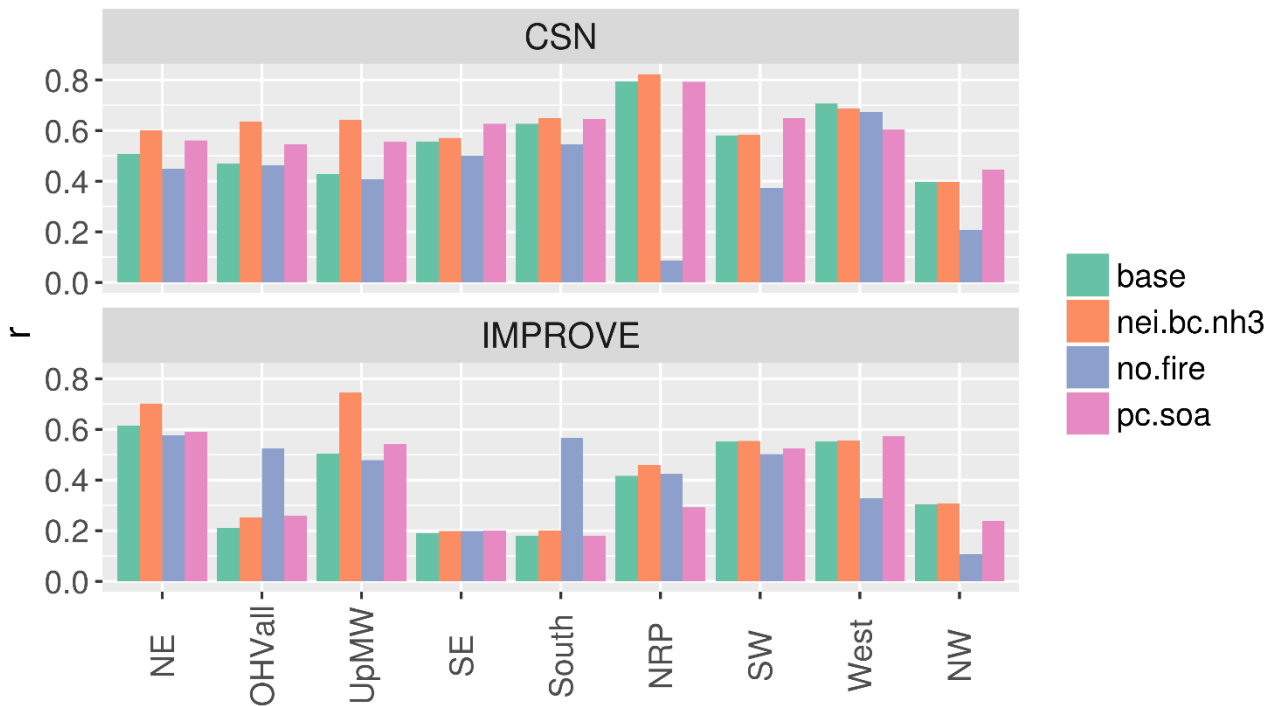

Figure S23. Comparison of annual Pearson correlation coefficient ( $r$ ) for  $PM_{2.5}$  OC in the 2015 base case with that for the wildfire, nei.bc.nh3, no.fire, and pc.soa cases at CSN and IMPROVE sites.

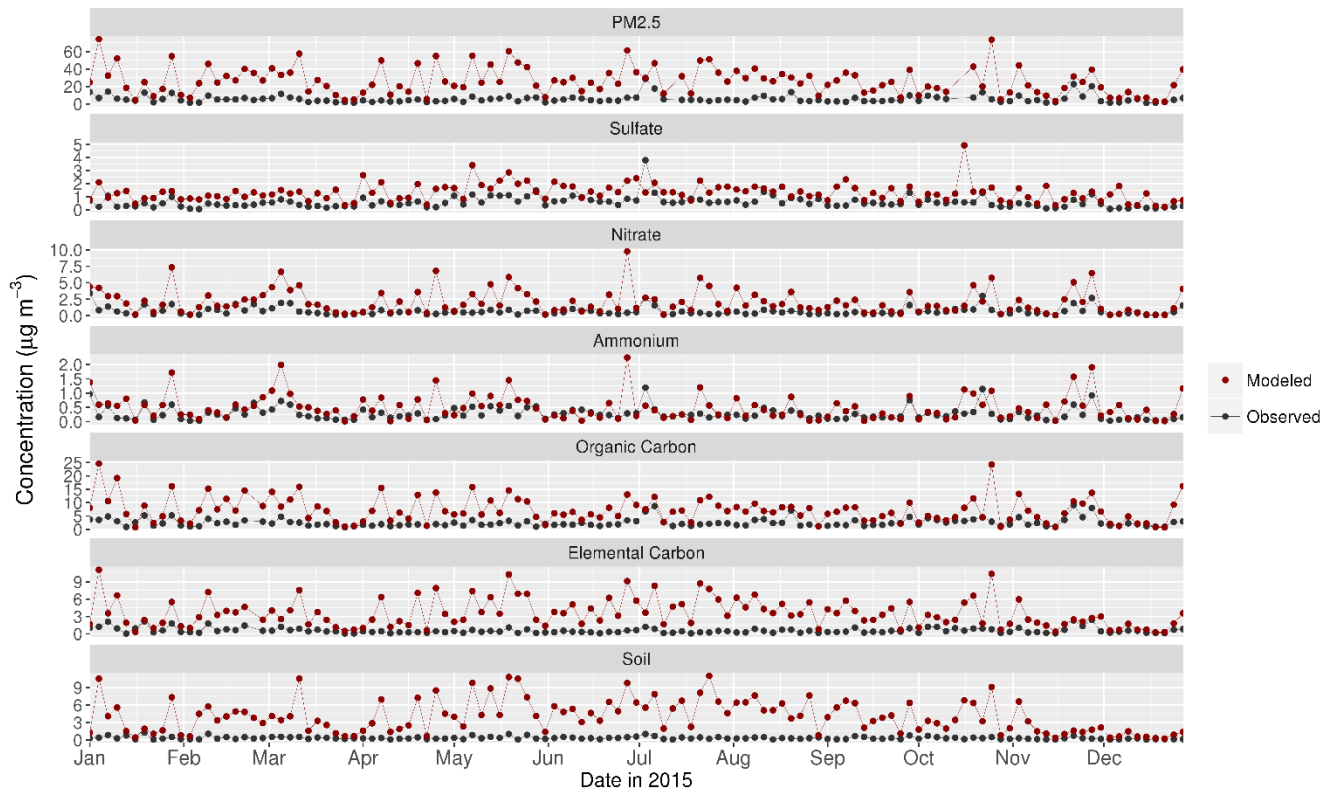

Figure S24. Comparison of 2015 base case model predictions with measurements at the Seattle-Beacon Hill CSN site (530330080). Overpredictions of EC, Soil, and OC appear to be due in part to issues in simulating the planetary boundary layer (PBL) height at this site near the Puget Sound (e.g., see Figure S25).

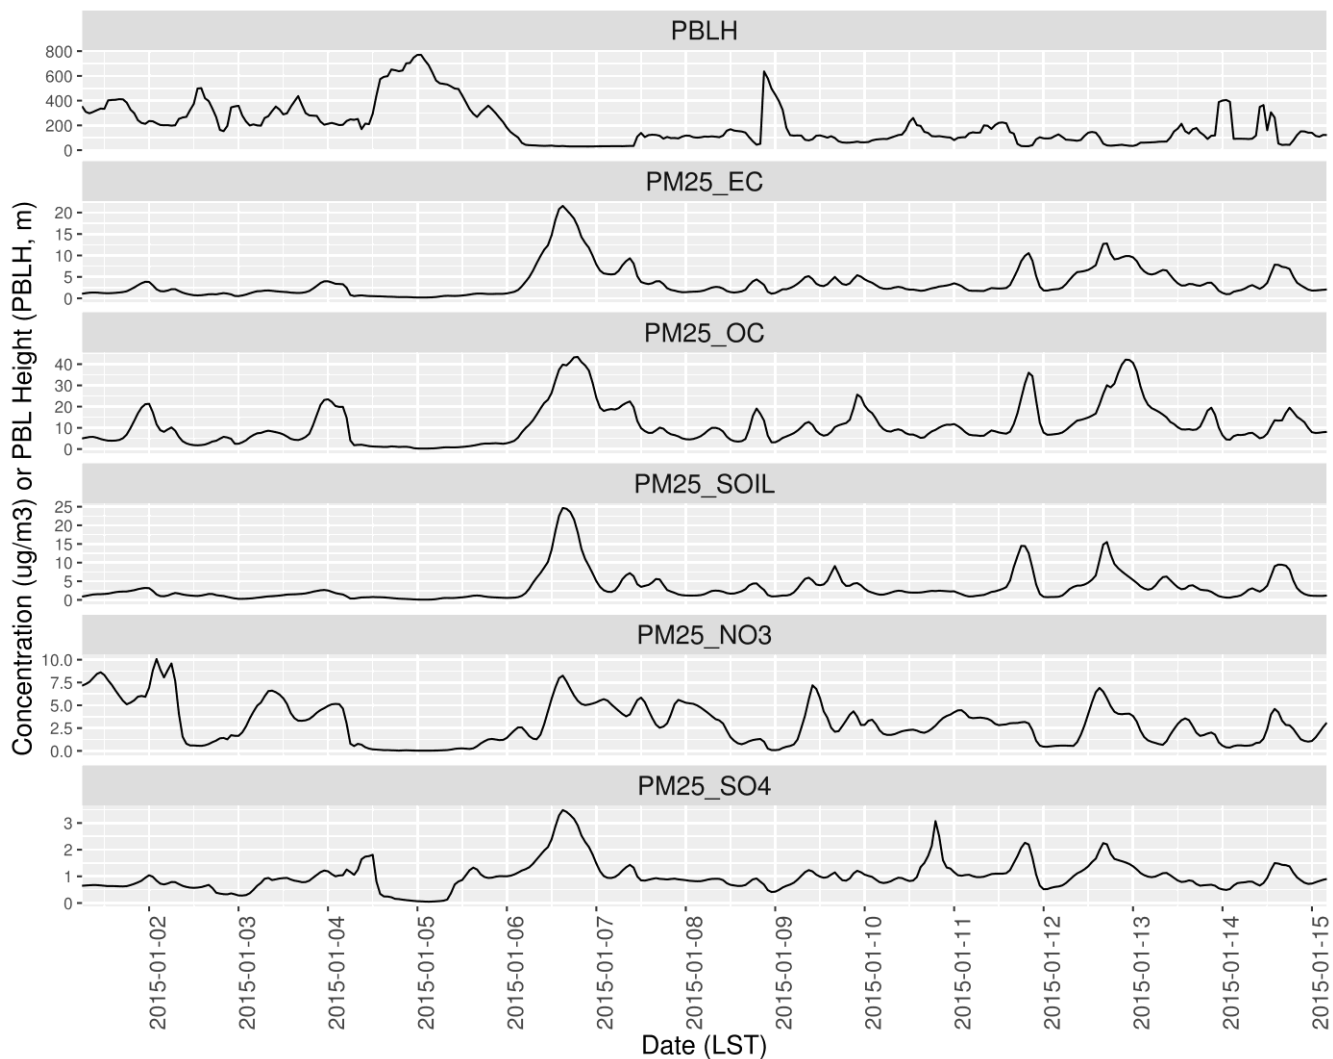

Figure S25. Comparison of 2015 base case PM<sub>2.5</sub> predictions with modeled PBL height for the grid cell containing the Seattle-Beacon Hill CSN site (530330080). Extremely high concentrations of PM<sub>2.5</sub> species (e.g., EC and Soil) are predicted on 6 January when the PBL height was generally less than 40 m. Overpredictions of PM<sub>2.5</sub> species at this site (Figure S24) appear to be due to challenges in simulating PBL height near the Puget Sound coast.

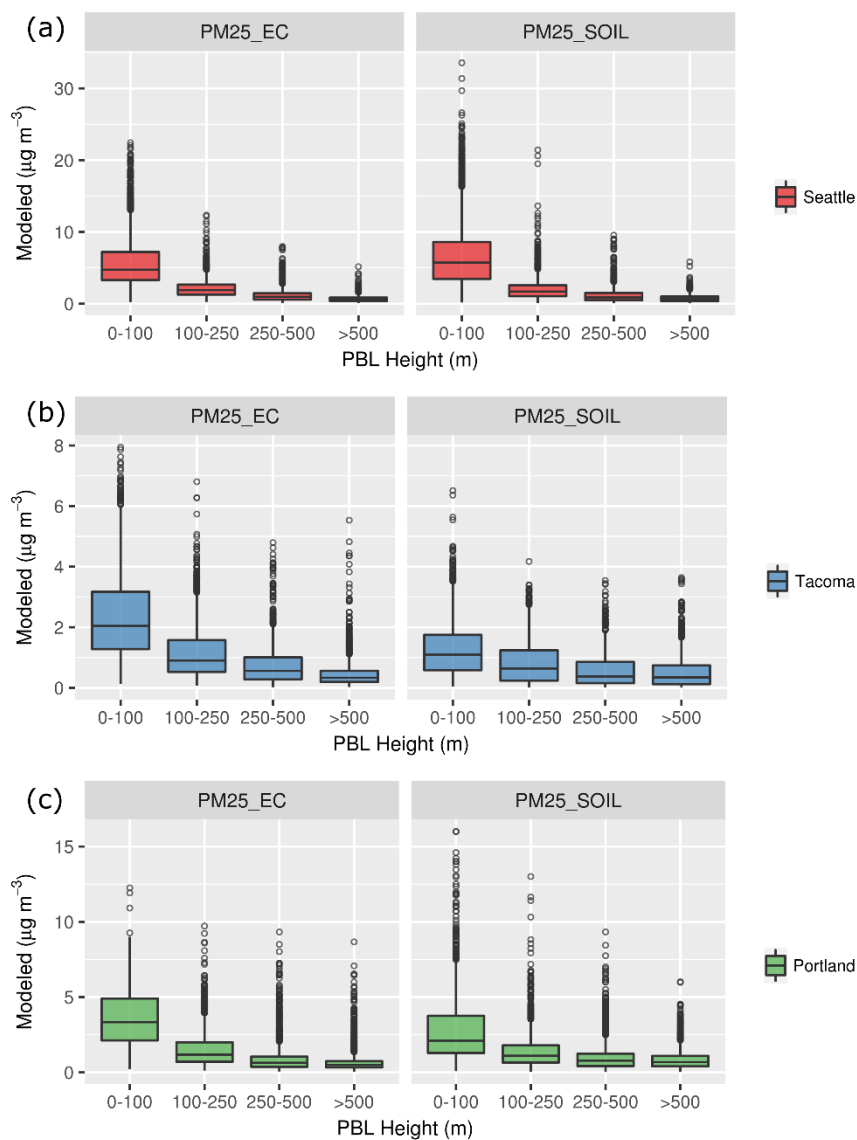

Figure S26. Relationship between simulated PBL height and EC and soil concentration at CSN sites in Seattle, Tacoma, and Portland during 2015. The strong association of concentration and PBL height suggests that overpredictions of EC and soil at these sites is related to the simulation of meteorological mixing.

Disclaimer

The views expressed in this manuscript are those of the authors alone and do not necessarily reflect the views and policies of the U.S. Environmental Protection Agency.
